# Supplementary material for: Domino alkyne insertion/aldol reaction/aromatization of 2-alkynyl indole-3-carbaldehyde with 1,3-diketones: entry to 2-indolyl phenols
Source: Royal Society of Chemistry journal article supplement (doi:10.1039/d2ob02025d), 2023-01-01

## Supporting Information

### Domino alkyne insertion/aldol reaction/aromatization of 2-alkynyl indole-3-carbaldehyde with 1,3-diketones: Entry to 2-indolyl phenols

Chada Raji Reddy,<sup>\*a,b</sup> Karna Nair,<sup>a,b</sup> Amol D. Patil,<sup>a,b</sup> Ramachandra Reddy Donthiri,<sup>a</sup> René Grée<sup>c</sup>

<sup>a</sup>Department of Organic Synthesis & Process Chemistry

CSIR-Indian Institute of Chemical Technology (CSIR-IICT), Hyderabad 500007, India

<sup>b</sup>Academy of Scientific and Innovative Research (AcSIR) Ghaziabad 201 002, India.

<sup>c</sup>University of Rennes, Institut des Sciences Chimiques de Rennes (ISCR), CNRS UMR 6226, F-35000  
Rennes, France

E-mail: rajireddy@iict.res.in

### Table of contents

|                                                                             |       |         |
|-----------------------------------------------------------------------------|-------|---------|
| 1. X-Ray Crystallography method (for <b>3a</b> )                            | ..... | S2      |
| 2. <sup>1</sup> H and <sup>13</sup> C NMR spectra new starting materials    | ..... | S3-S21  |
| 3. <sup>1</sup> H and <sup>13</sup> C NMR spectra of phenols and carbazoles | ..... | S22-S62 |

## 1. X-ray Crystallography of 3a.

Data for the compound **3a** was collected at room temperature on a Bruker D8 QUEST instrument with an I $\mu$ S Mo microsource ( $\lambda = 0.7107$  Å) and a PHOTON-100 detector. The raw data frames were reduced and corrected for absorption effects using the Bruker Apex 3 software suite programs [1]. The structure was solved using intrinsic phasing method [2] and further refined with the SHELXL [2] program and expanded using Fourier techniques. Anisotropic displacement parameters were included for all non-hydrogen atoms. The O-bound H atom was located in difference Fourier maps and their positions and isotropic displacement parameters were located and refined. All C bound H atoms were positioned geometrically and treated as riding on their parent C atoms [C-H = 0.93-0.97 Å and  $U_{\text{iso}}(\text{H}) = 1.5U_{\text{eq}}(\text{C})$  for methyl H or  $1.2U_{\text{eq}}(\text{C})$  for other H atoms].

### Crystal structure determination of 3a

**Crystal Data** for  $\text{C}_{23}\text{H}_{19}\text{NO}_2$  ( $M = 341.413$  g/mol): monoclinic, space group  $\text{P}2_1/\text{n}$  (no. 14),  $a = 10.5837(11)$  Å,  $b = 14.4099(13)$  Å,  $c = 12.4674(13)$  Å,  $\beta = 90.773(4)^\circ$ ,  $V = 1901.2(3)$  Å<sup>3</sup>,  $Z = 4$ ,  $T = 294.15$  K,  $\mu(\text{Mo K}\alpha) = 0.076$  mm<sup>-1</sup>,  $D_{\text{calc}} = 1.193$  g/cm<sup>3</sup>, 35526 reflections measured ( $4.32^\circ \leq 2\theta \leq 60.86^\circ$ ), 5015 unique ( $R_{\text{int}} = 0.0692$ ,  $R_{\text{sigma}} = 0.0425$ ) which were used in all calculations. The final  $R_1$  was 0.0667 ( $I >= 2u(I)$ ) and  $wR_2$  was 0.1689 (all data). CCDC 2217042 contains supplementary Crystallographic data for the structure. These data can be obtained free of charge at [www.ccdc.cam.ac.uk/conts/retrieving.html](http://www.ccdc.cam.ac.uk/conts/retrieving.html) [or from the Cambridge Crystallographic Data Centre (CCDC), 12 Union Road, Cambridge CB2 1EZ, UK; fax: +44(0) 1223 336 033; email: [deposit@ccdc.cam.ac.uk](mailto:deposit@ccdc.cam.ac.uk)].

1. Bruker (2001). SAINT (Version 6.28a) & SMART (Version 5.625). Bruker AXS Inc., Madison, Wisconsin, USA.
2. Sheldrick G. M. (2015) Acta Crystallogr C71: 3-8.

## 2. $^1\text{H}$ and $^{13}\text{C}$ NMR spectra new starting Materials

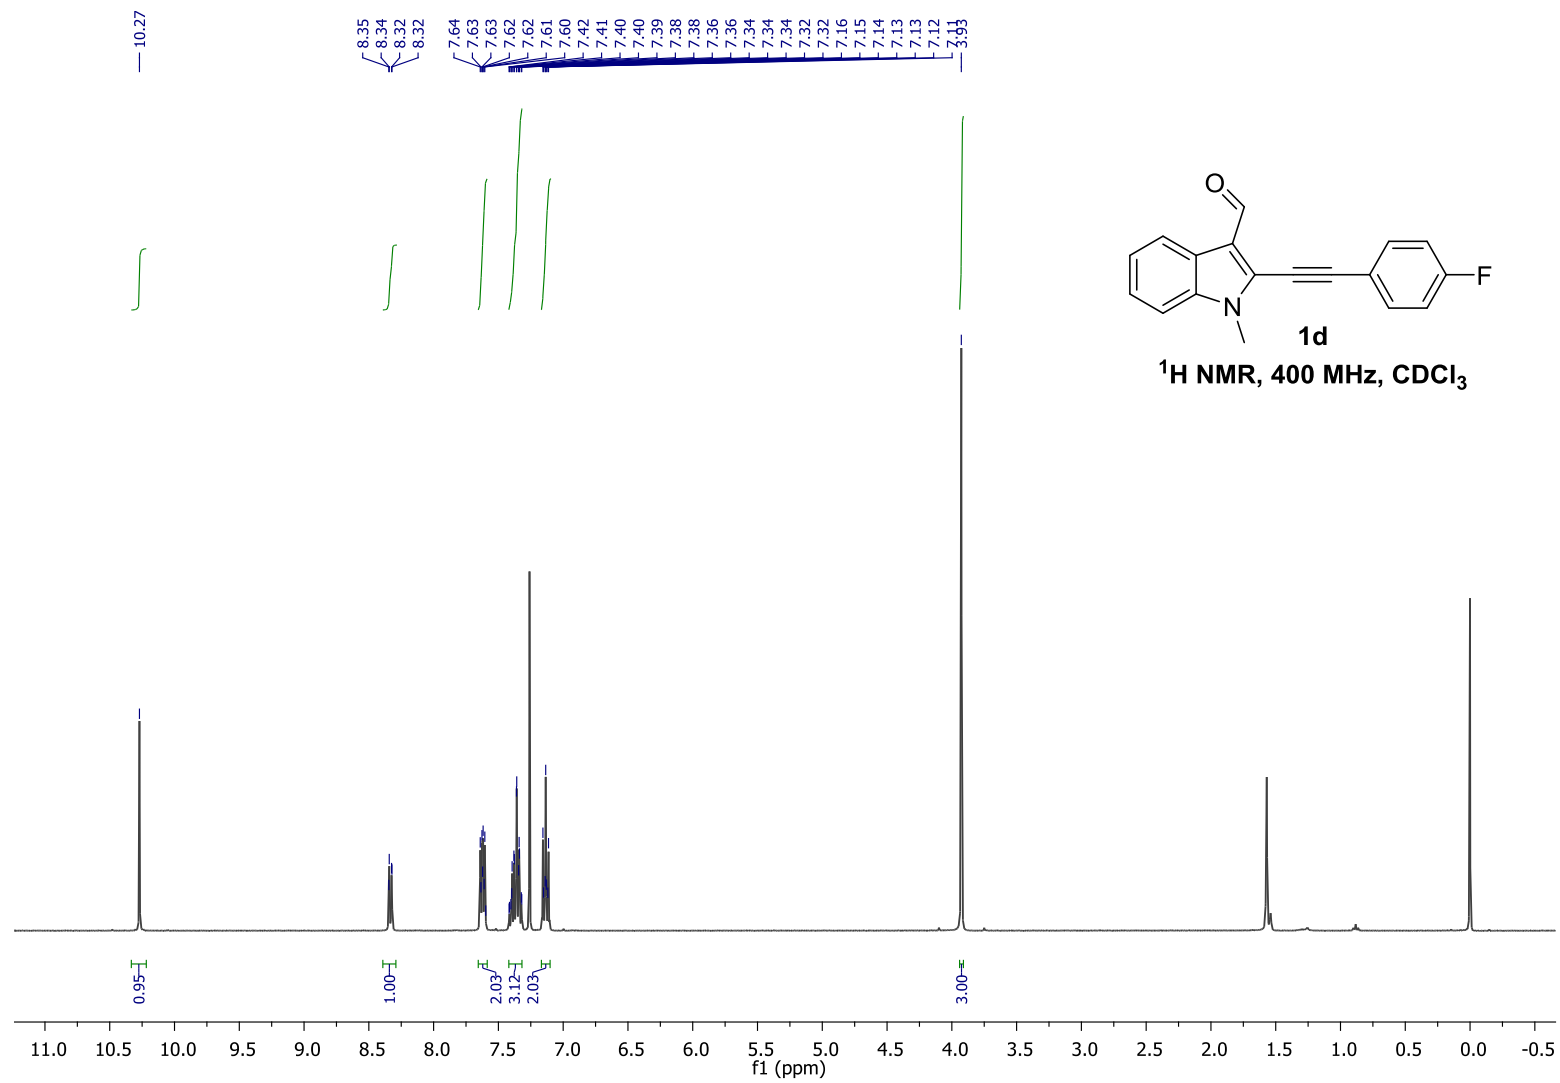

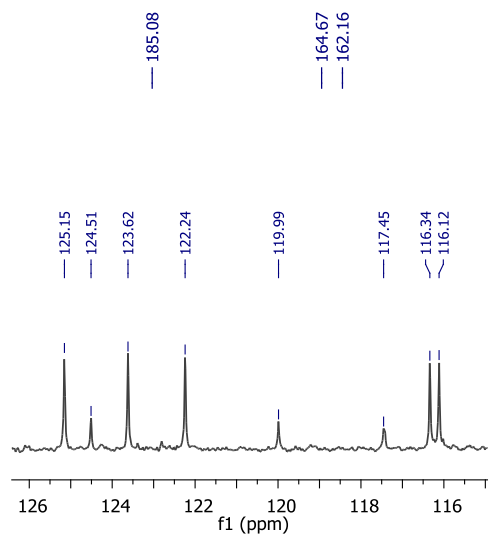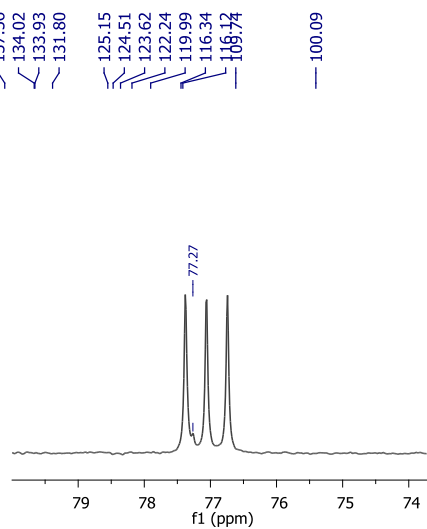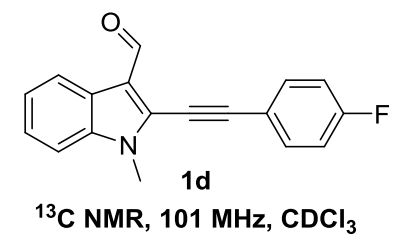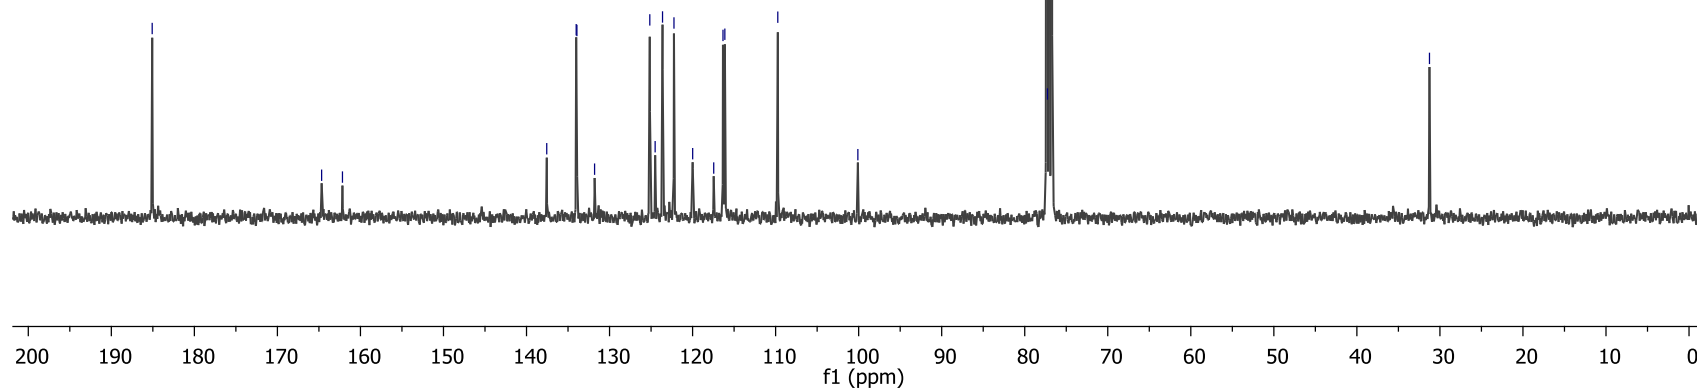

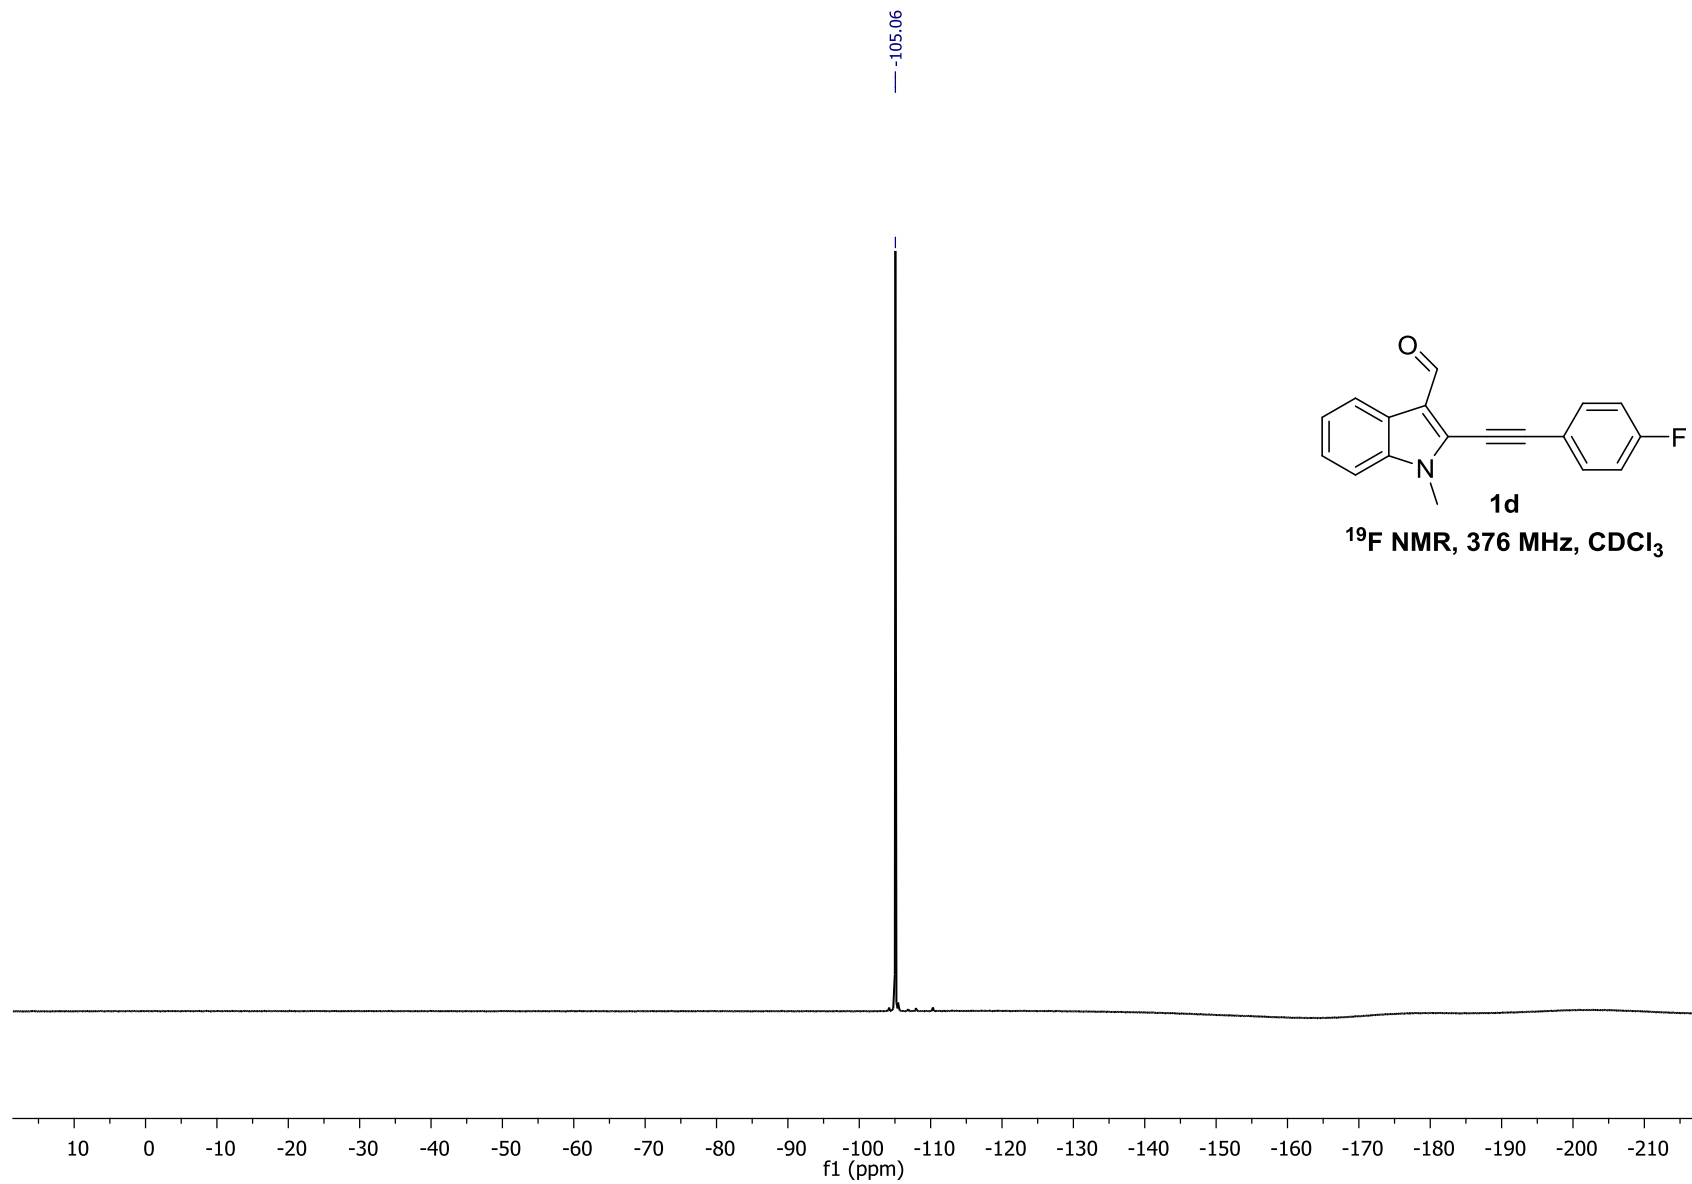

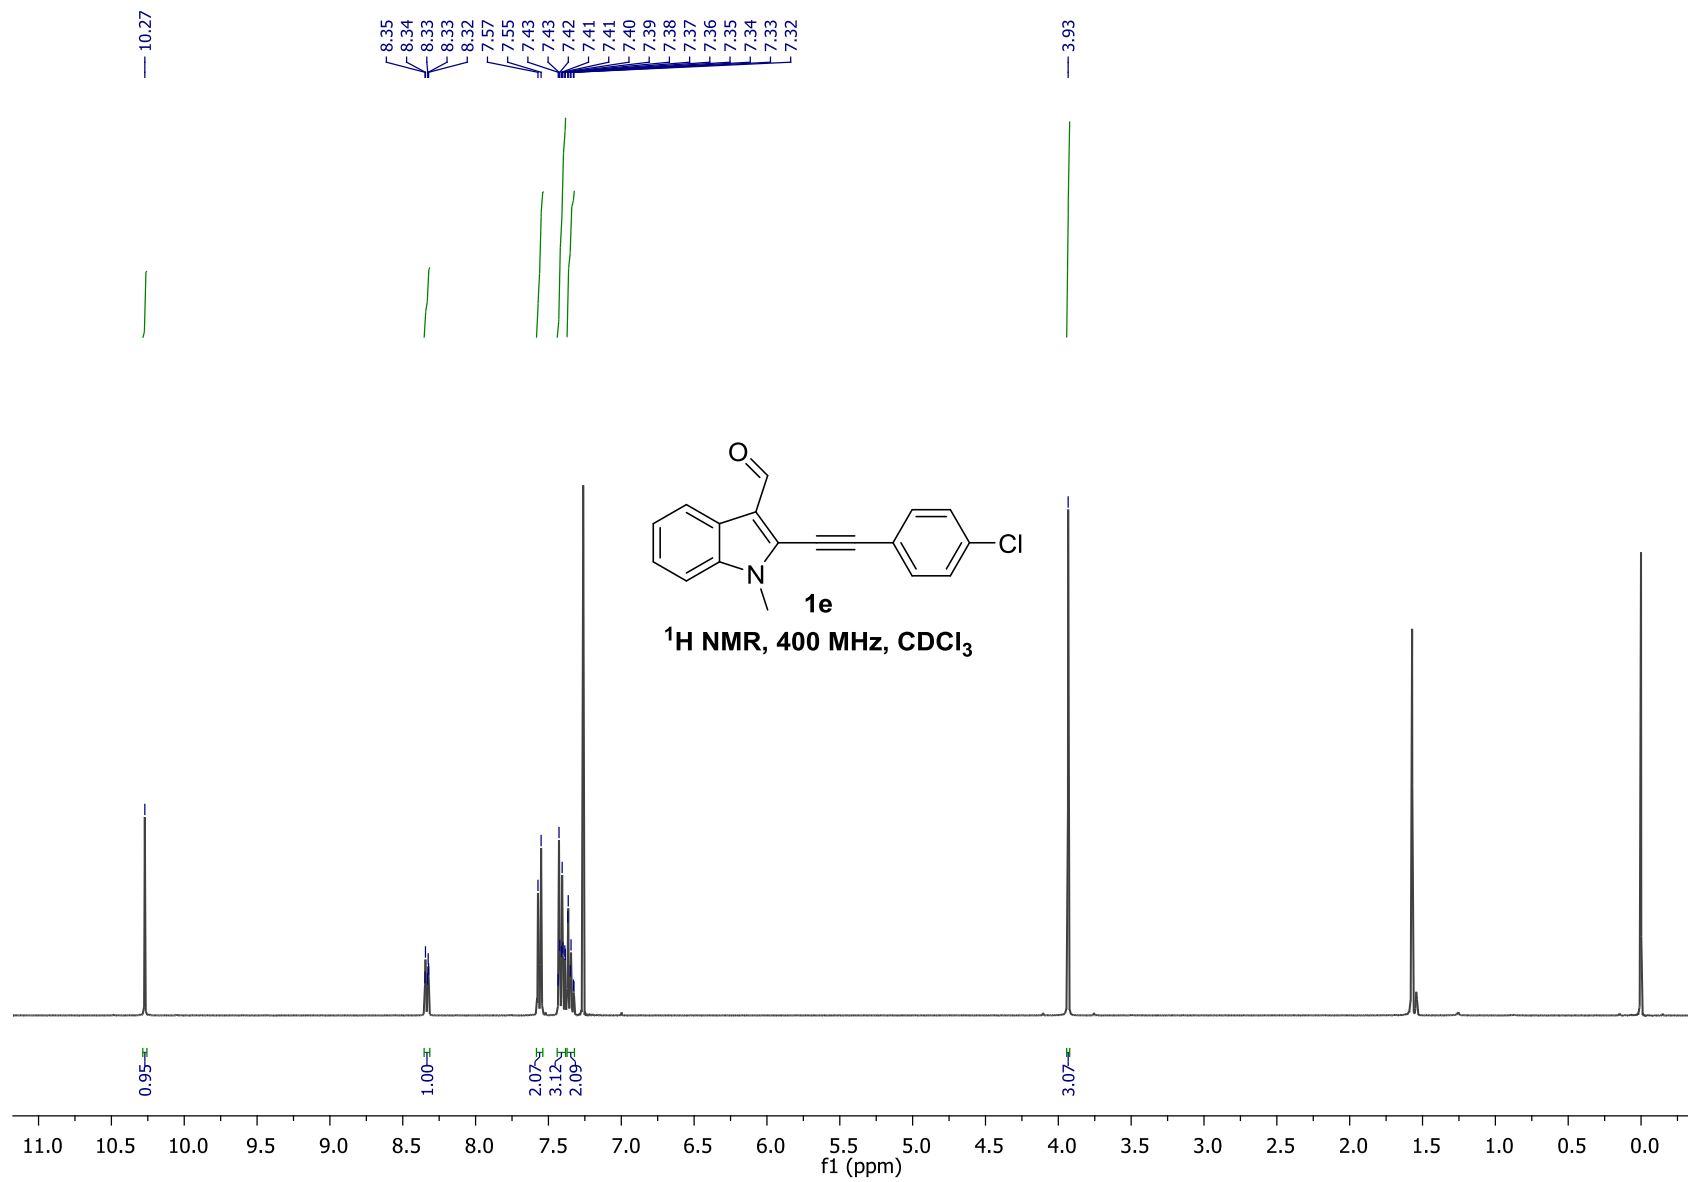

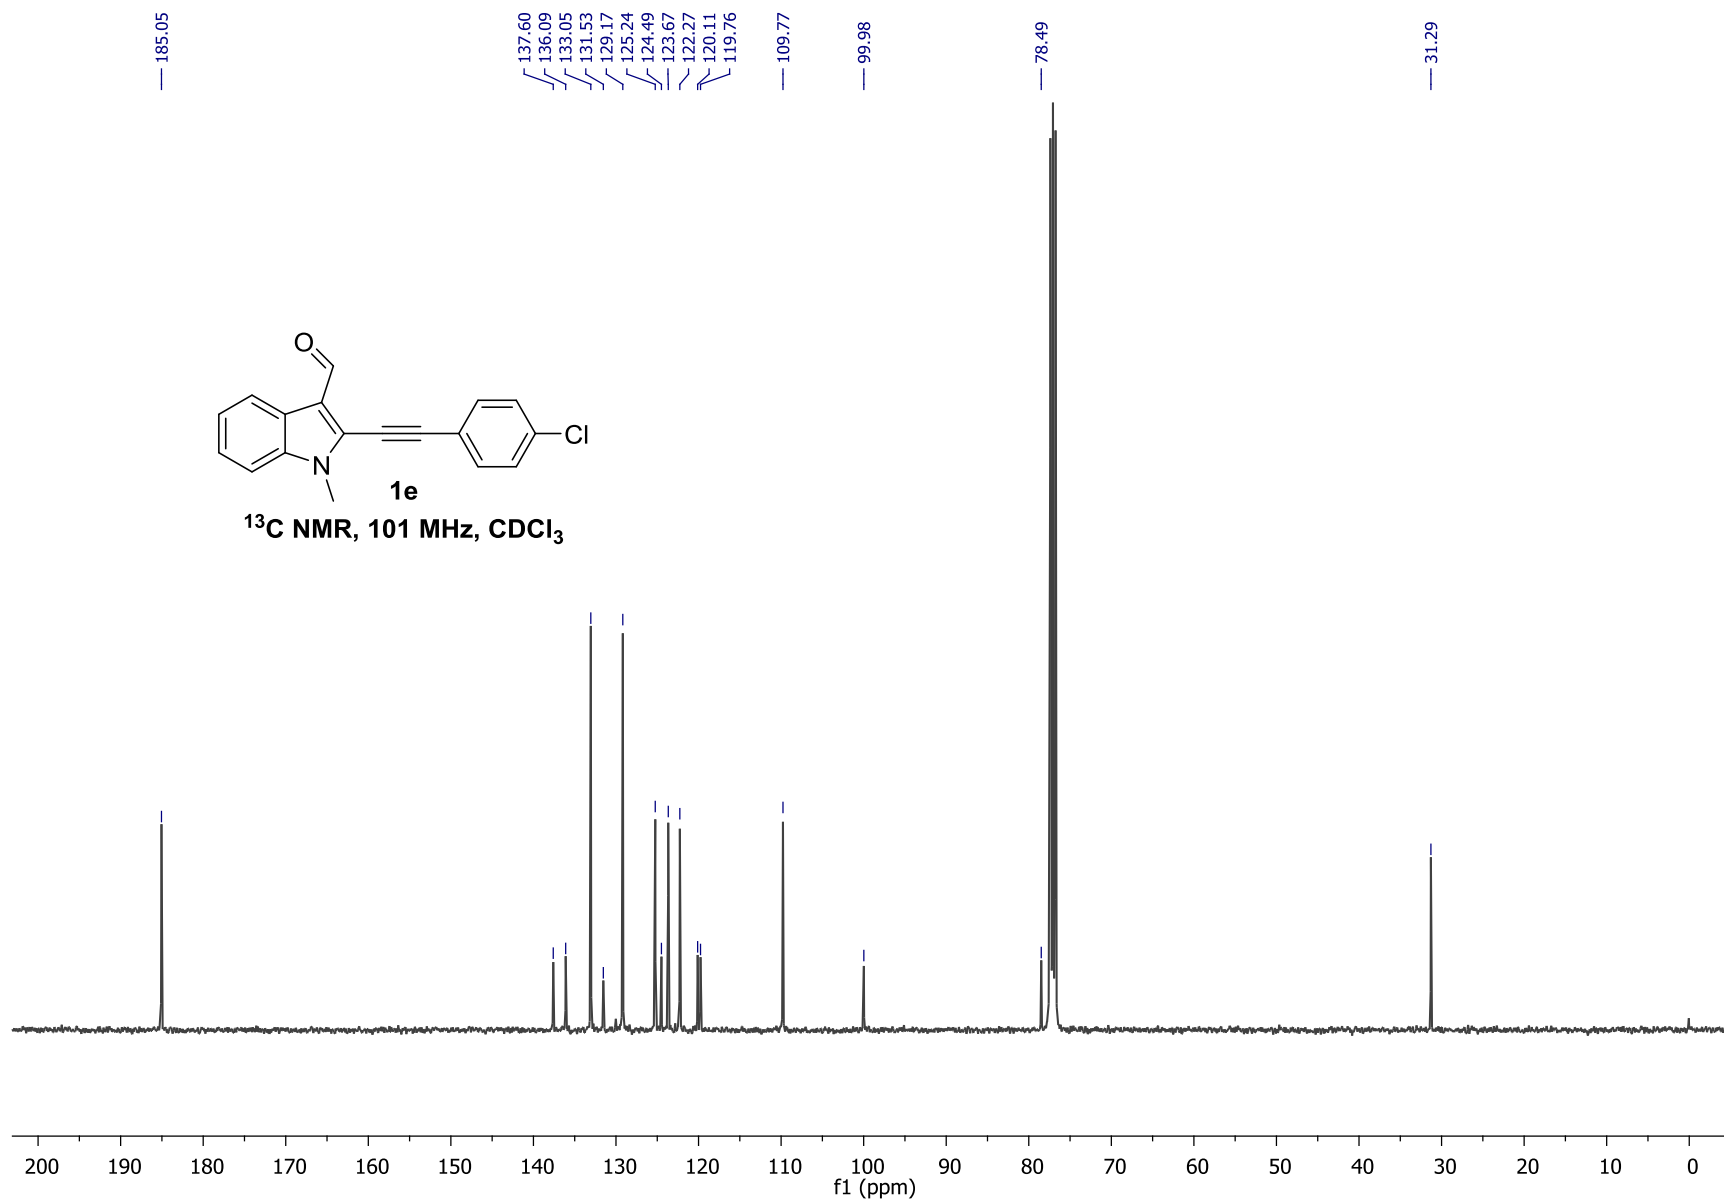

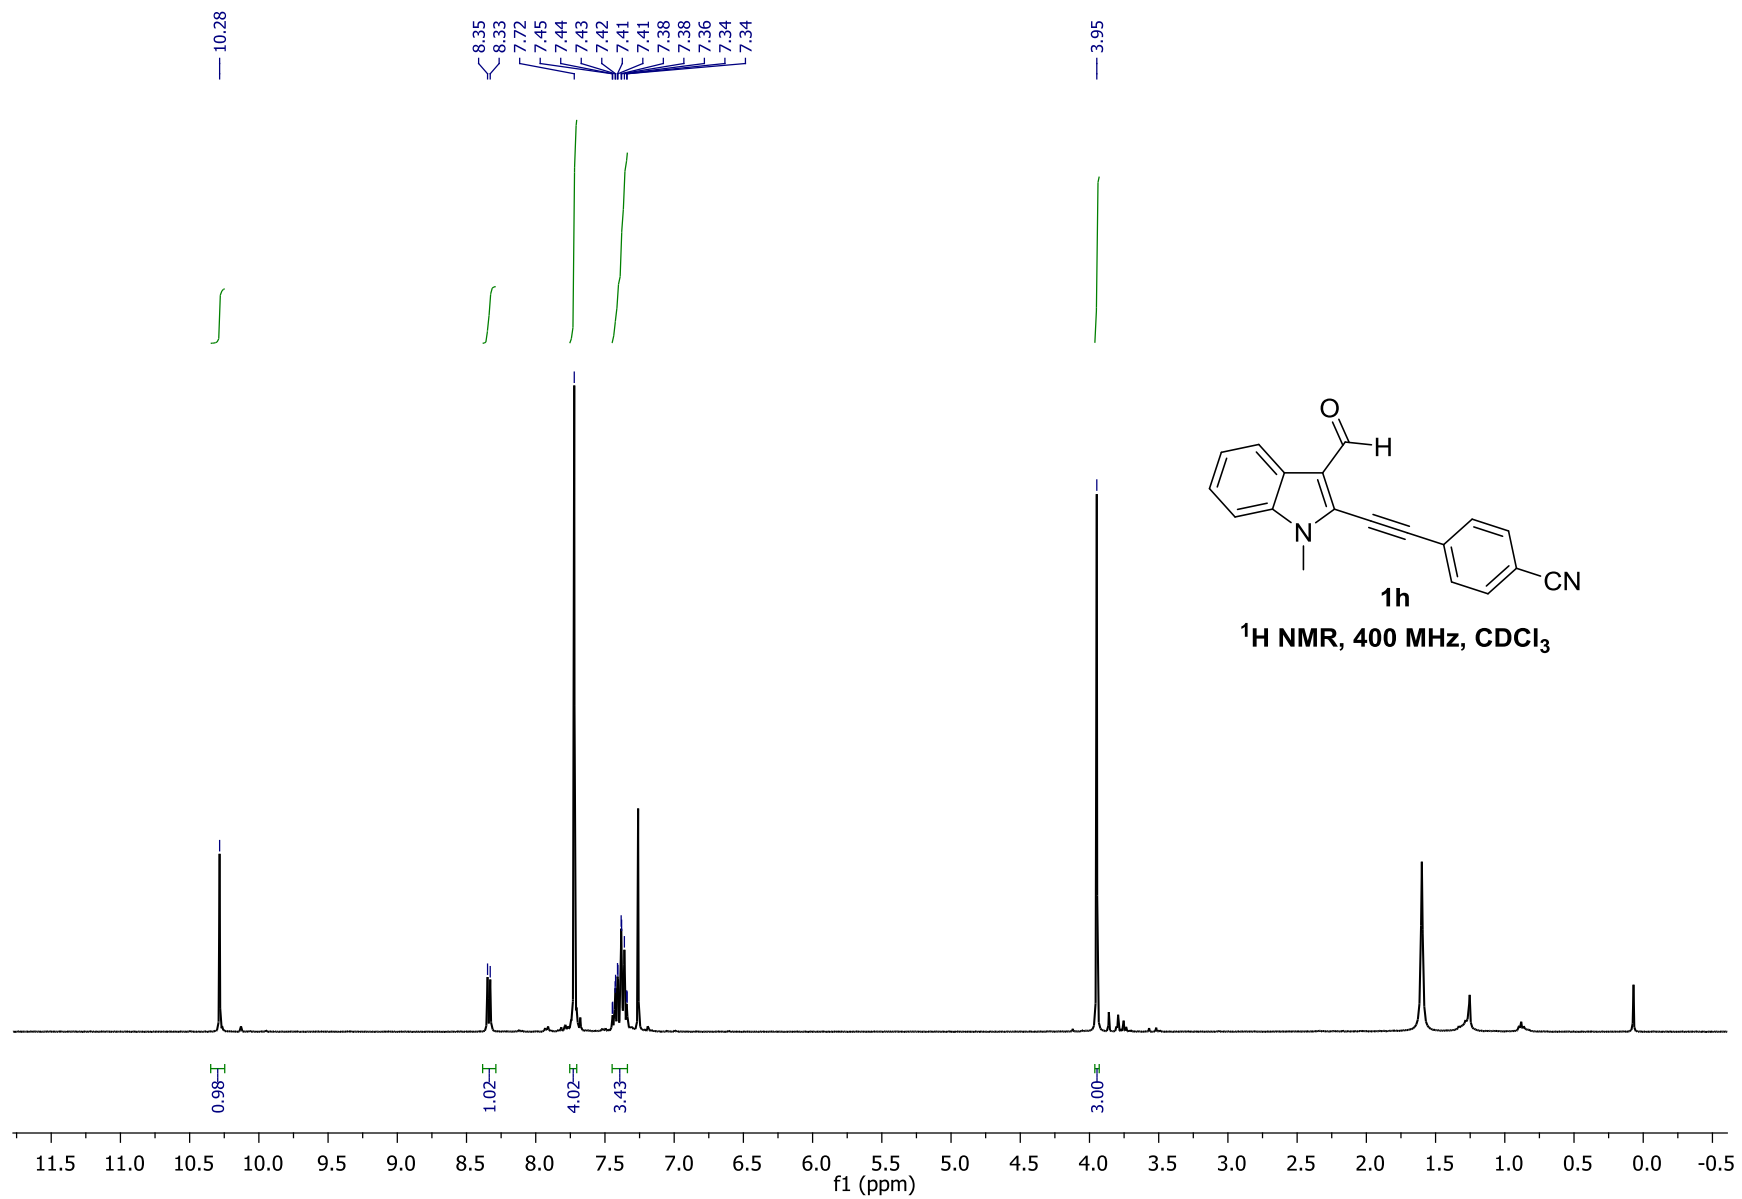



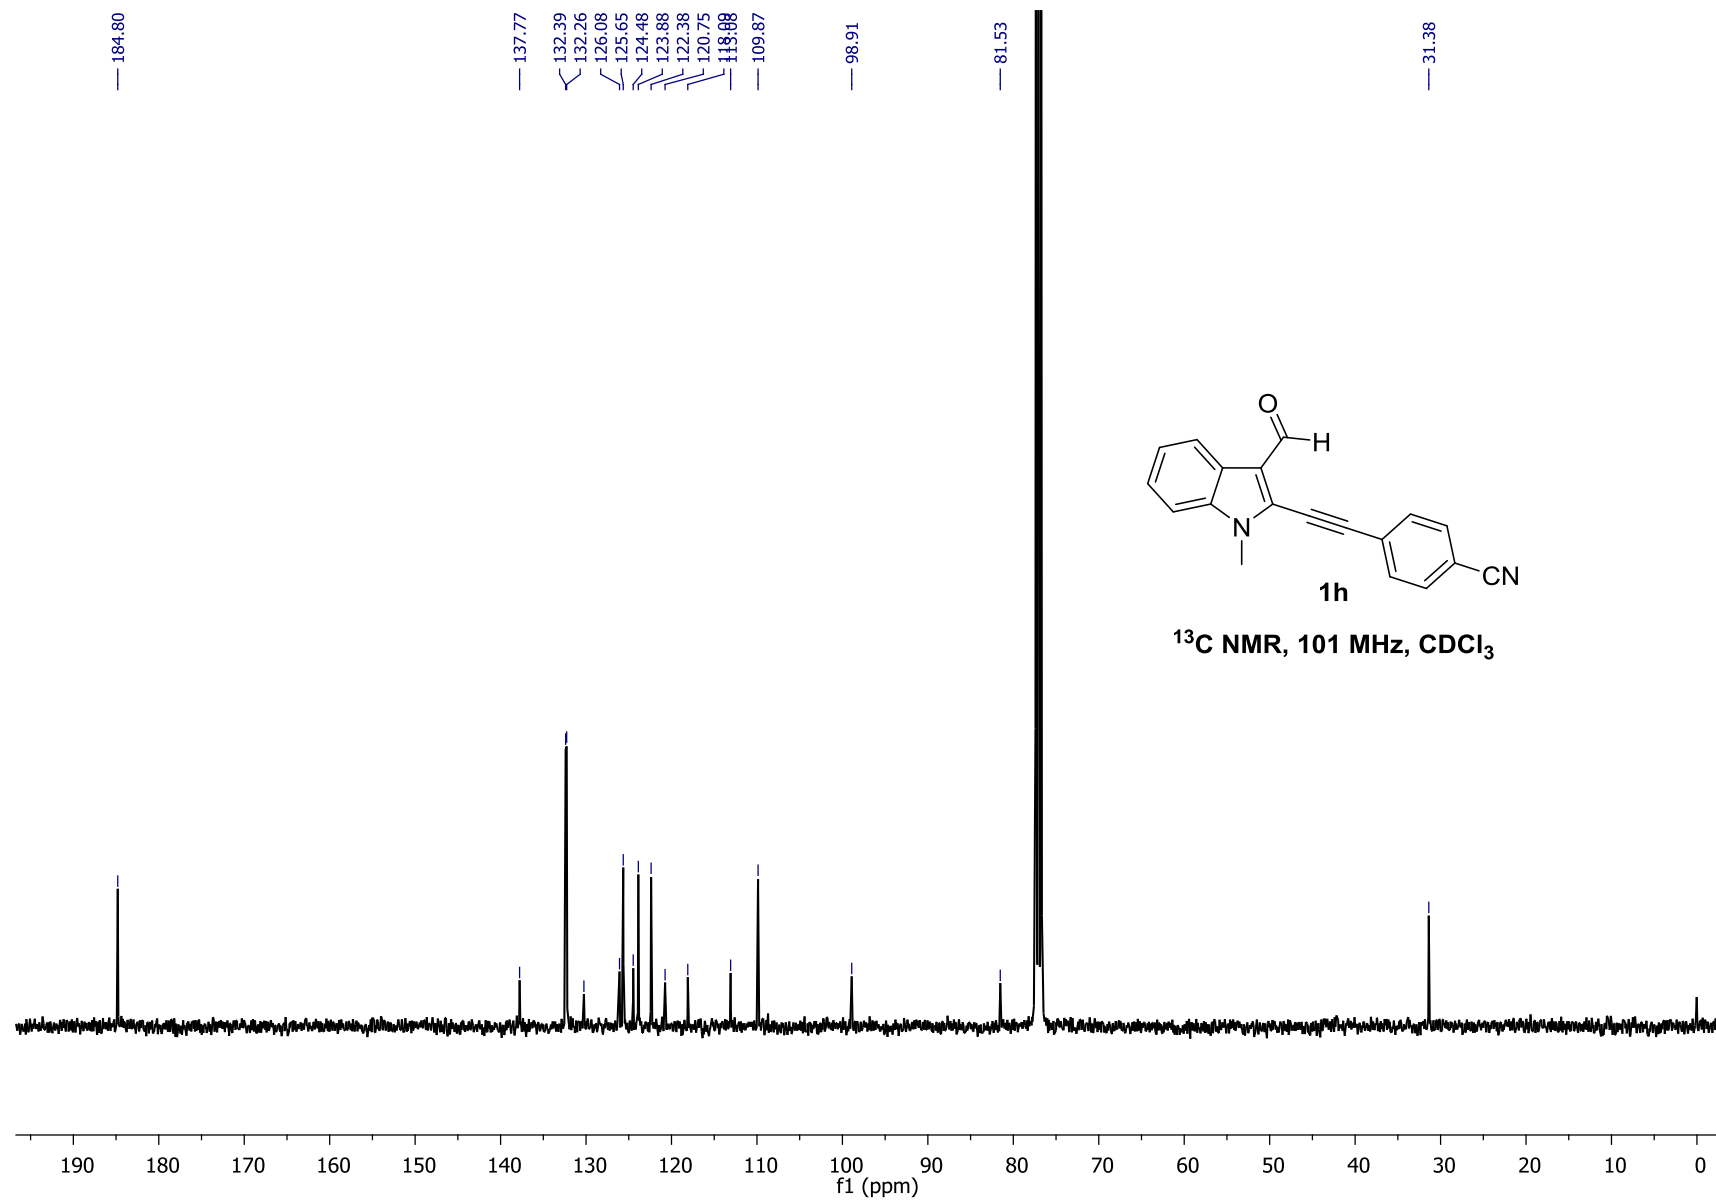

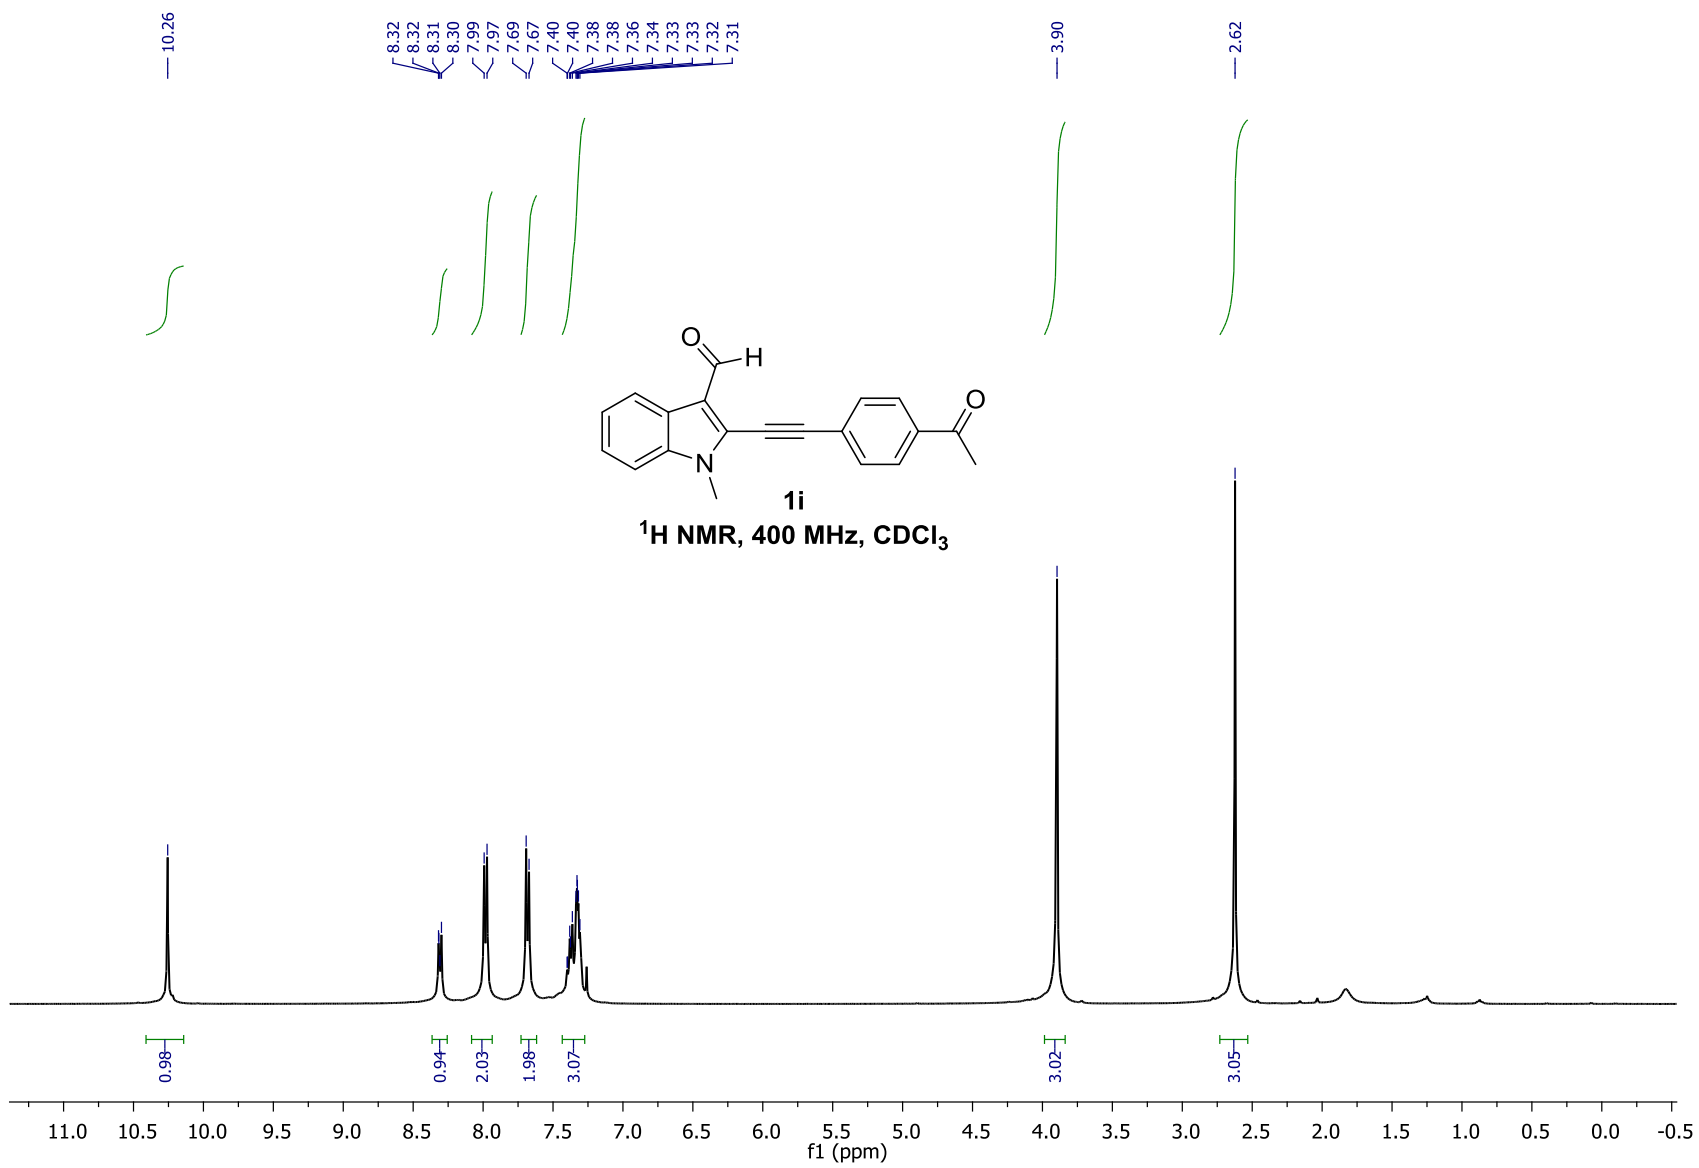

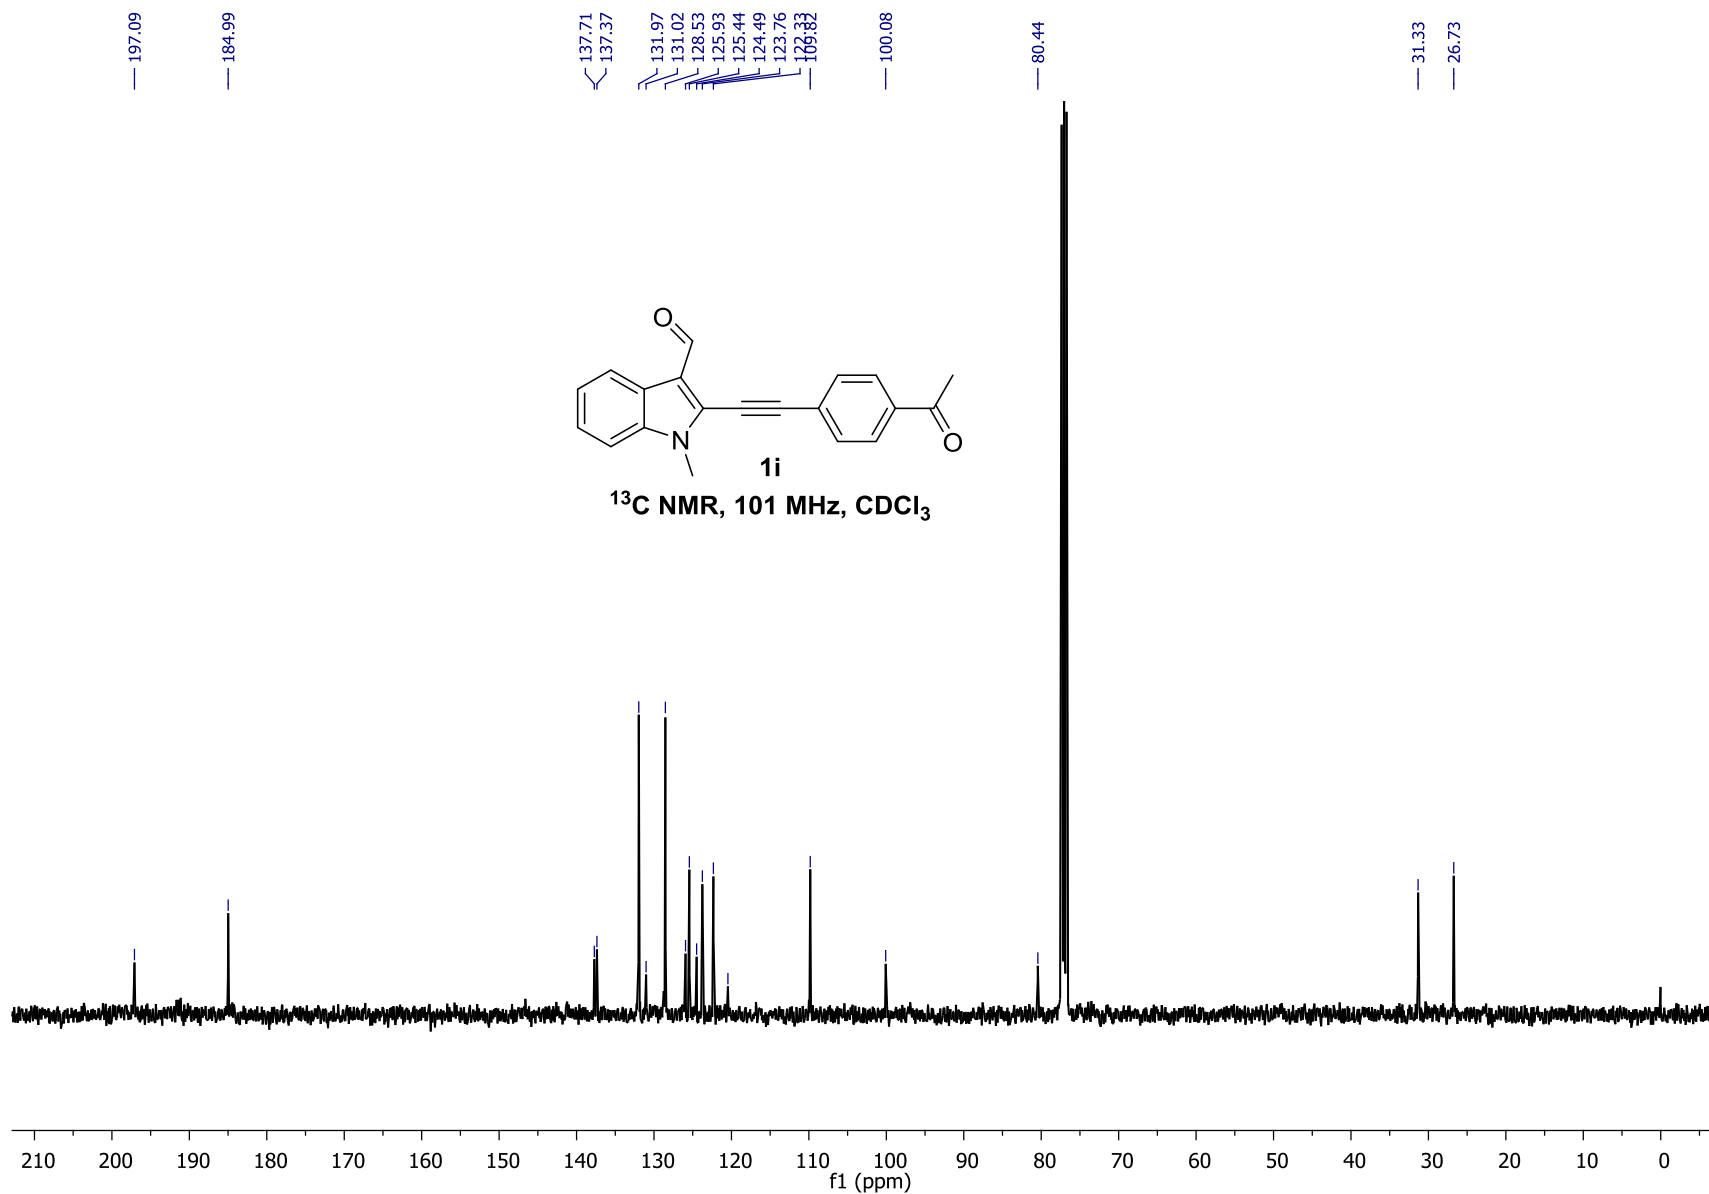

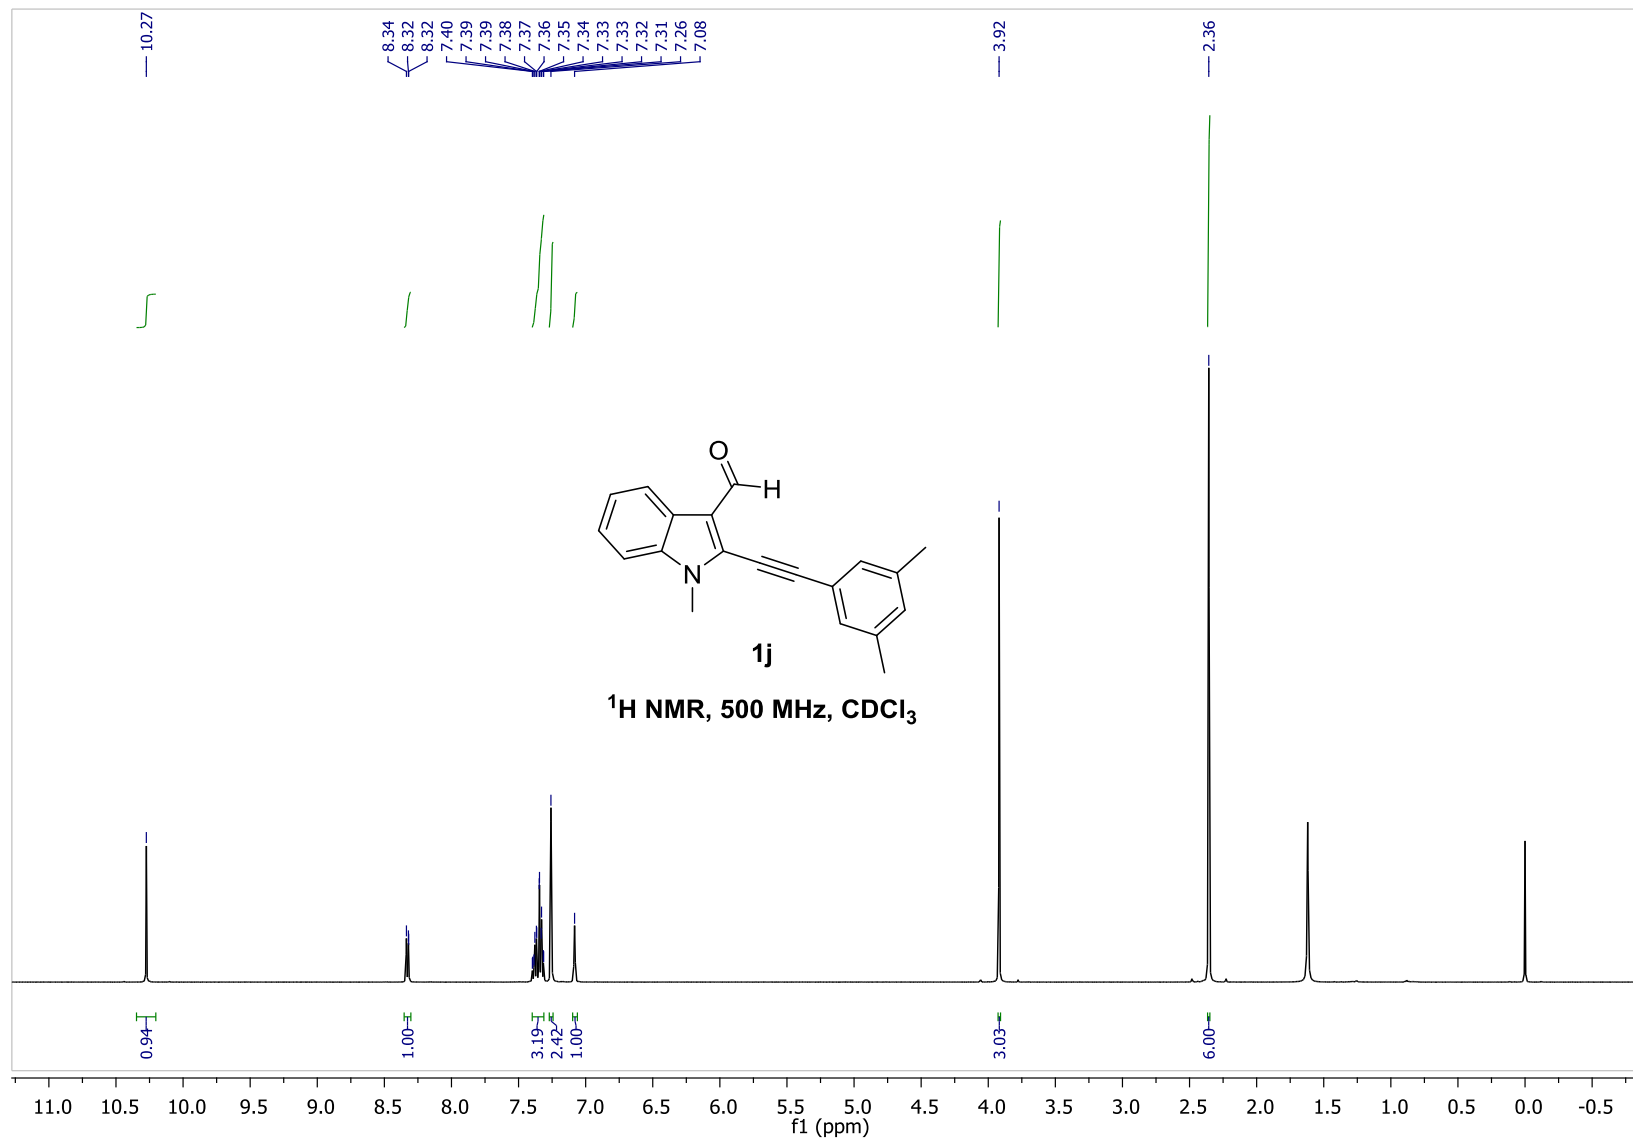

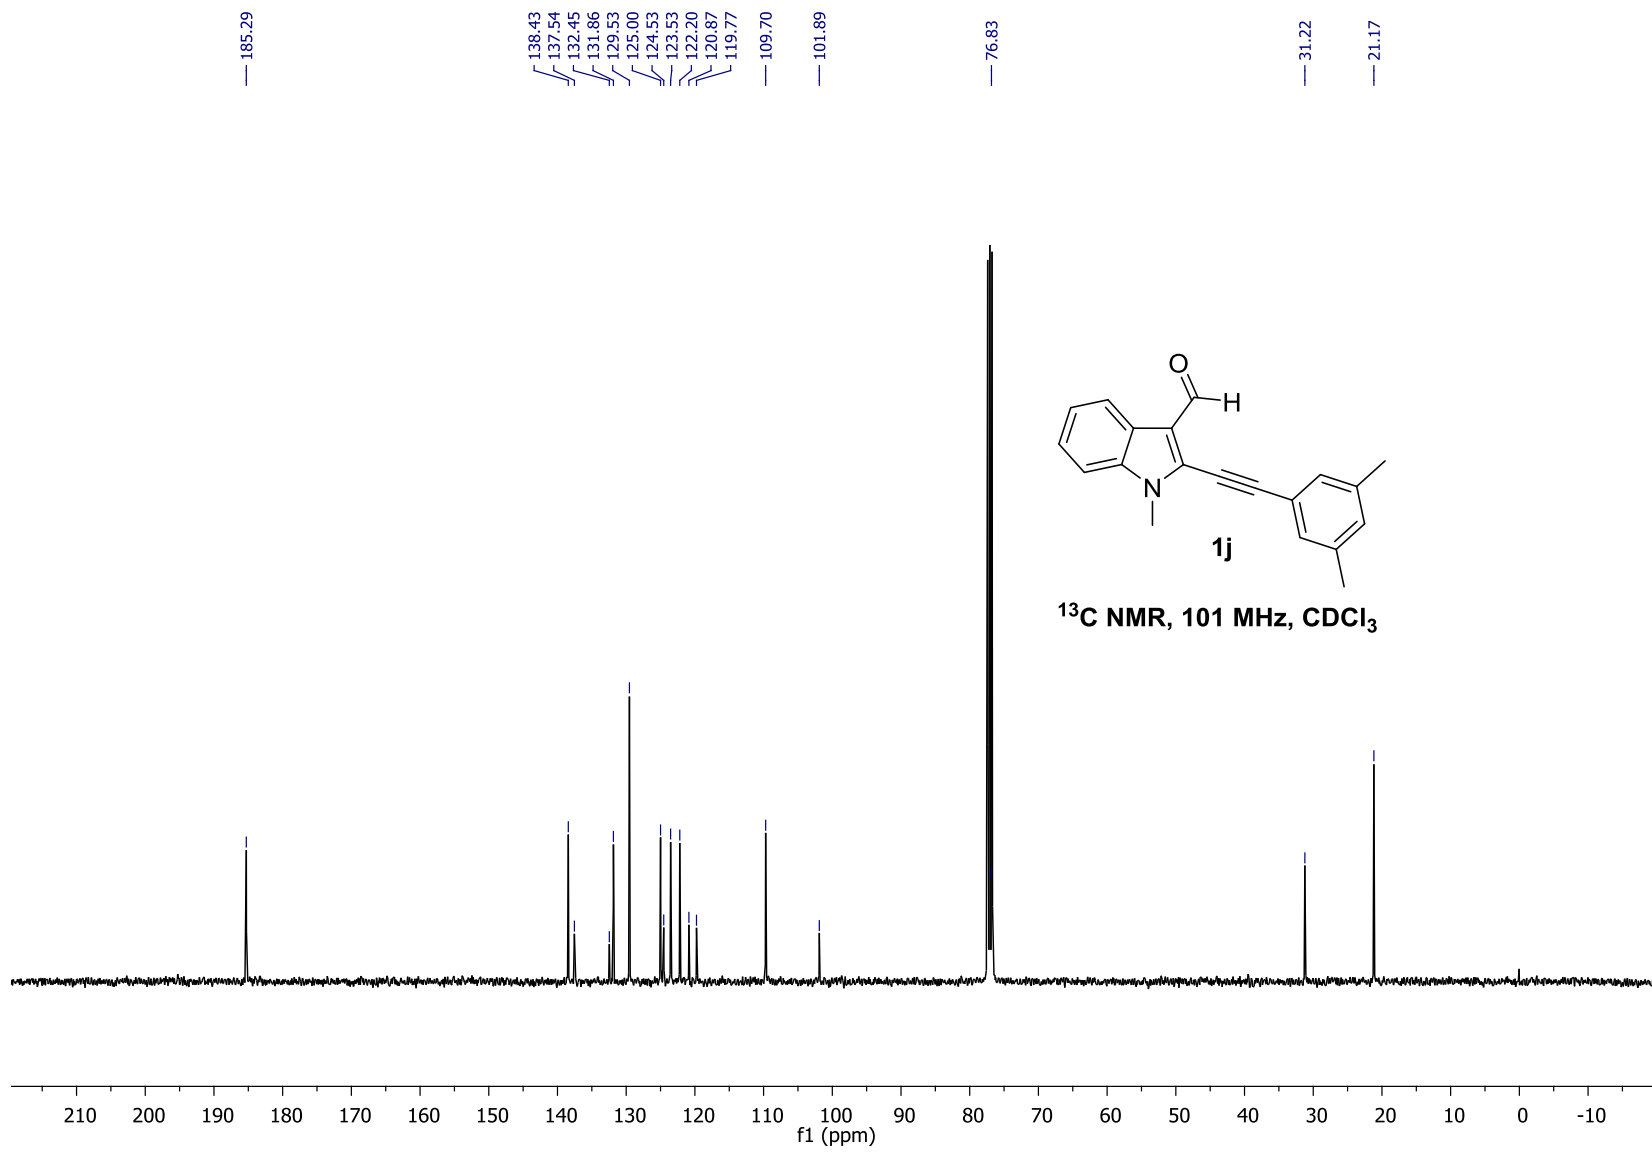

RAMCHANDRA-M0009

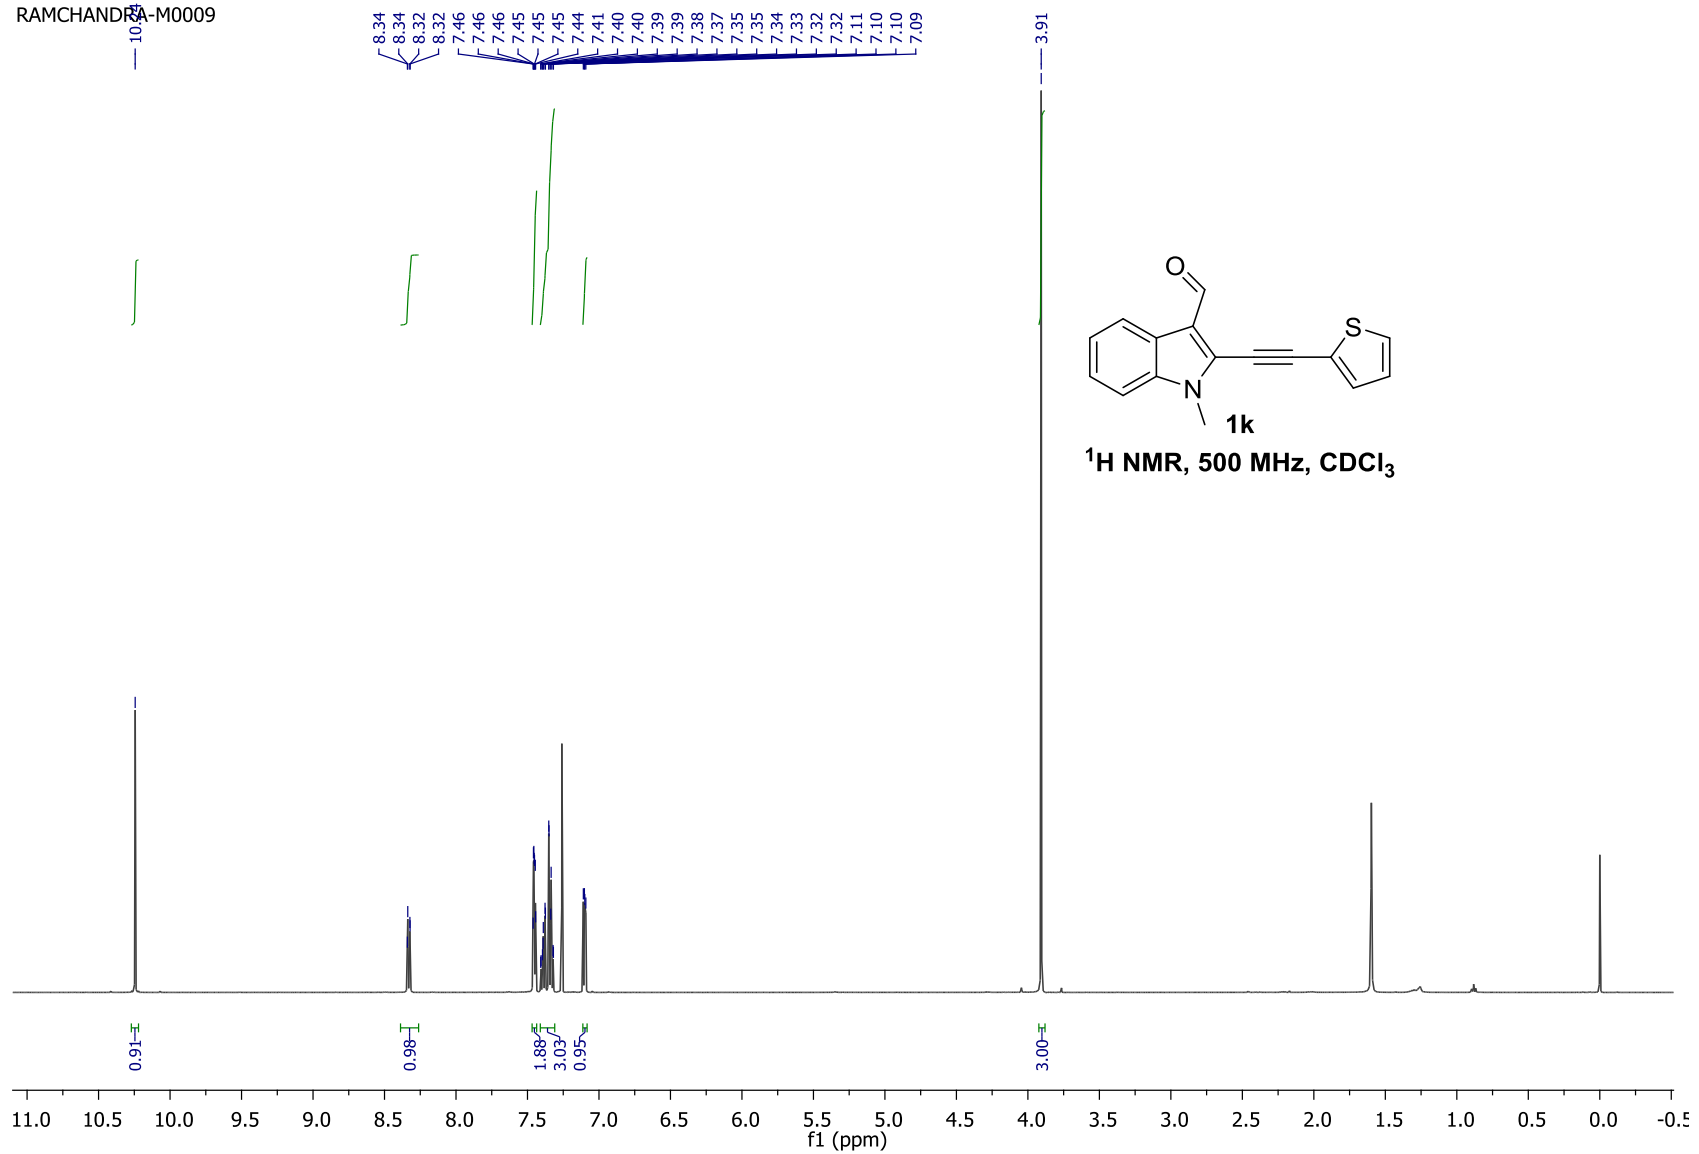

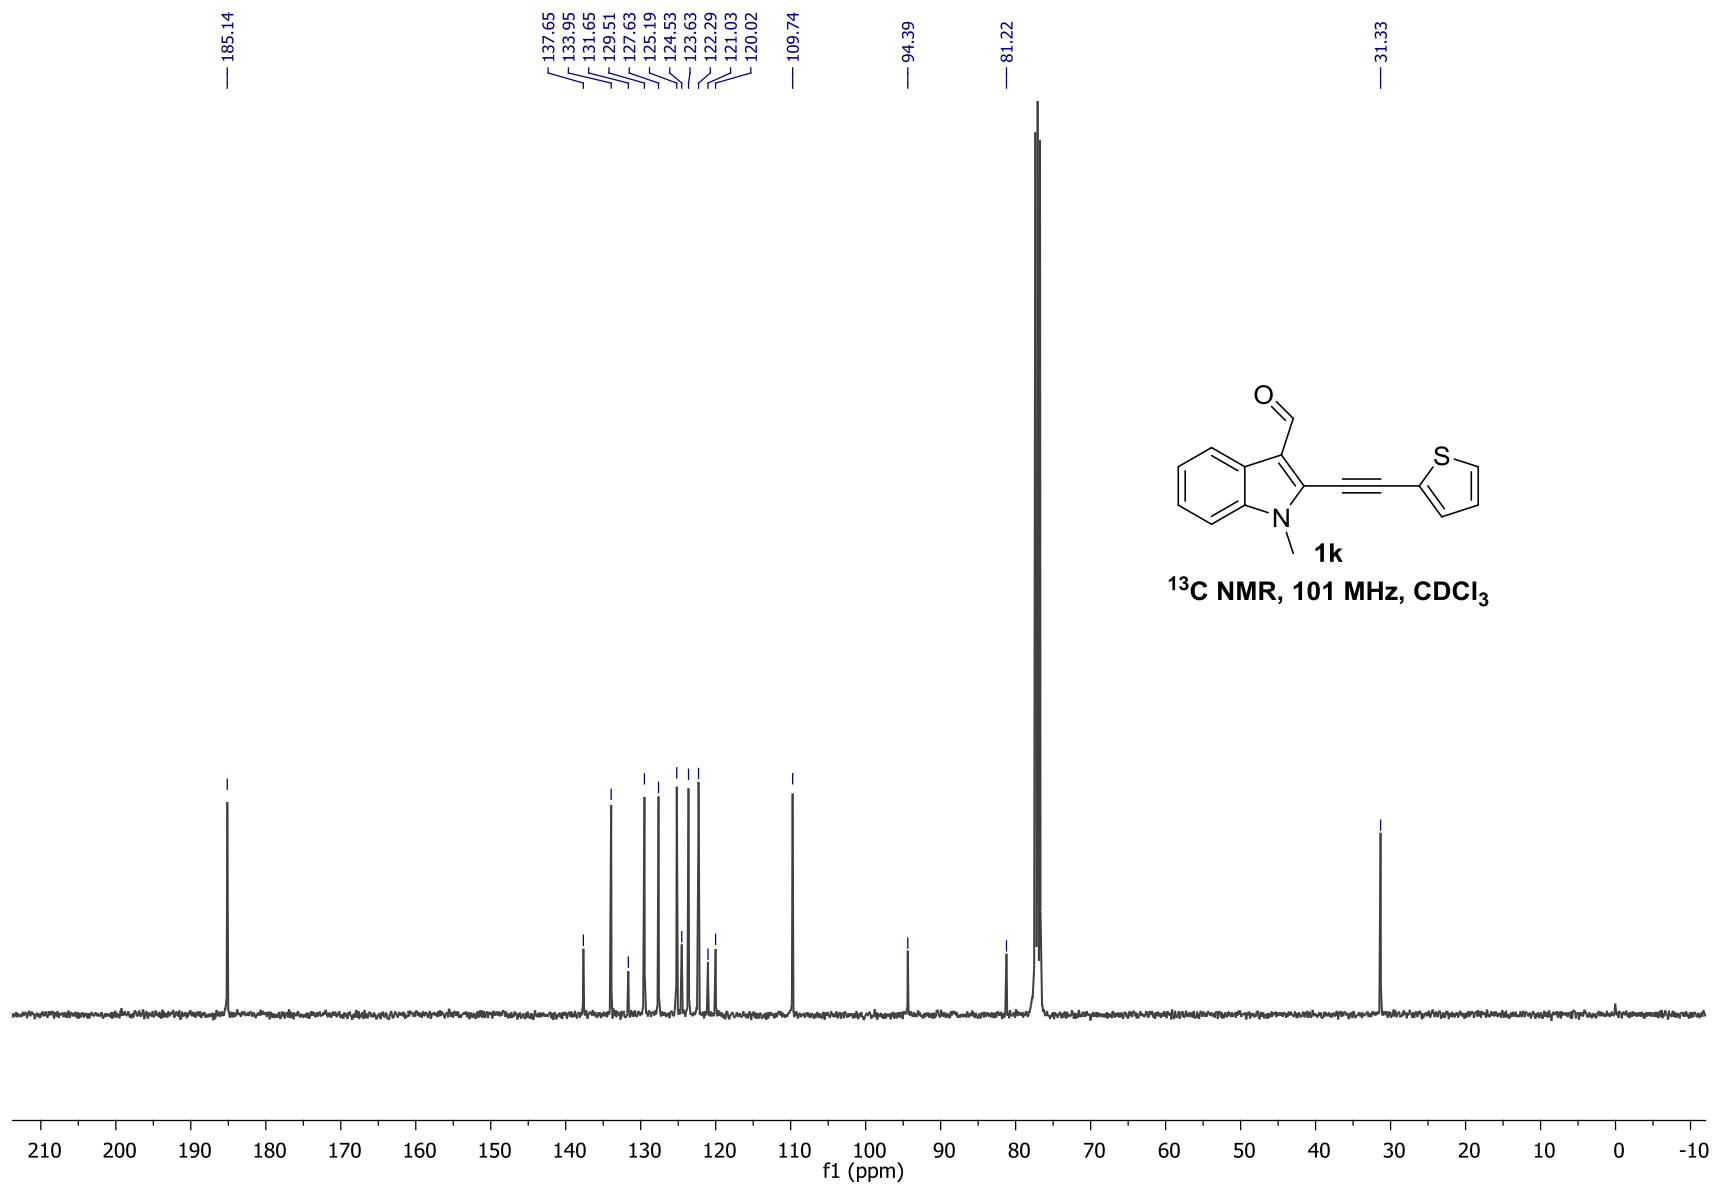

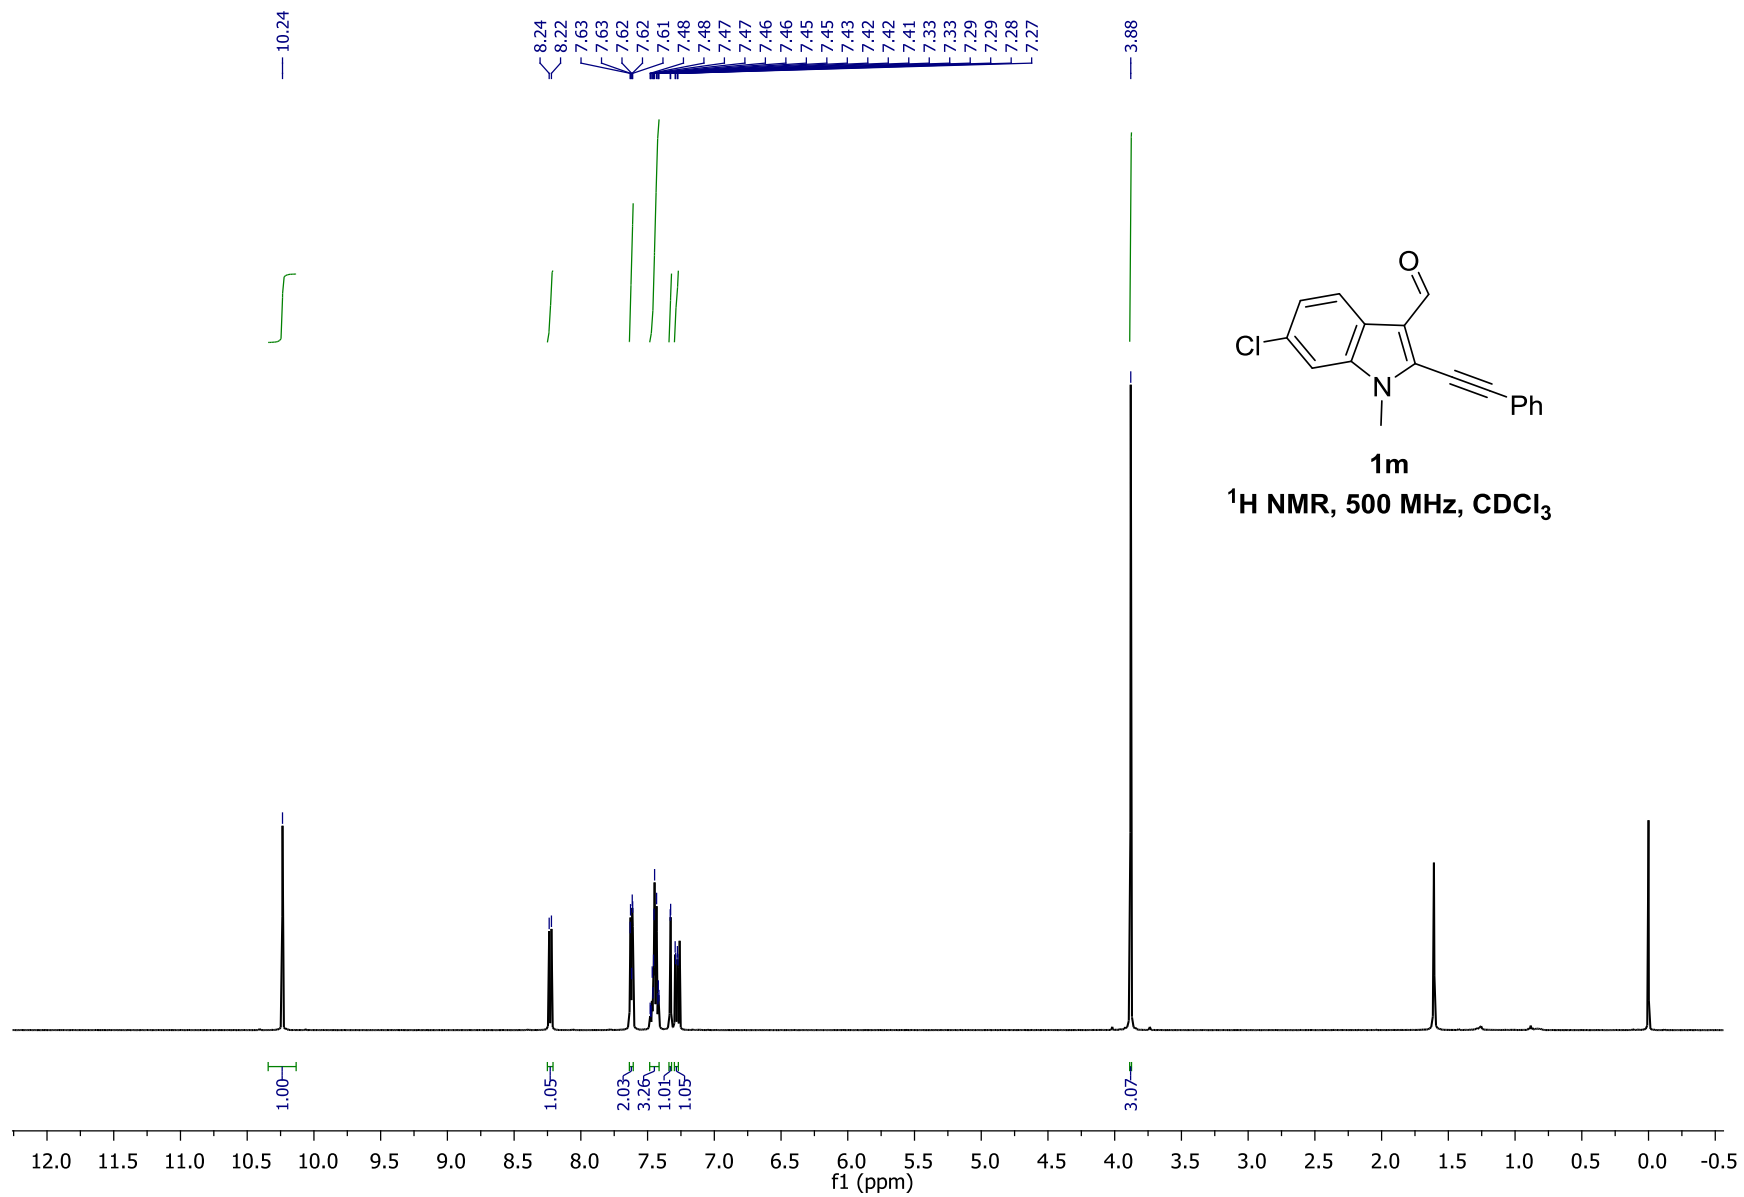



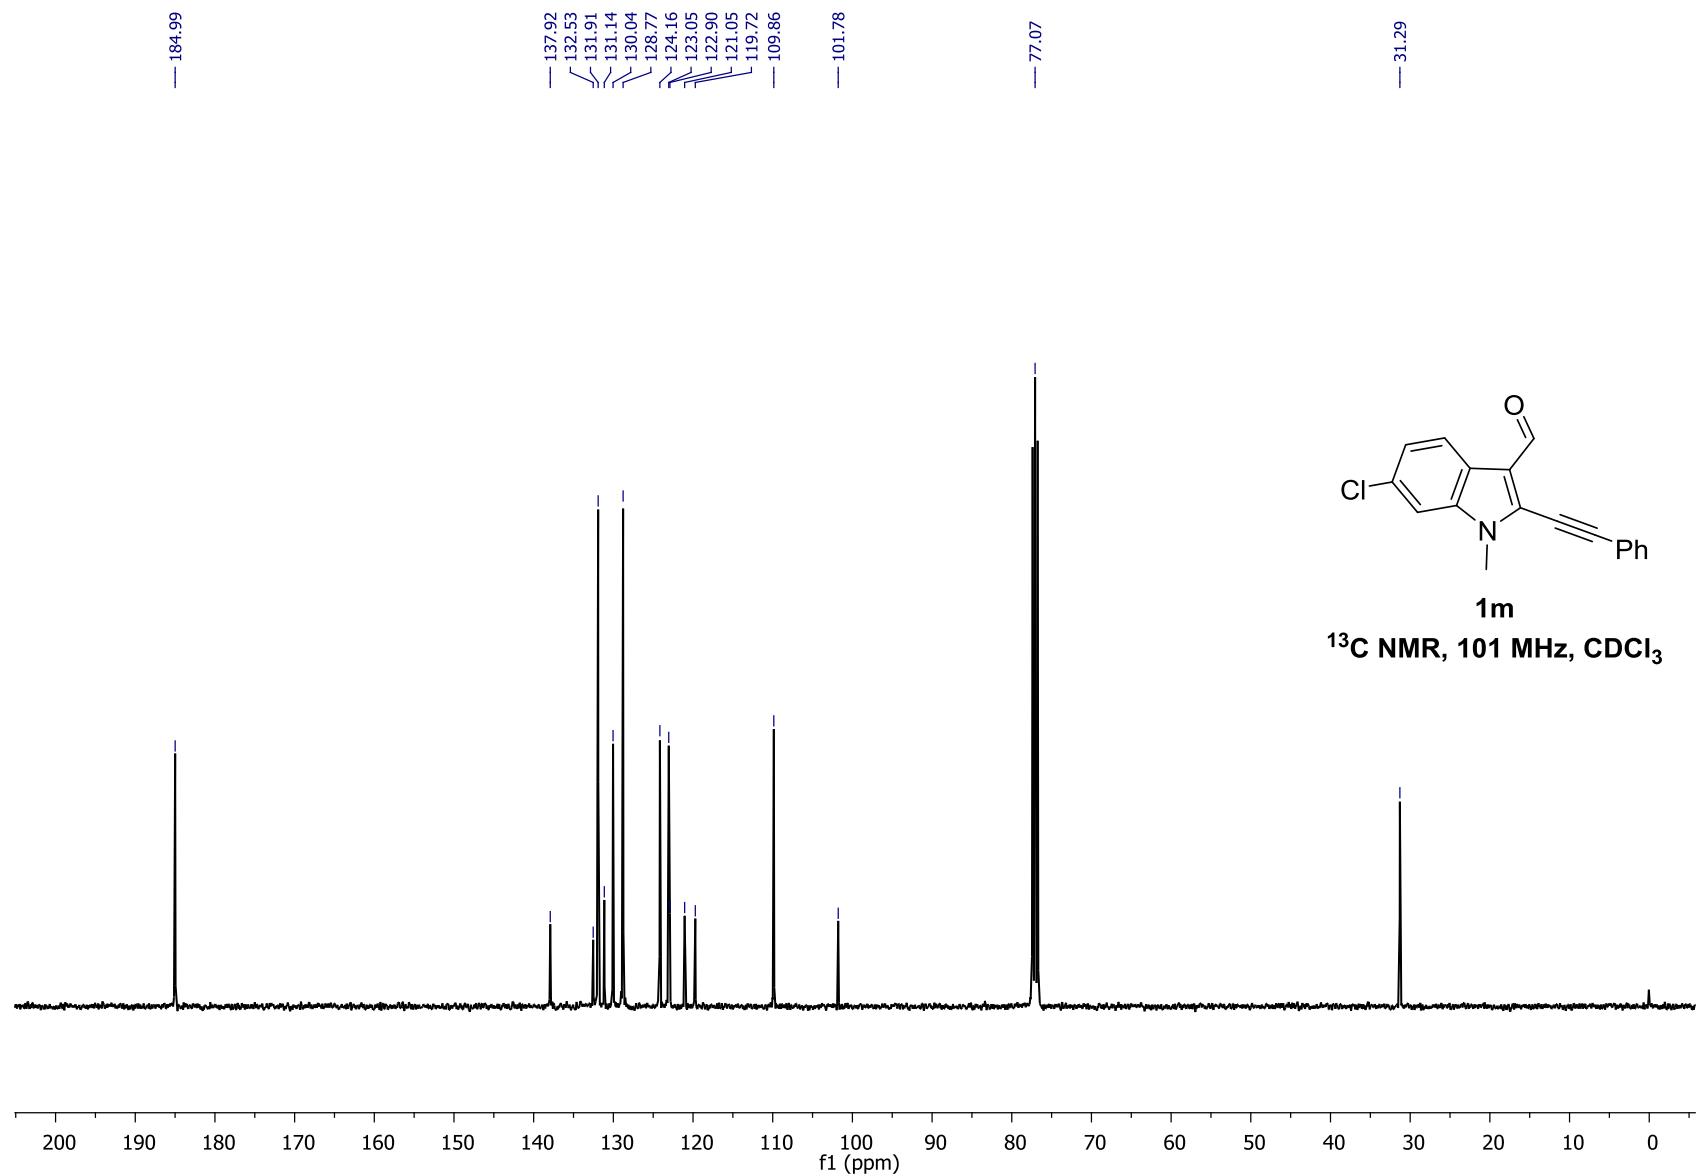

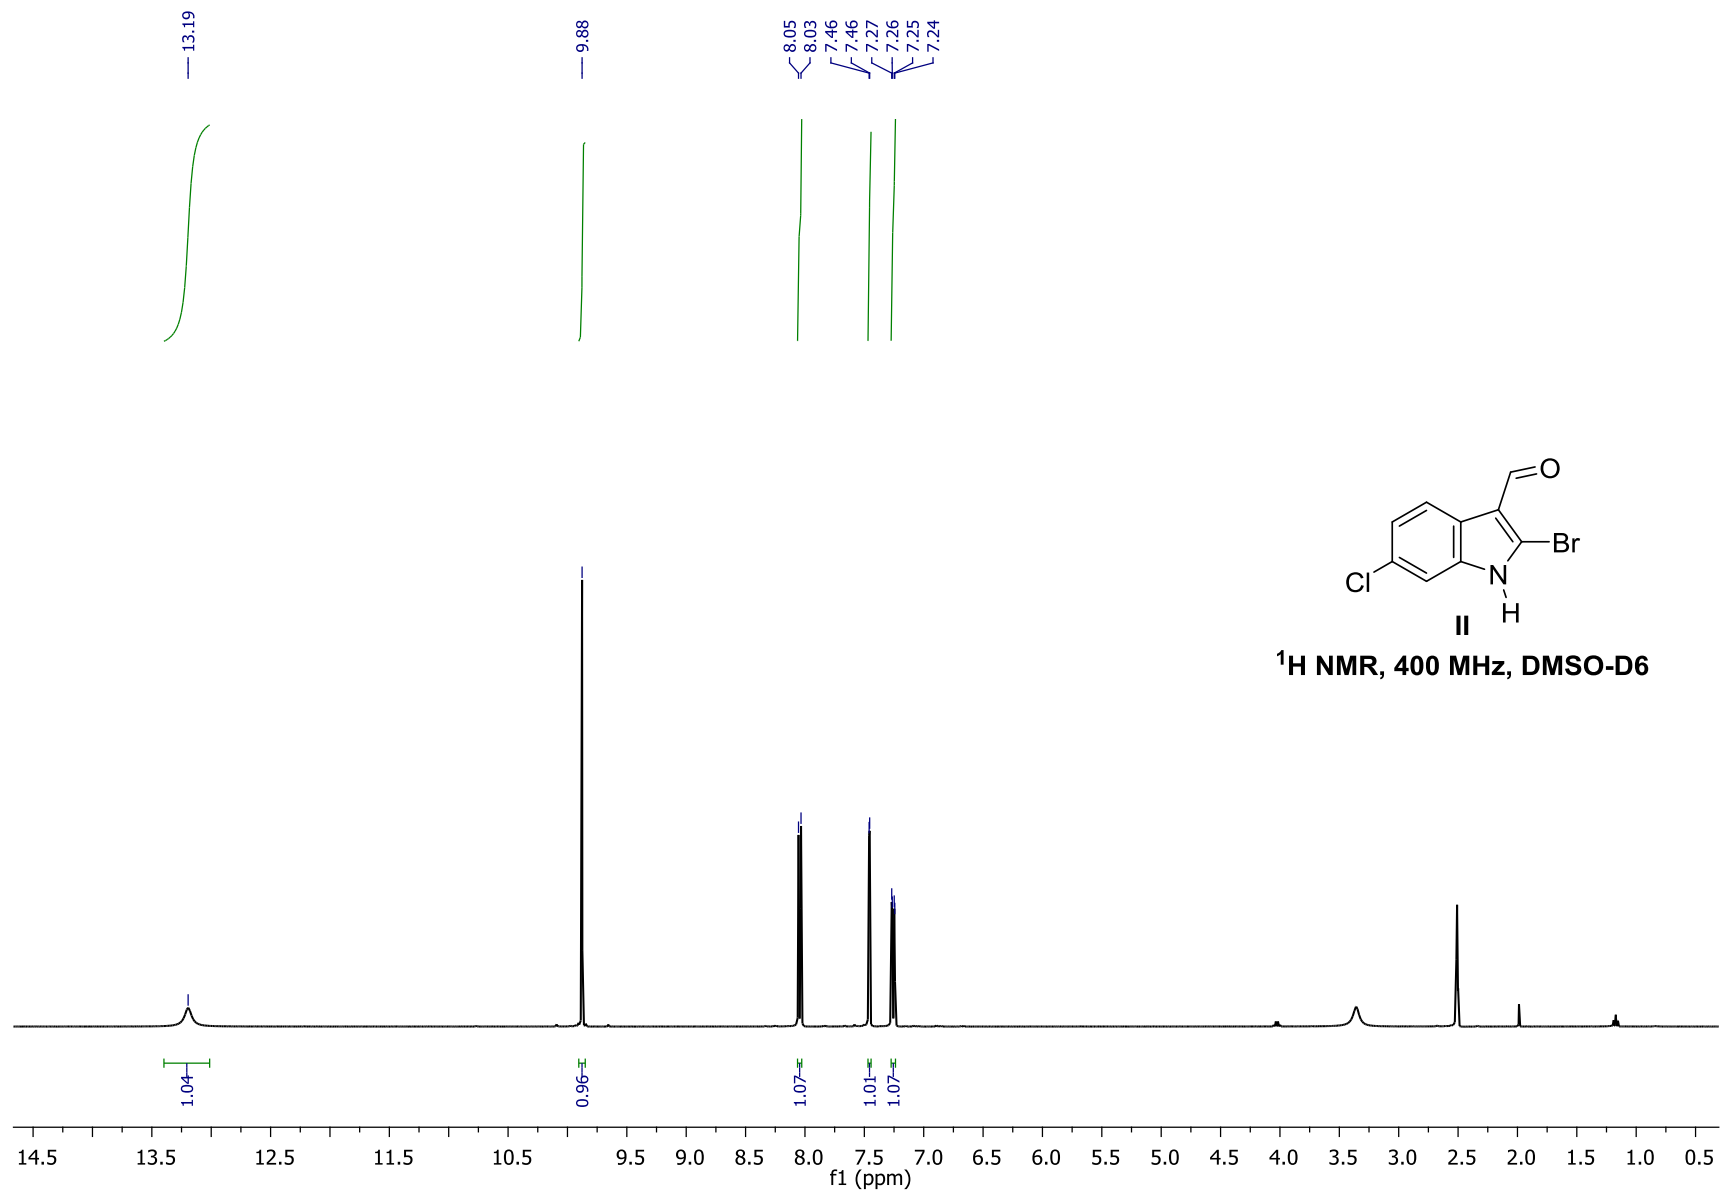

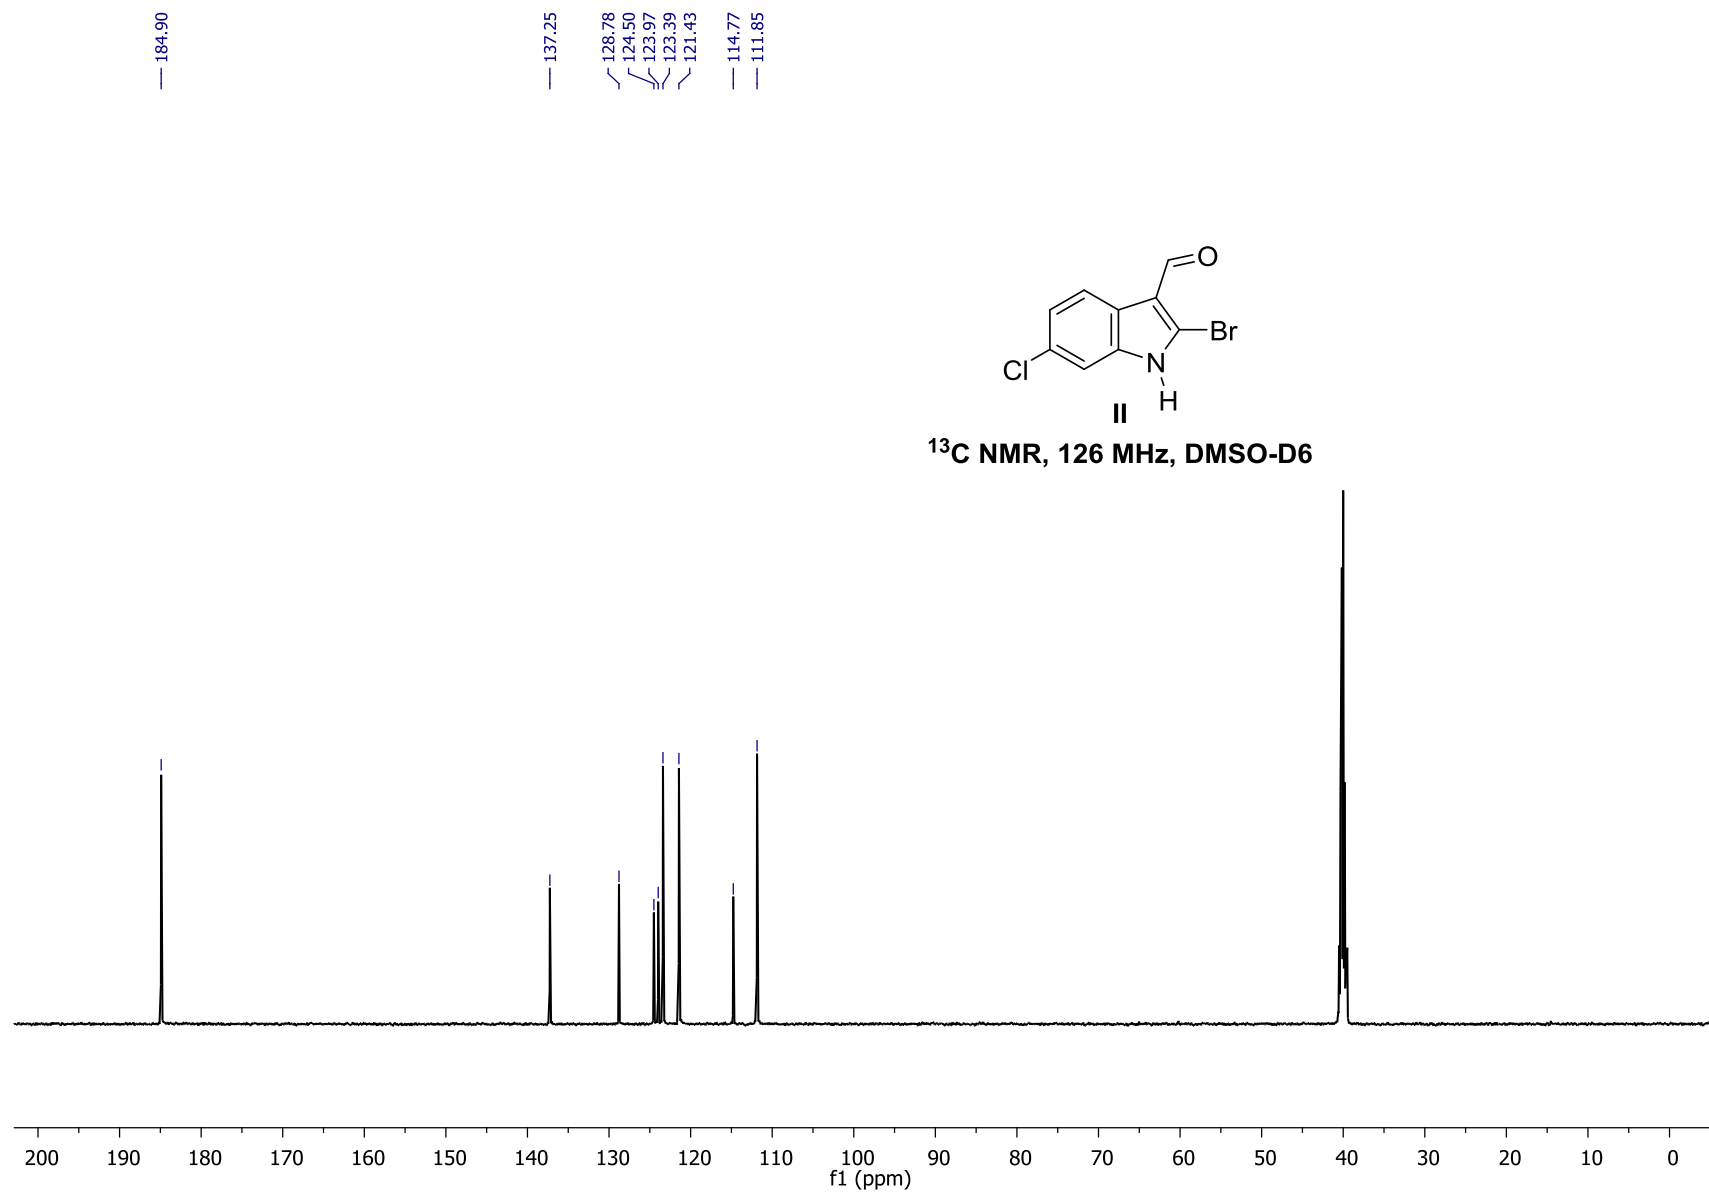

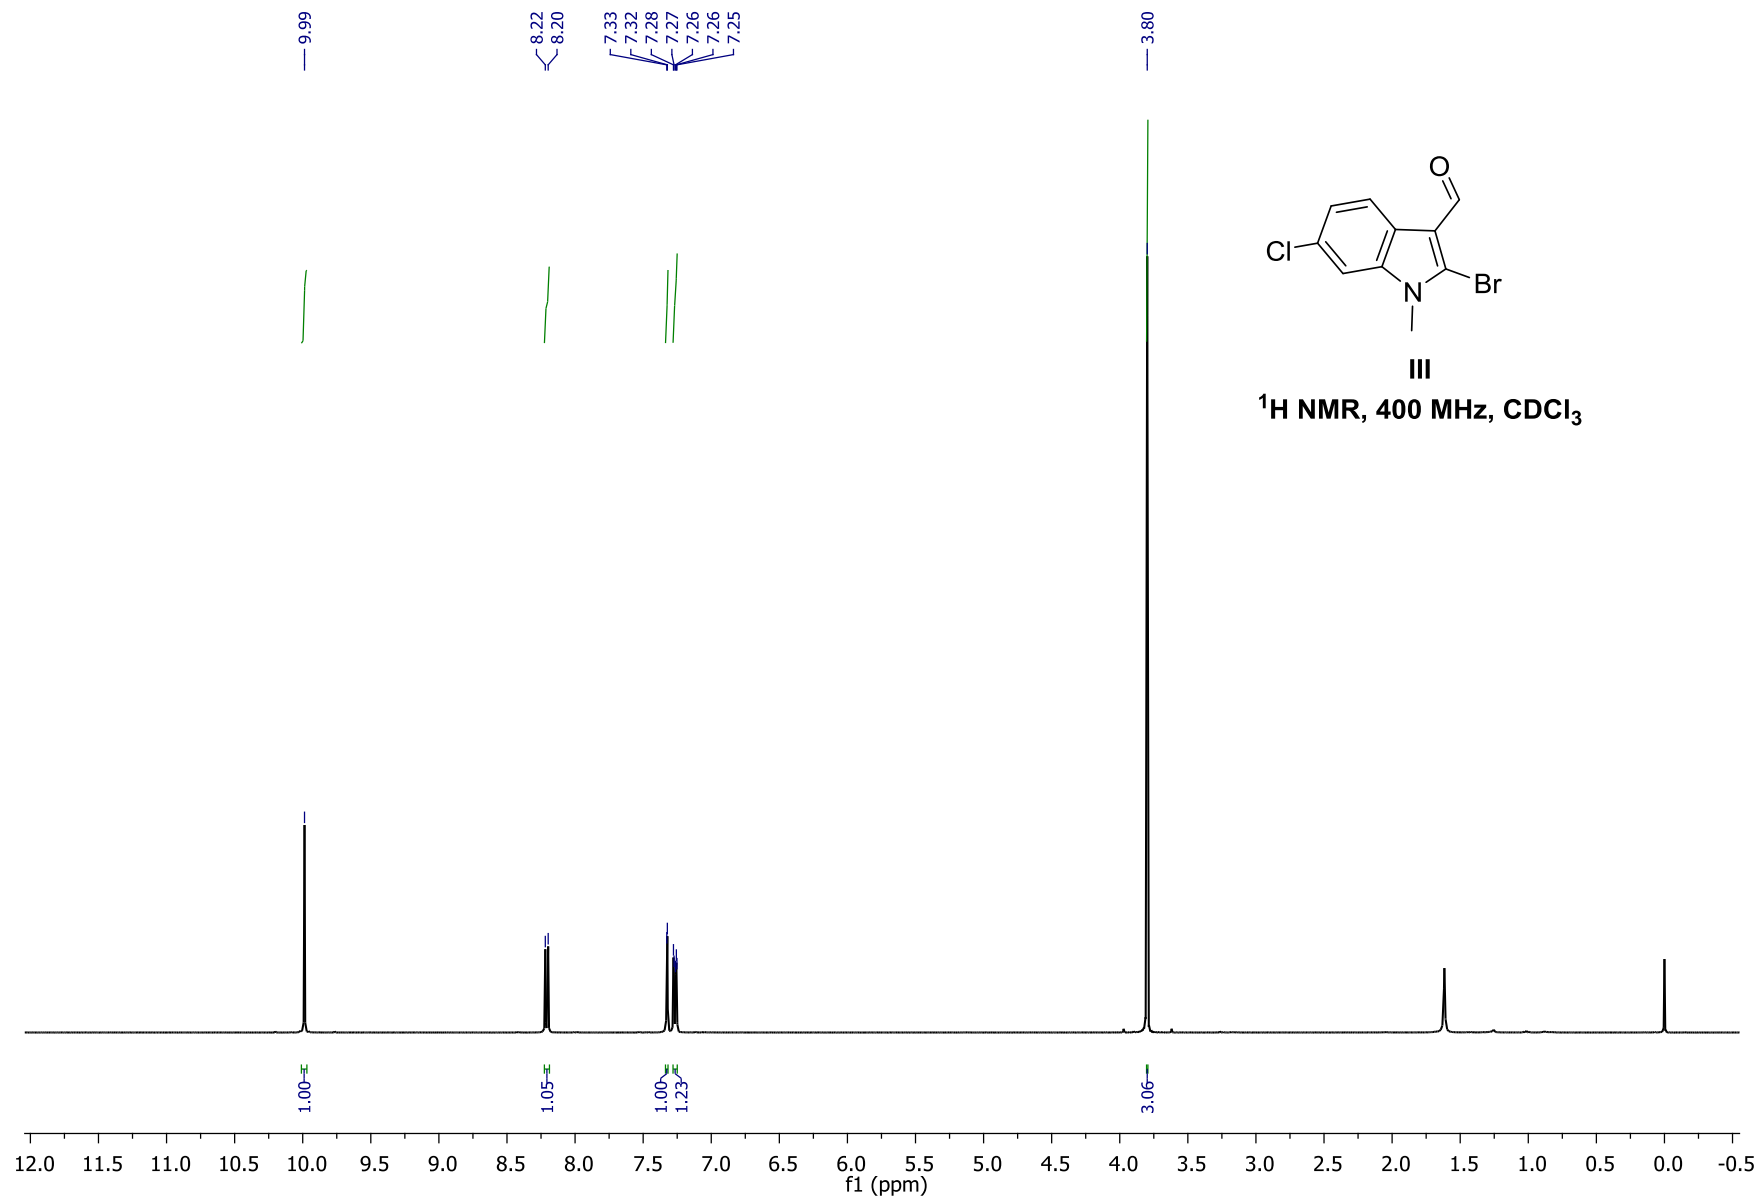

S20

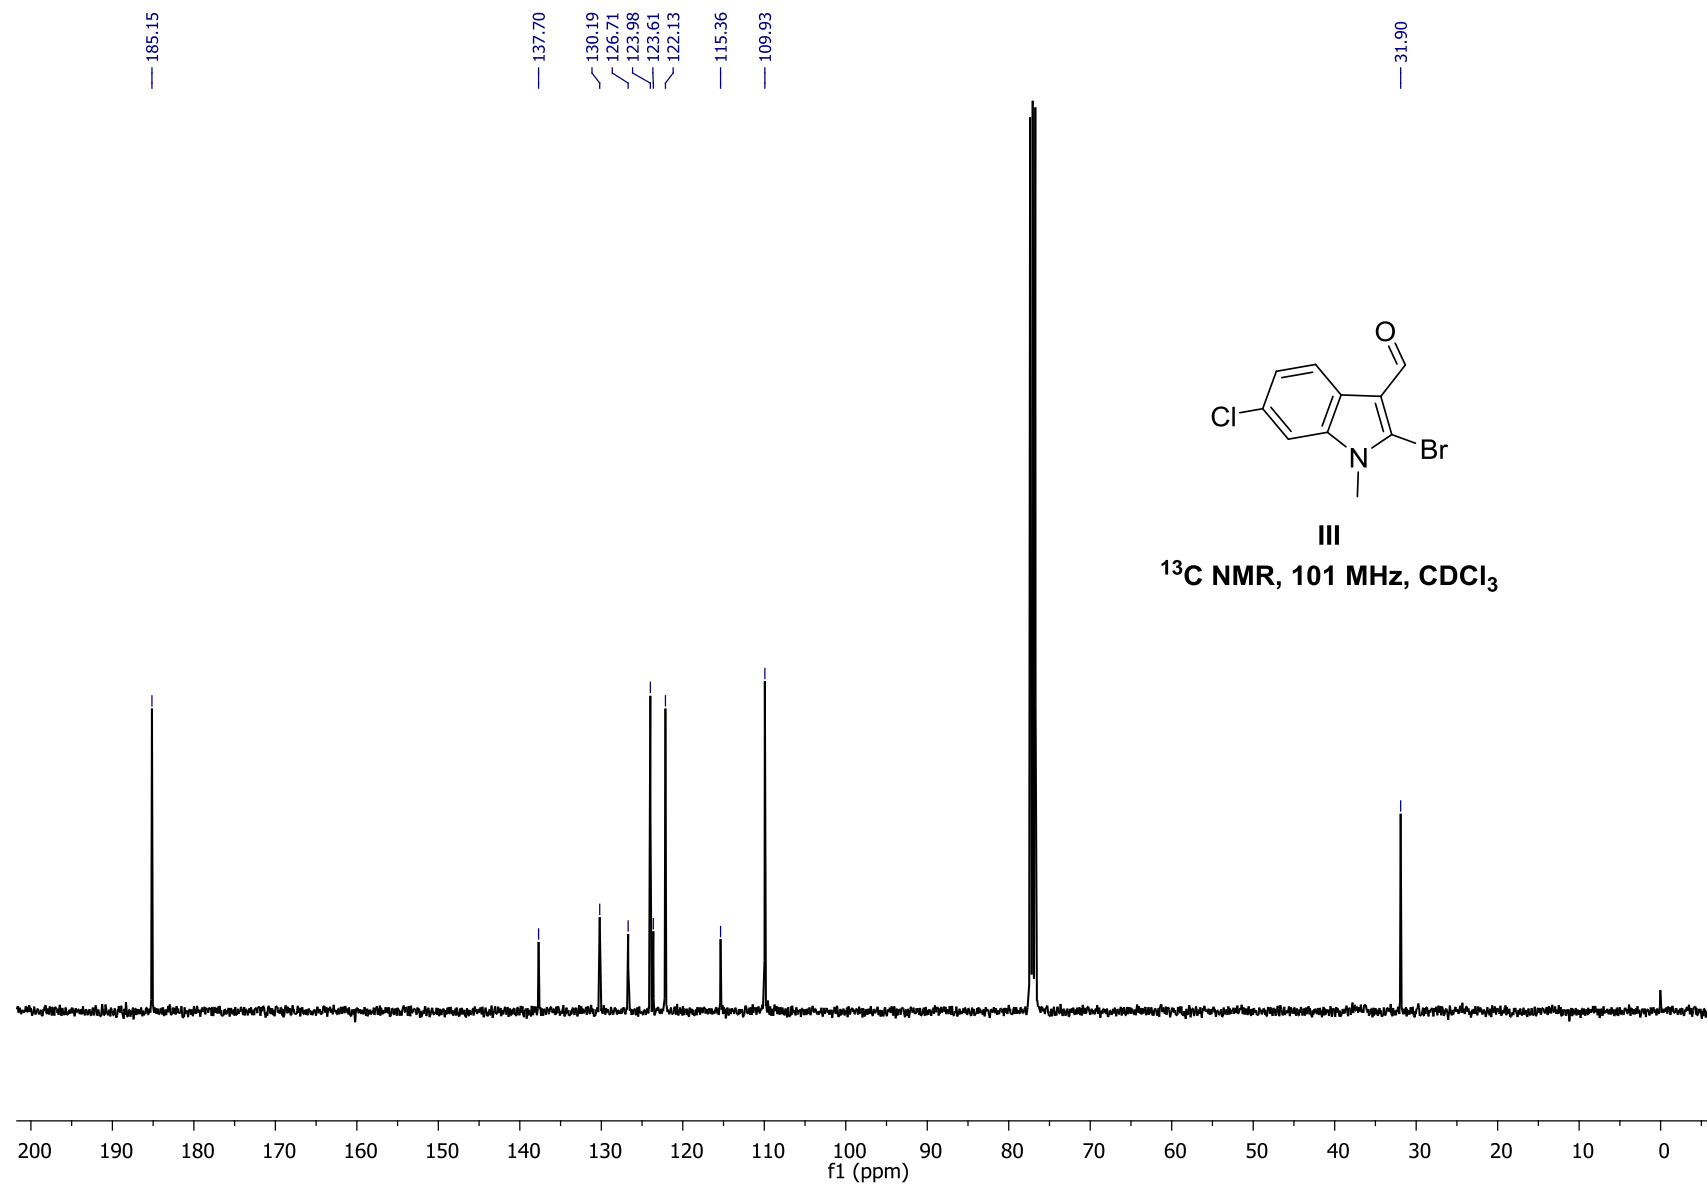

KARNA-M0009

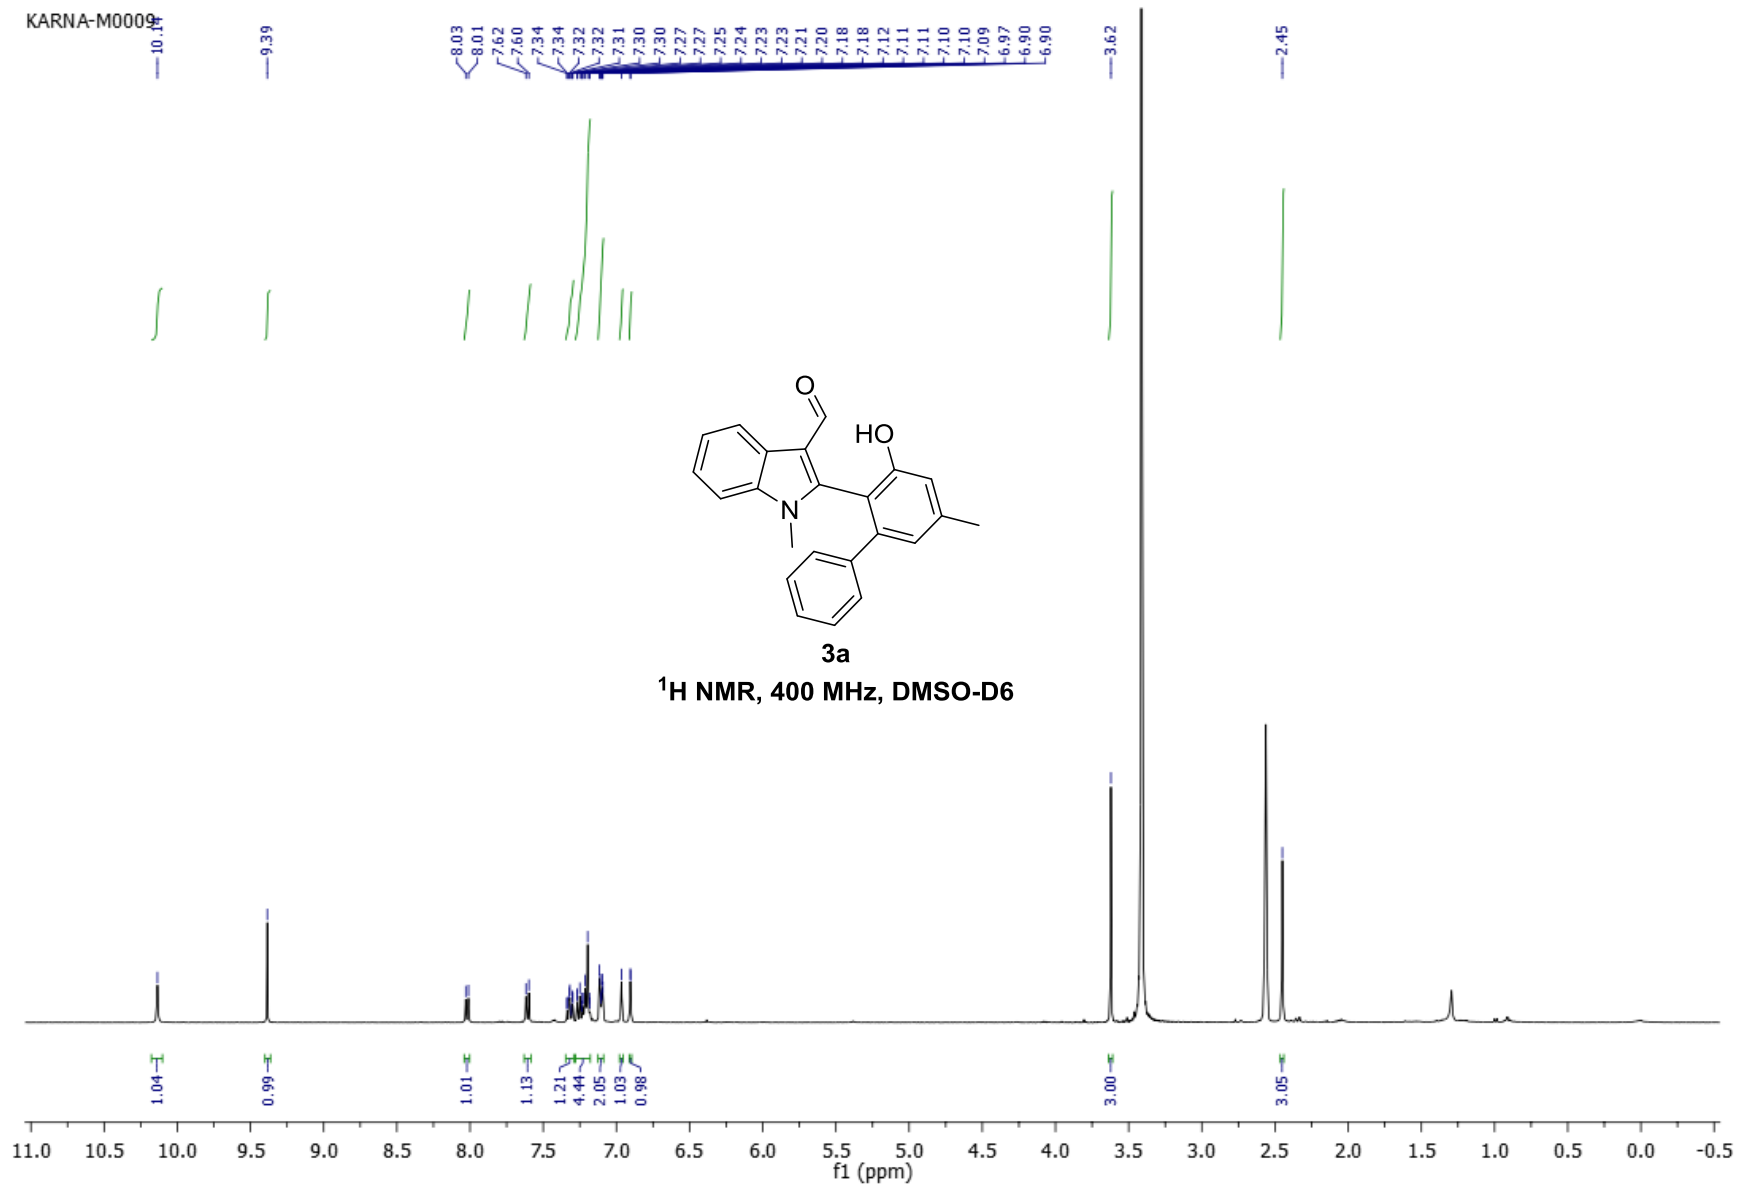

KARNA-M0009

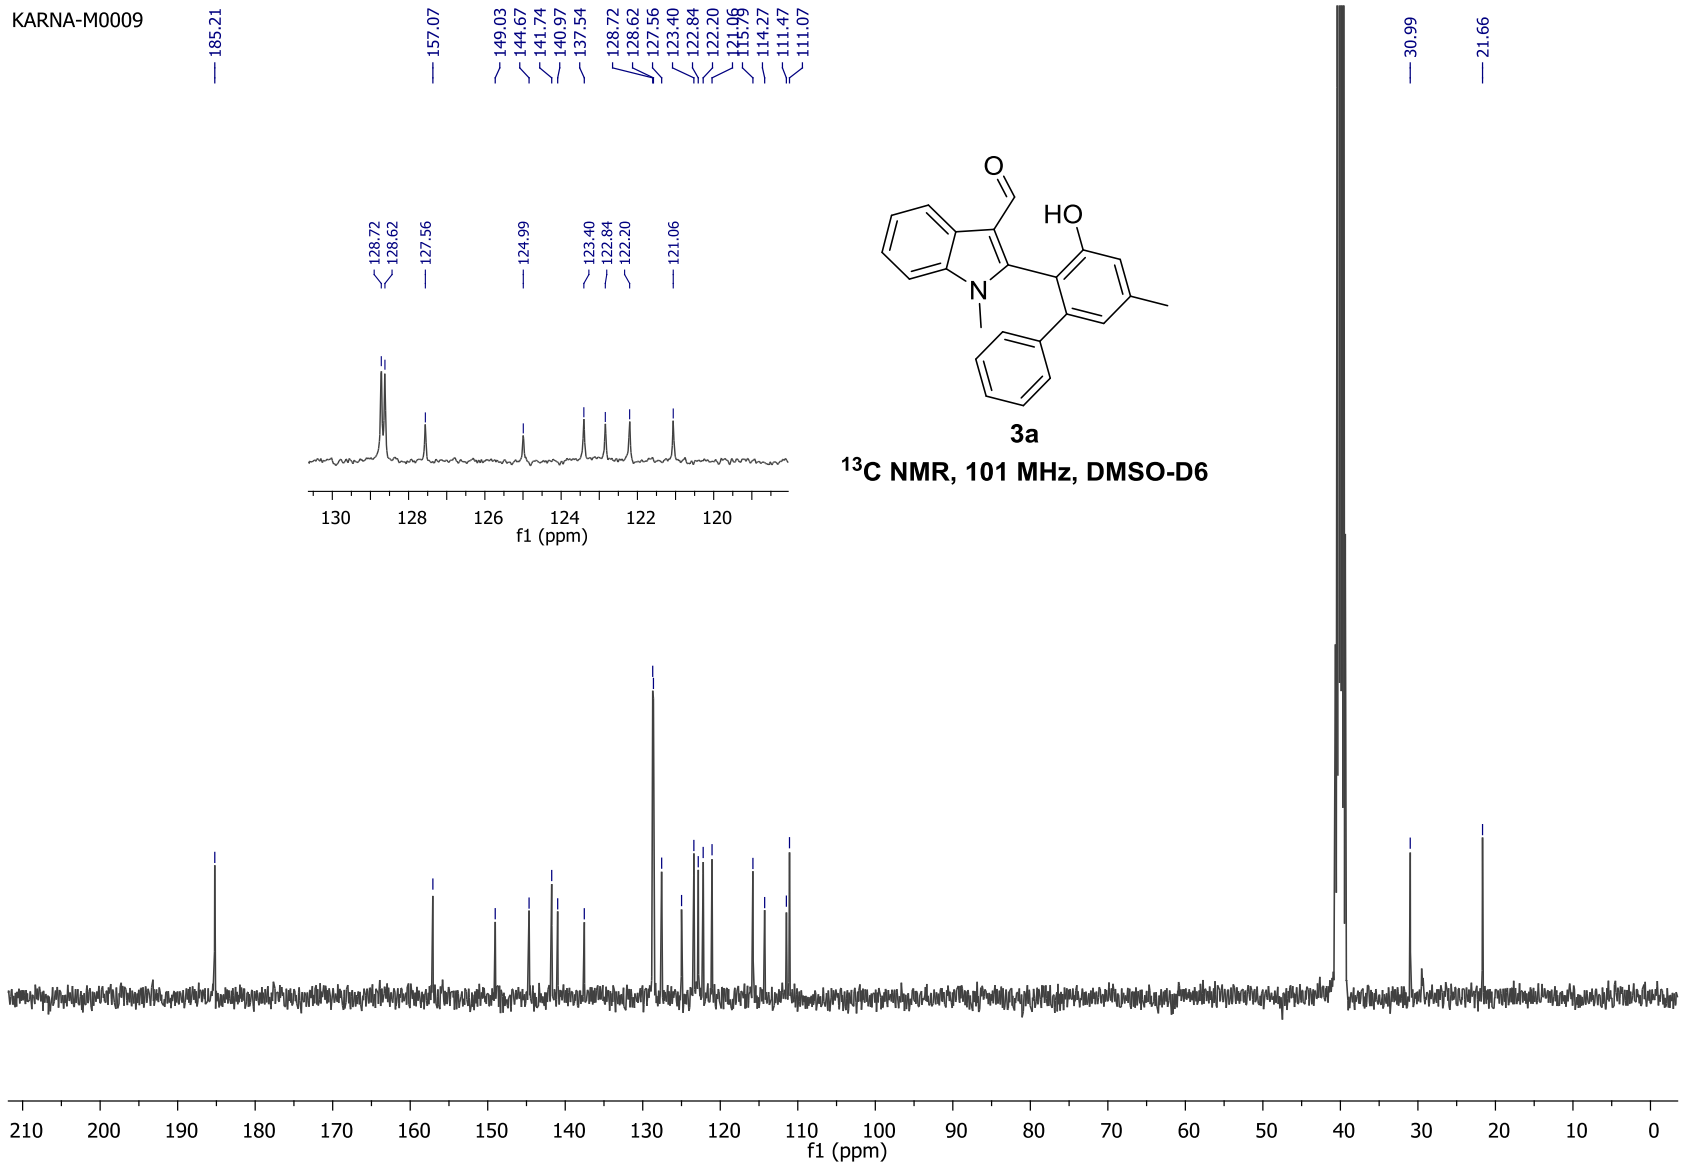

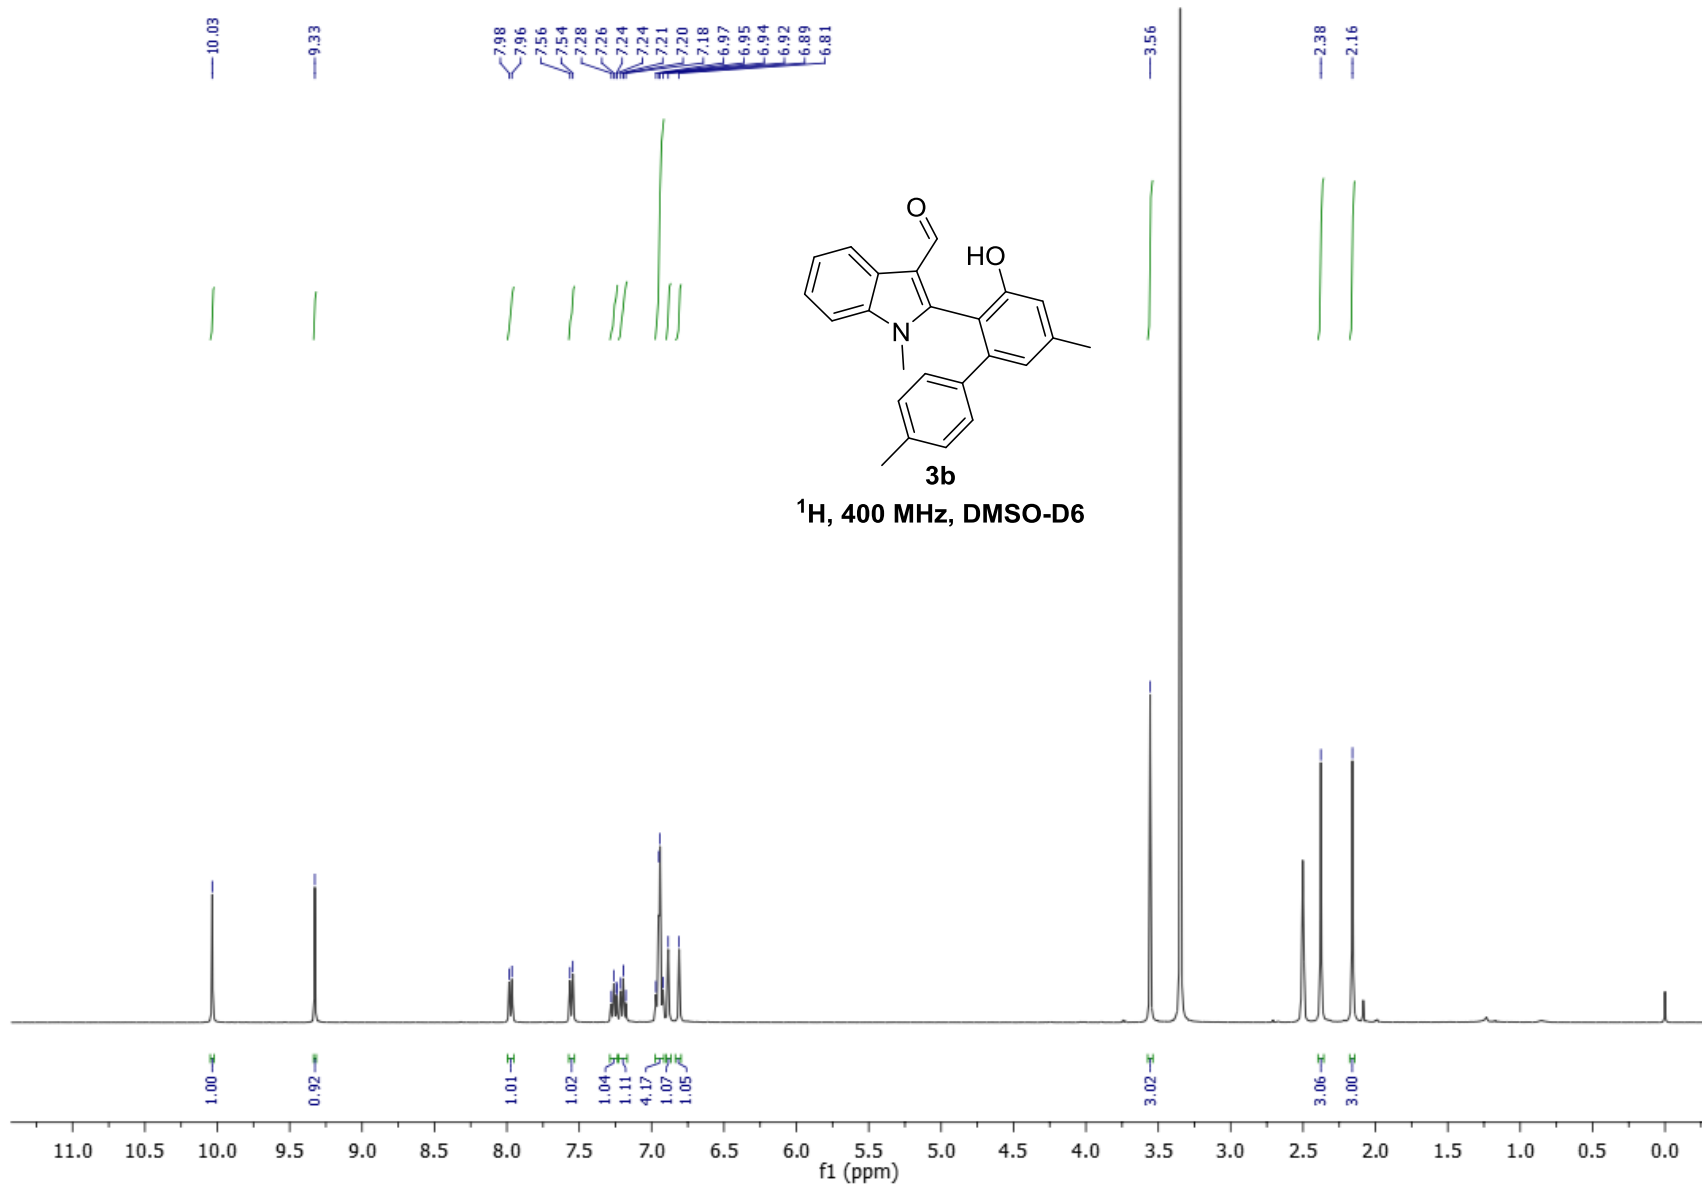



KARNA-M0009

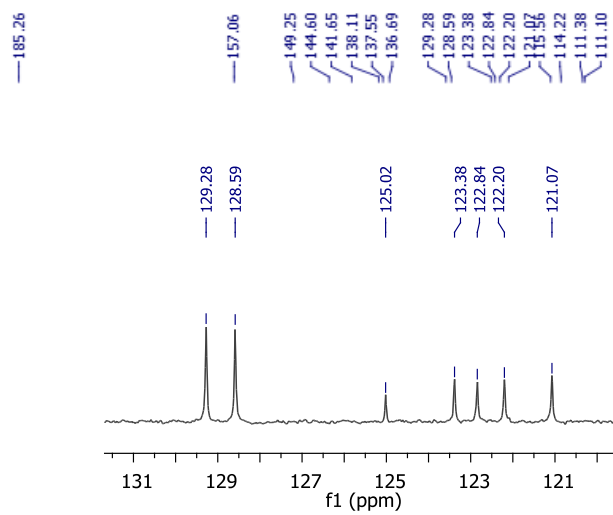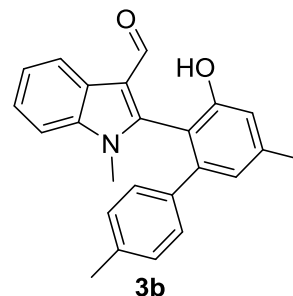

<sup>13</sup>C, 101 MHz, DMSO-D<sub>6</sub>

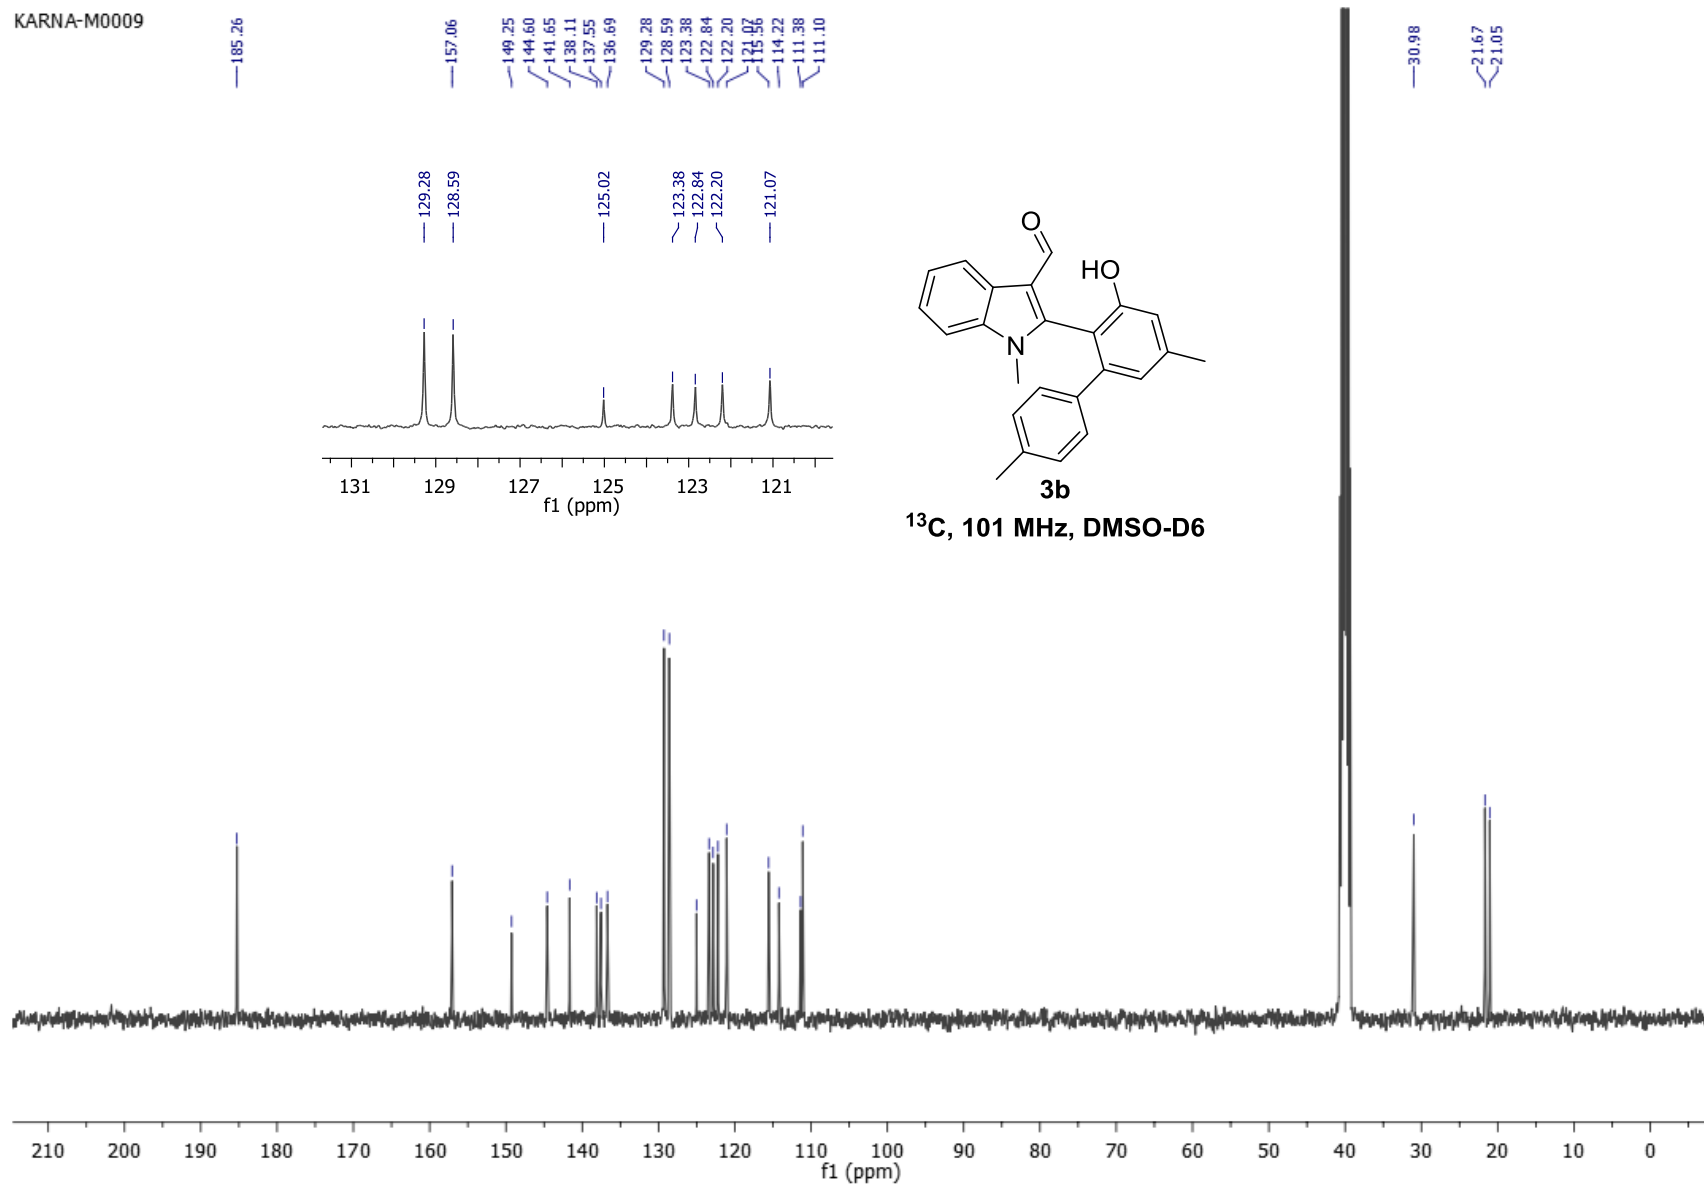

KARNA-M0009

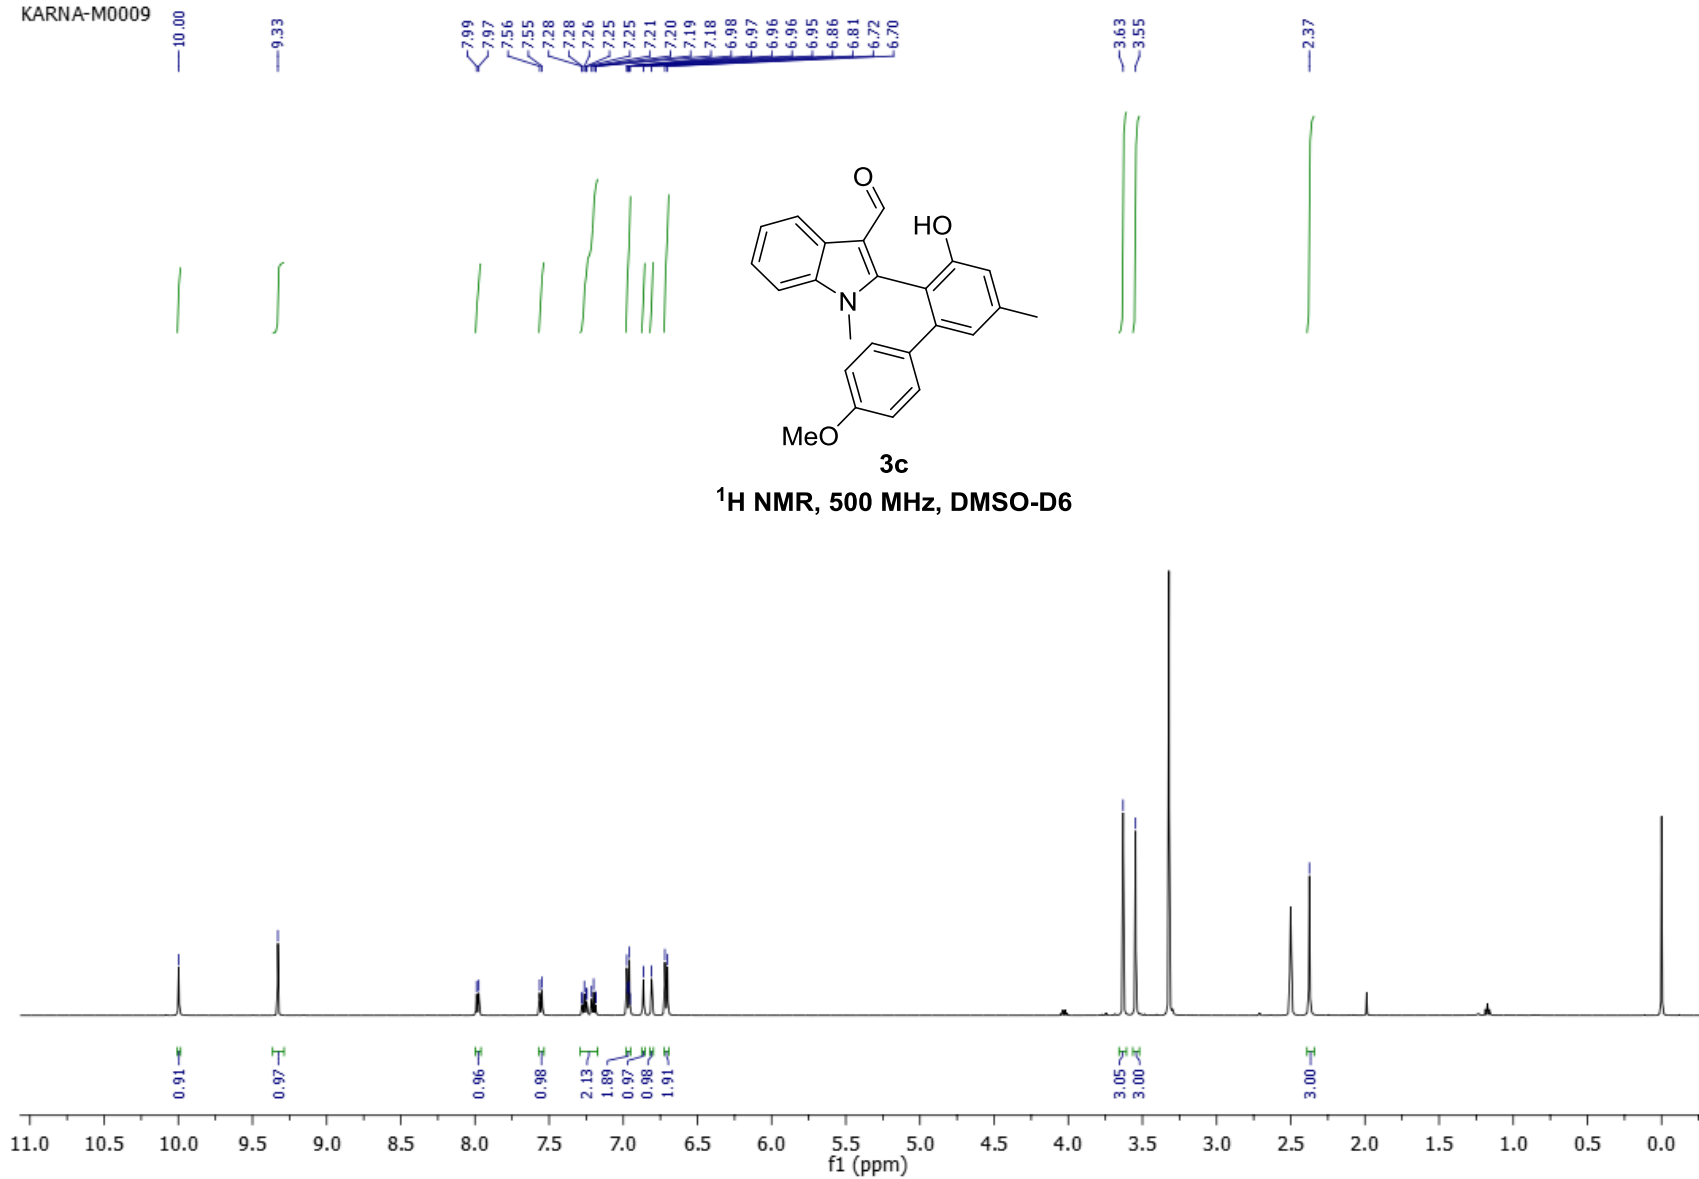

KARNA M00090

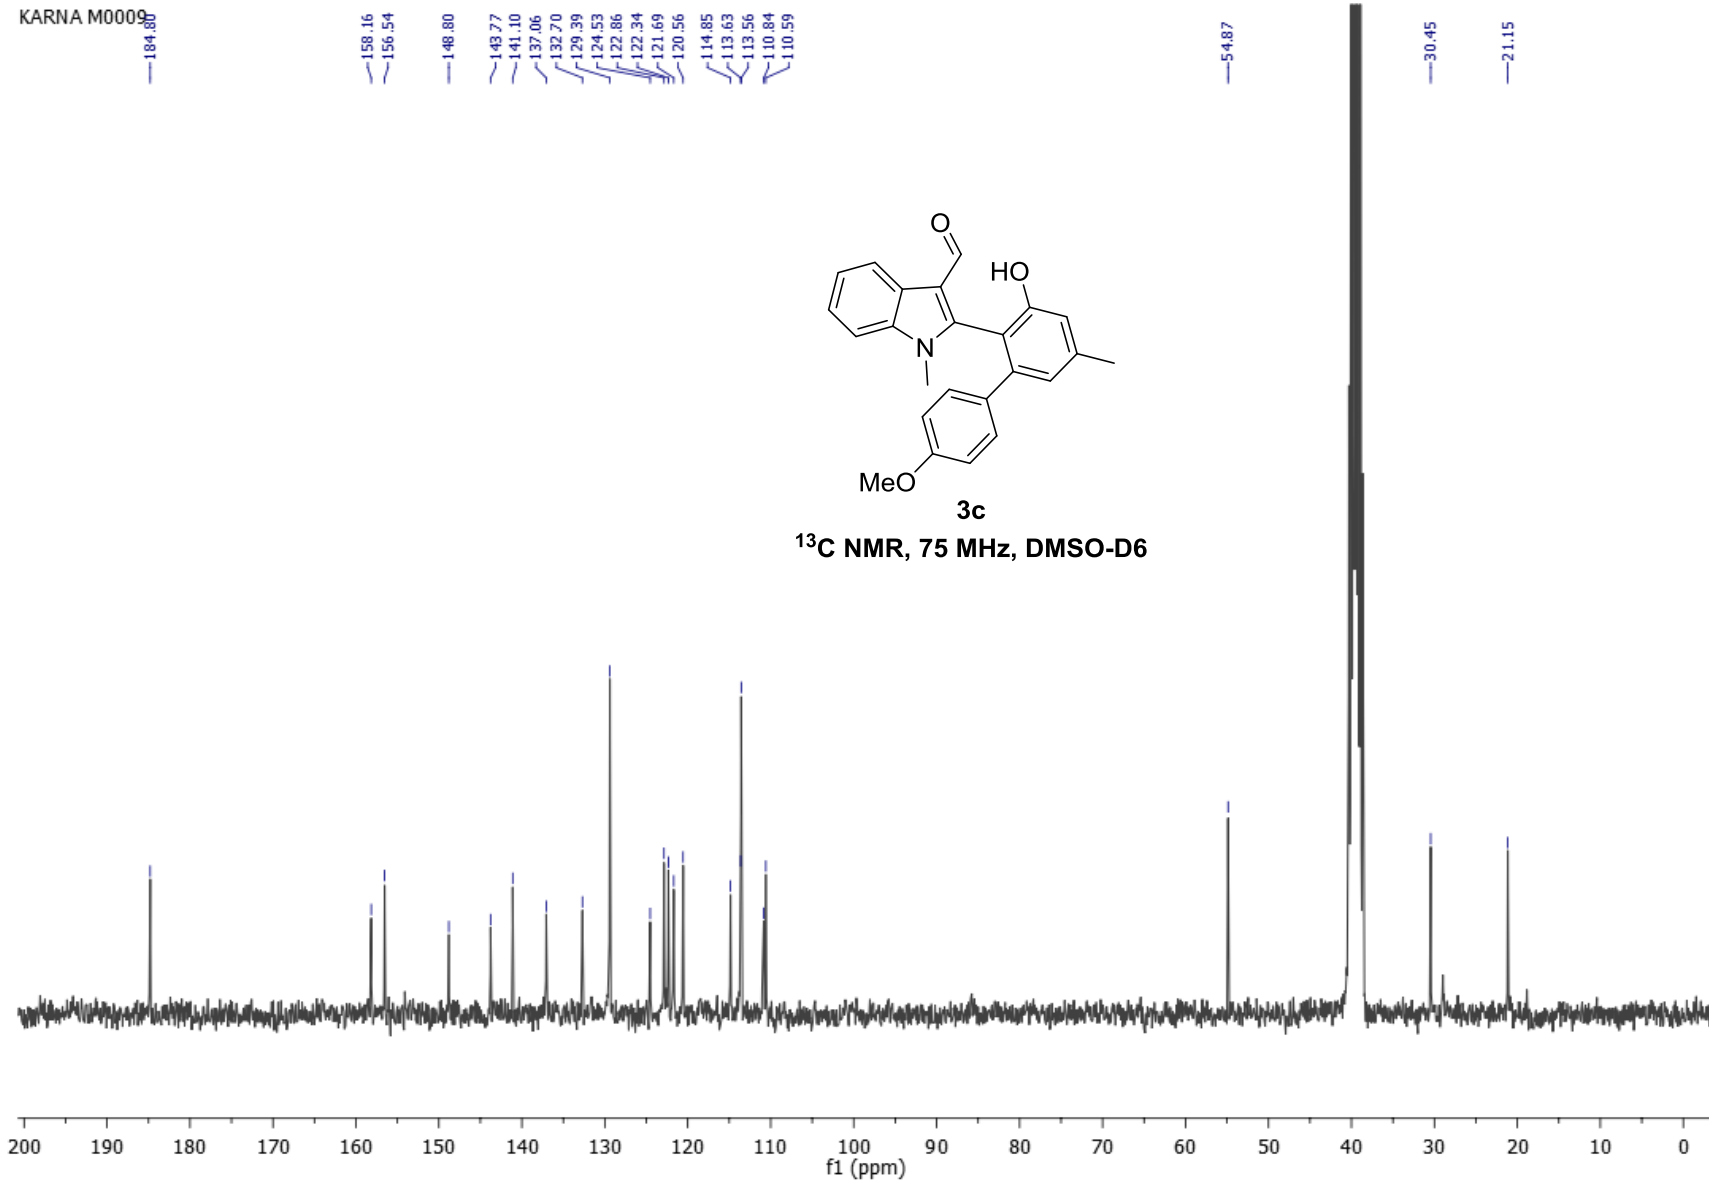

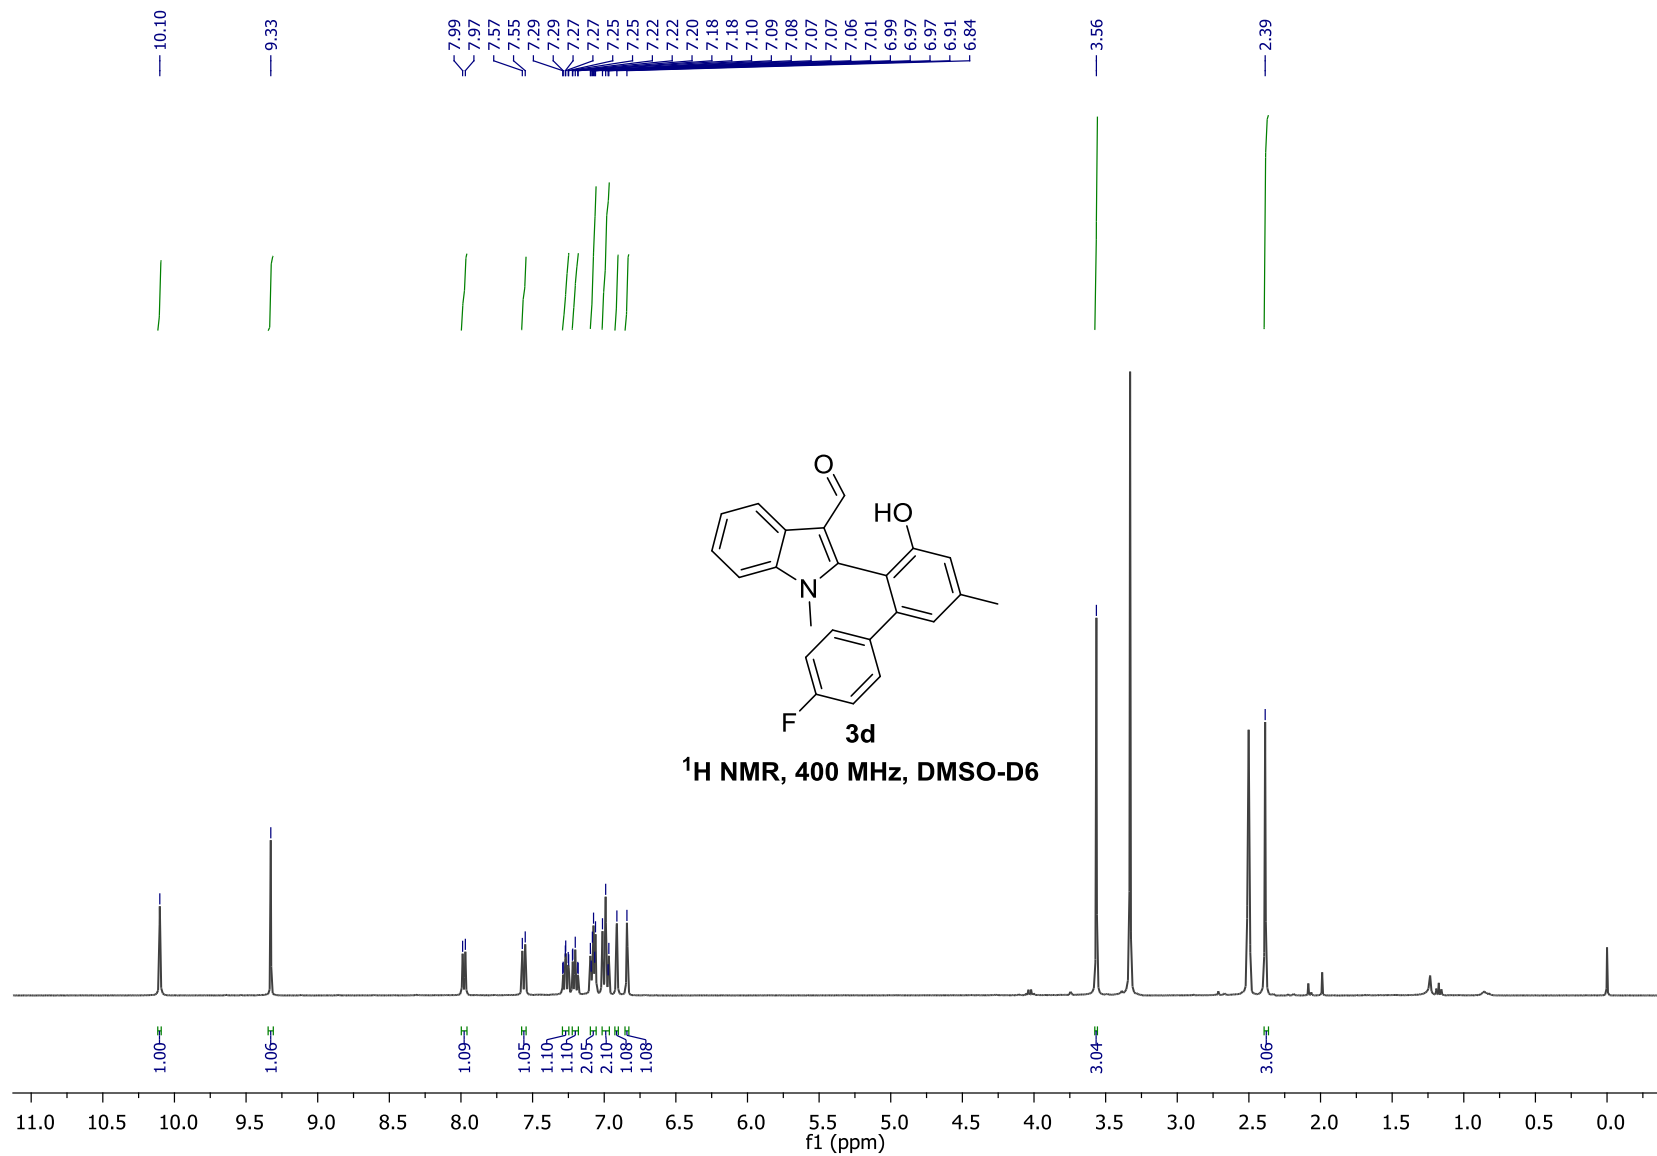

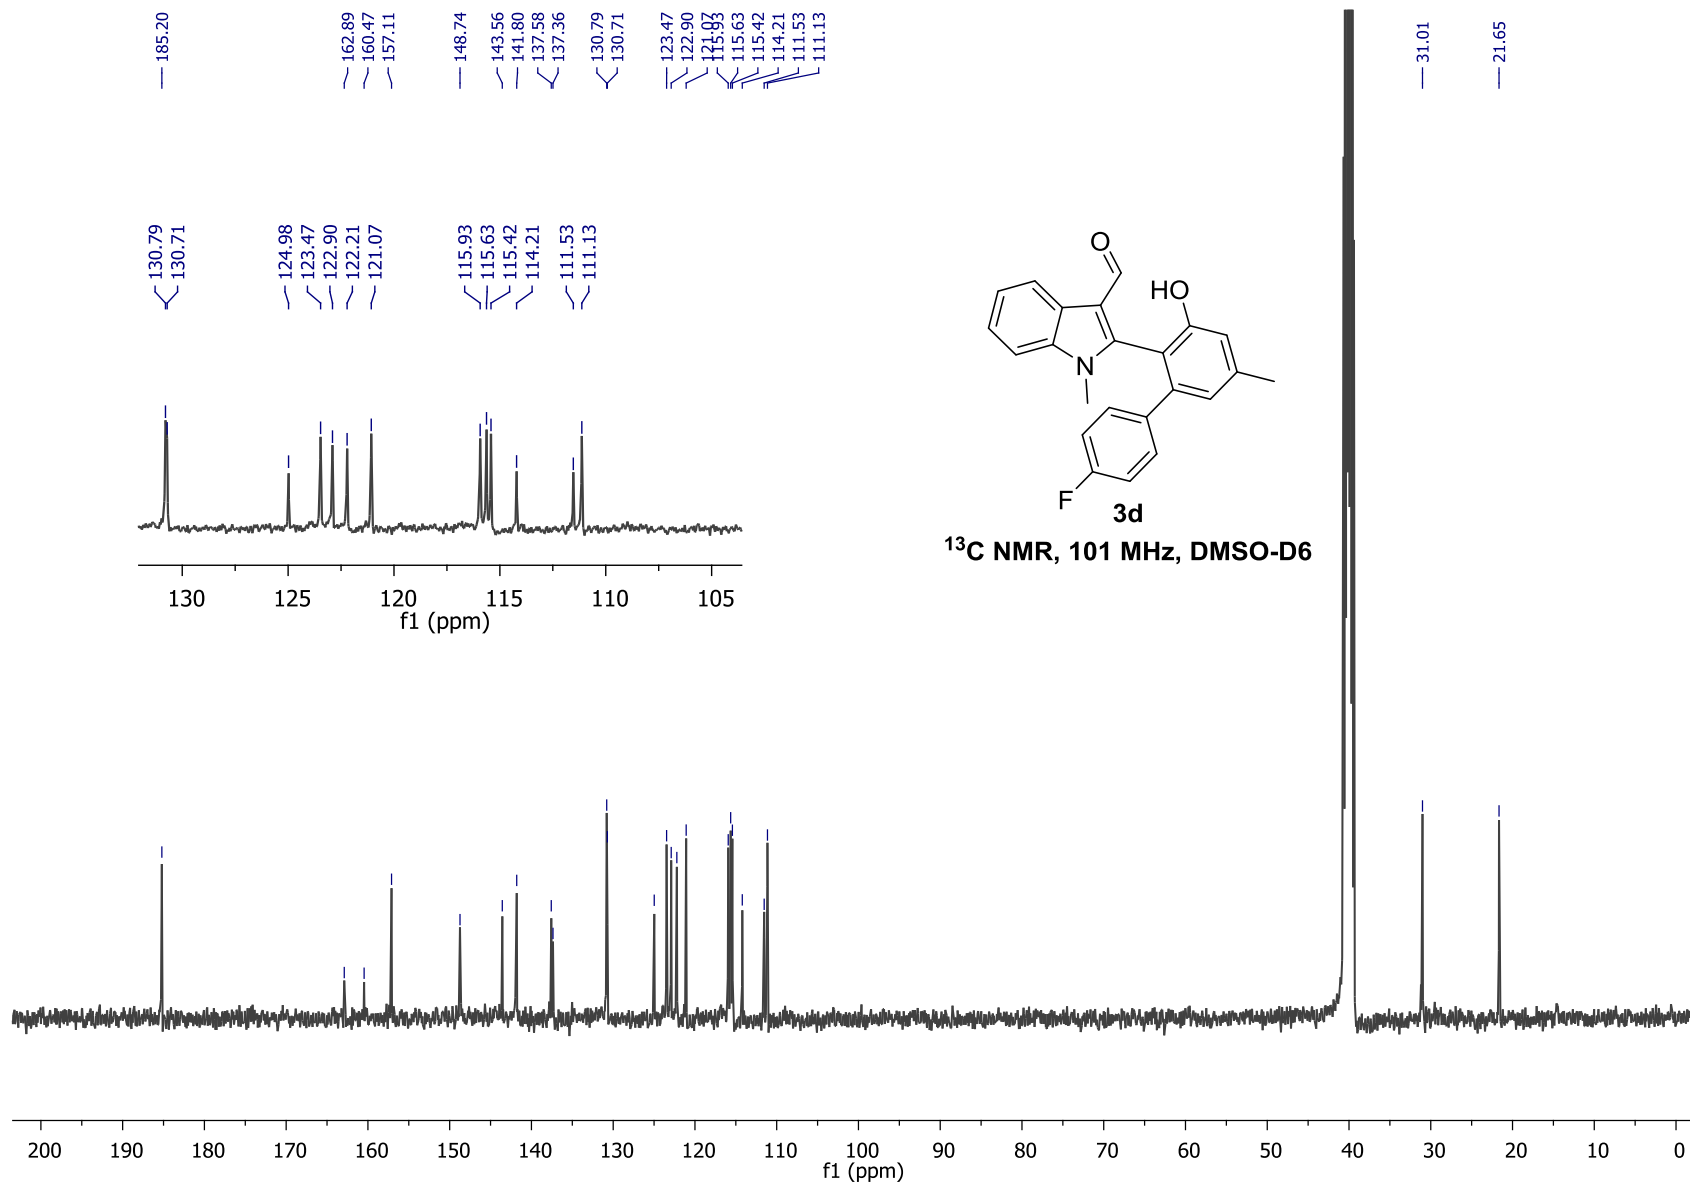

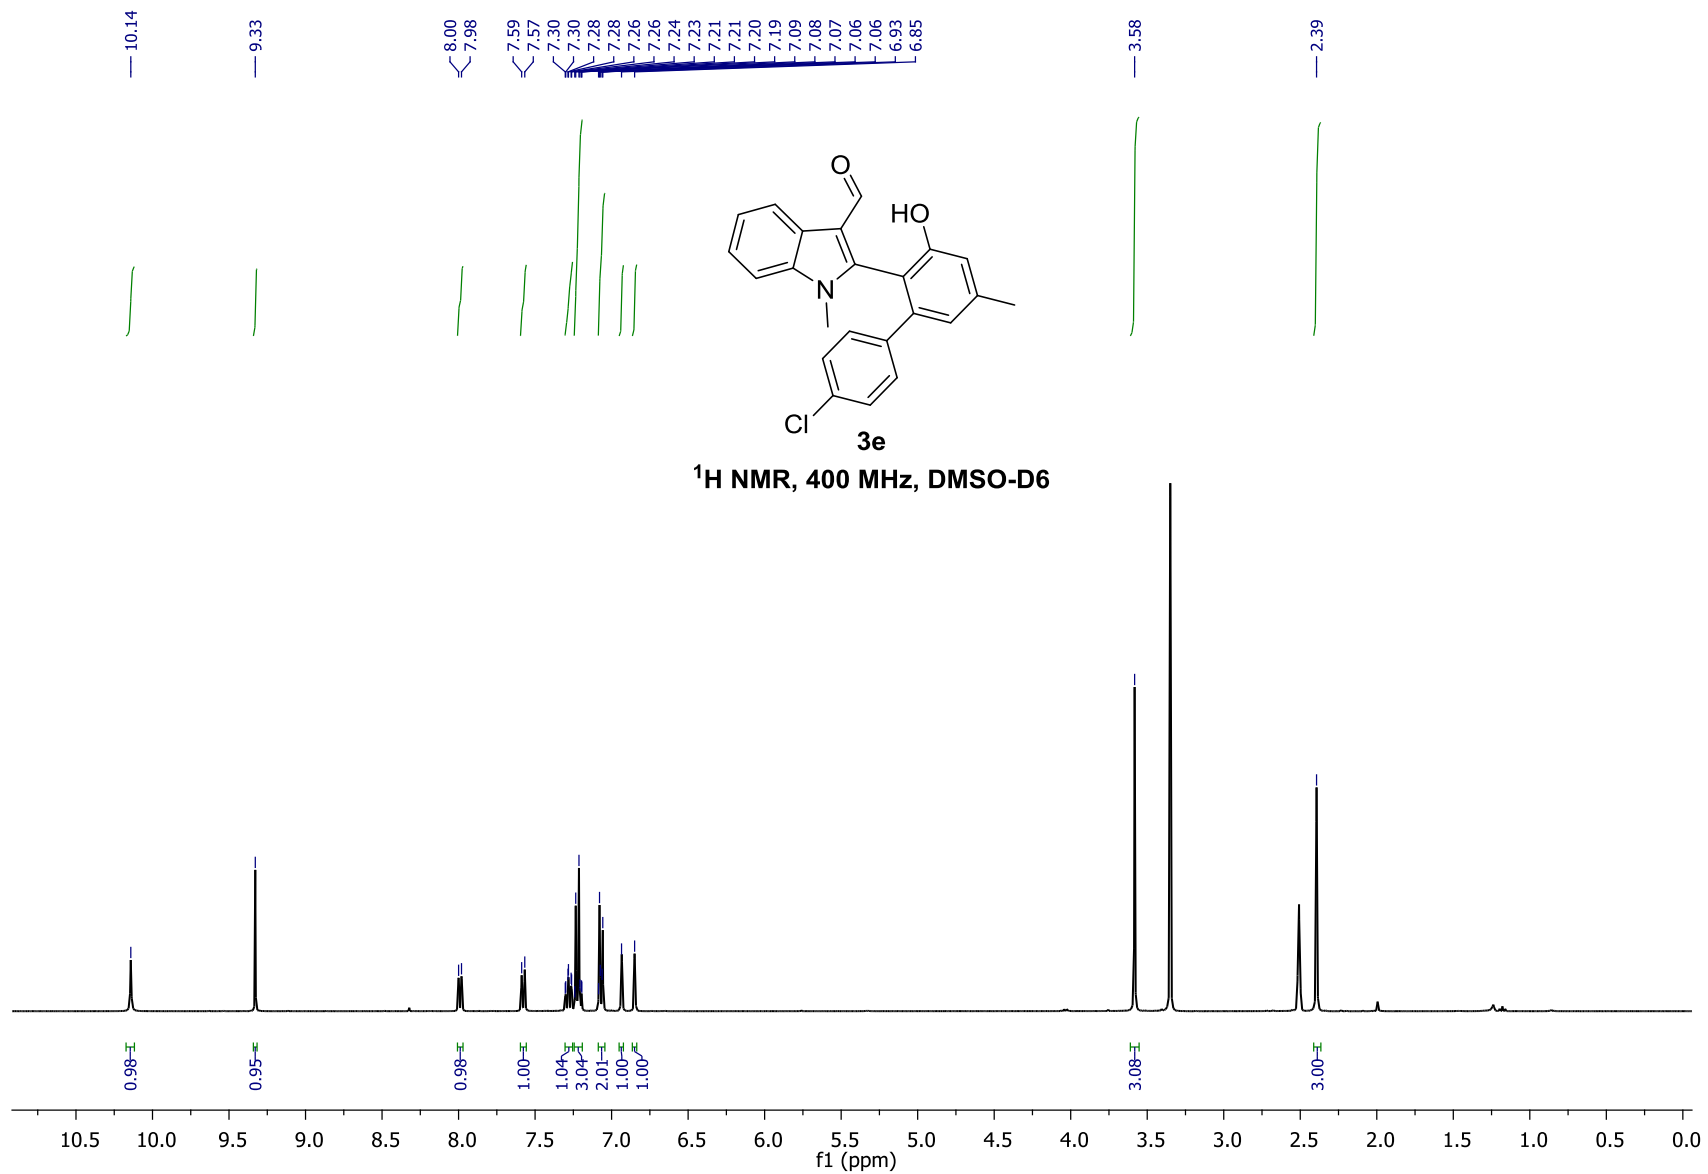



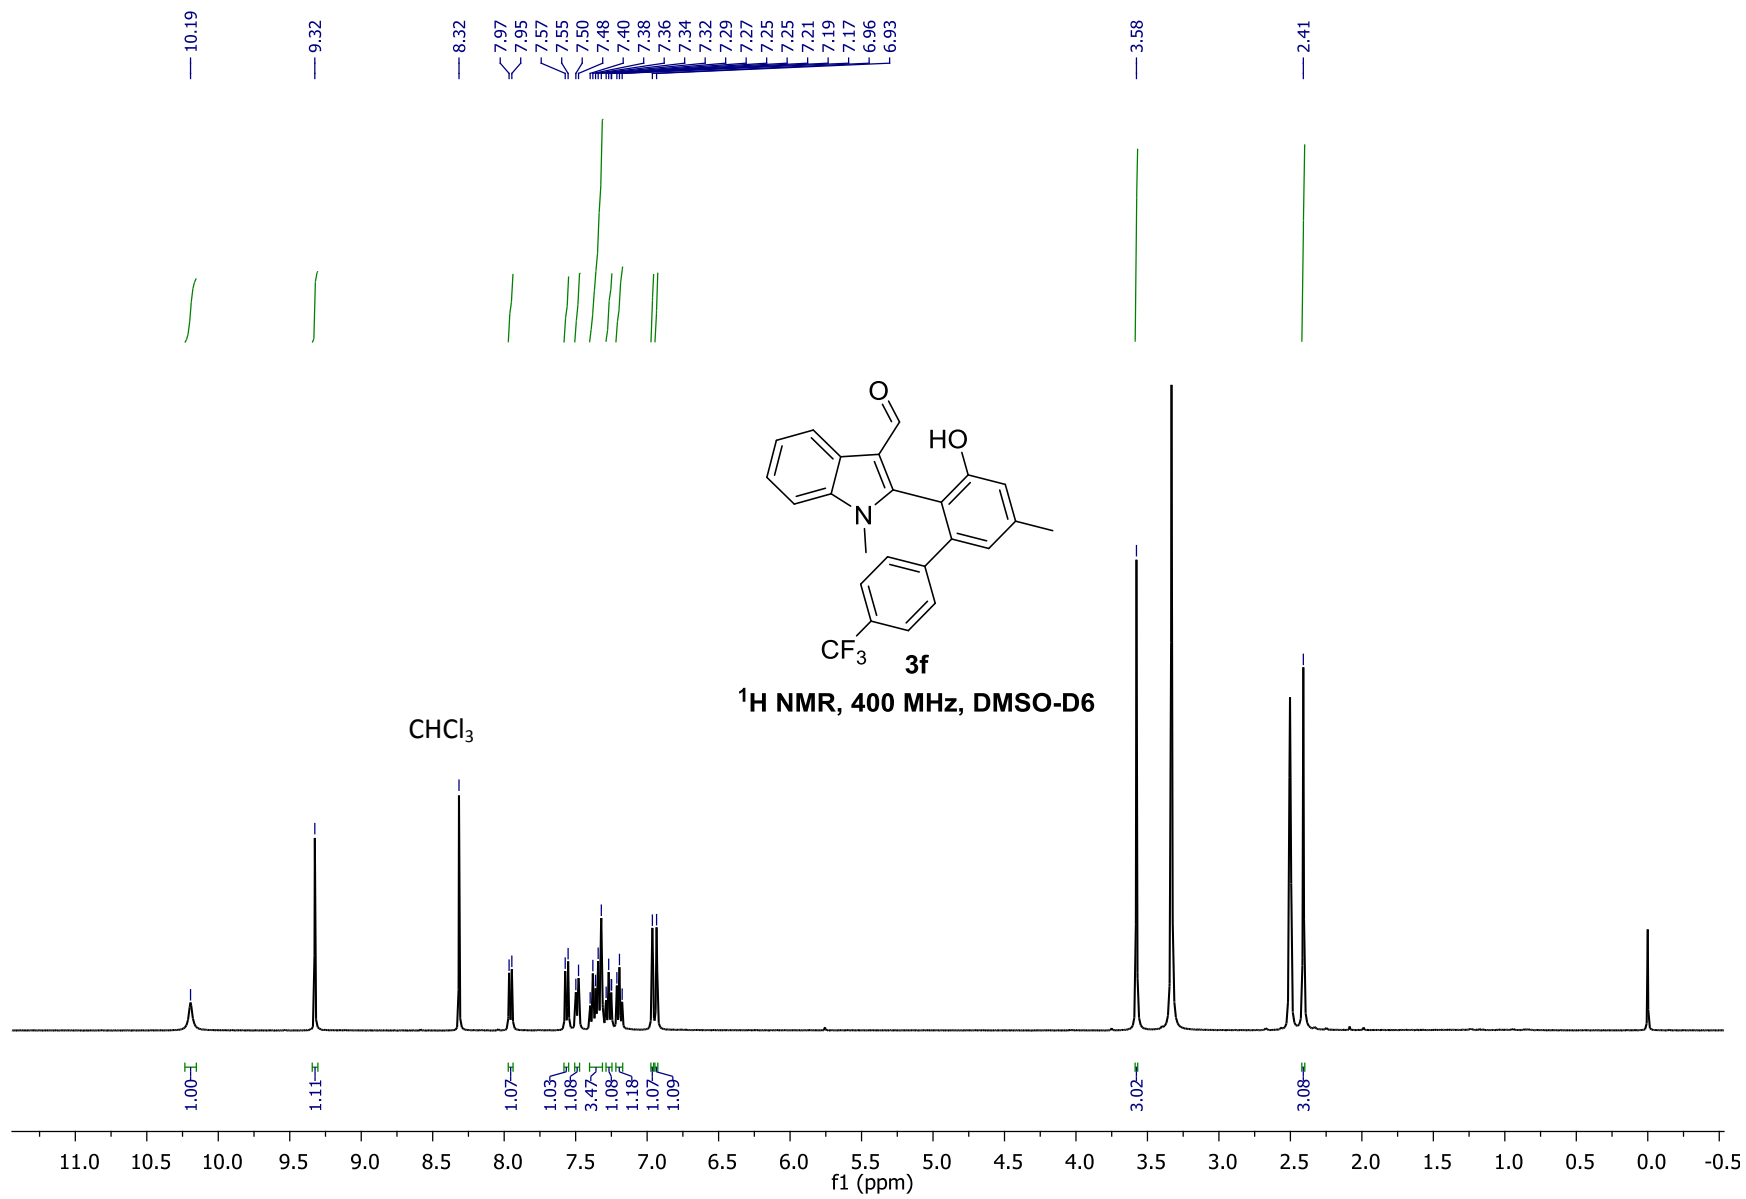



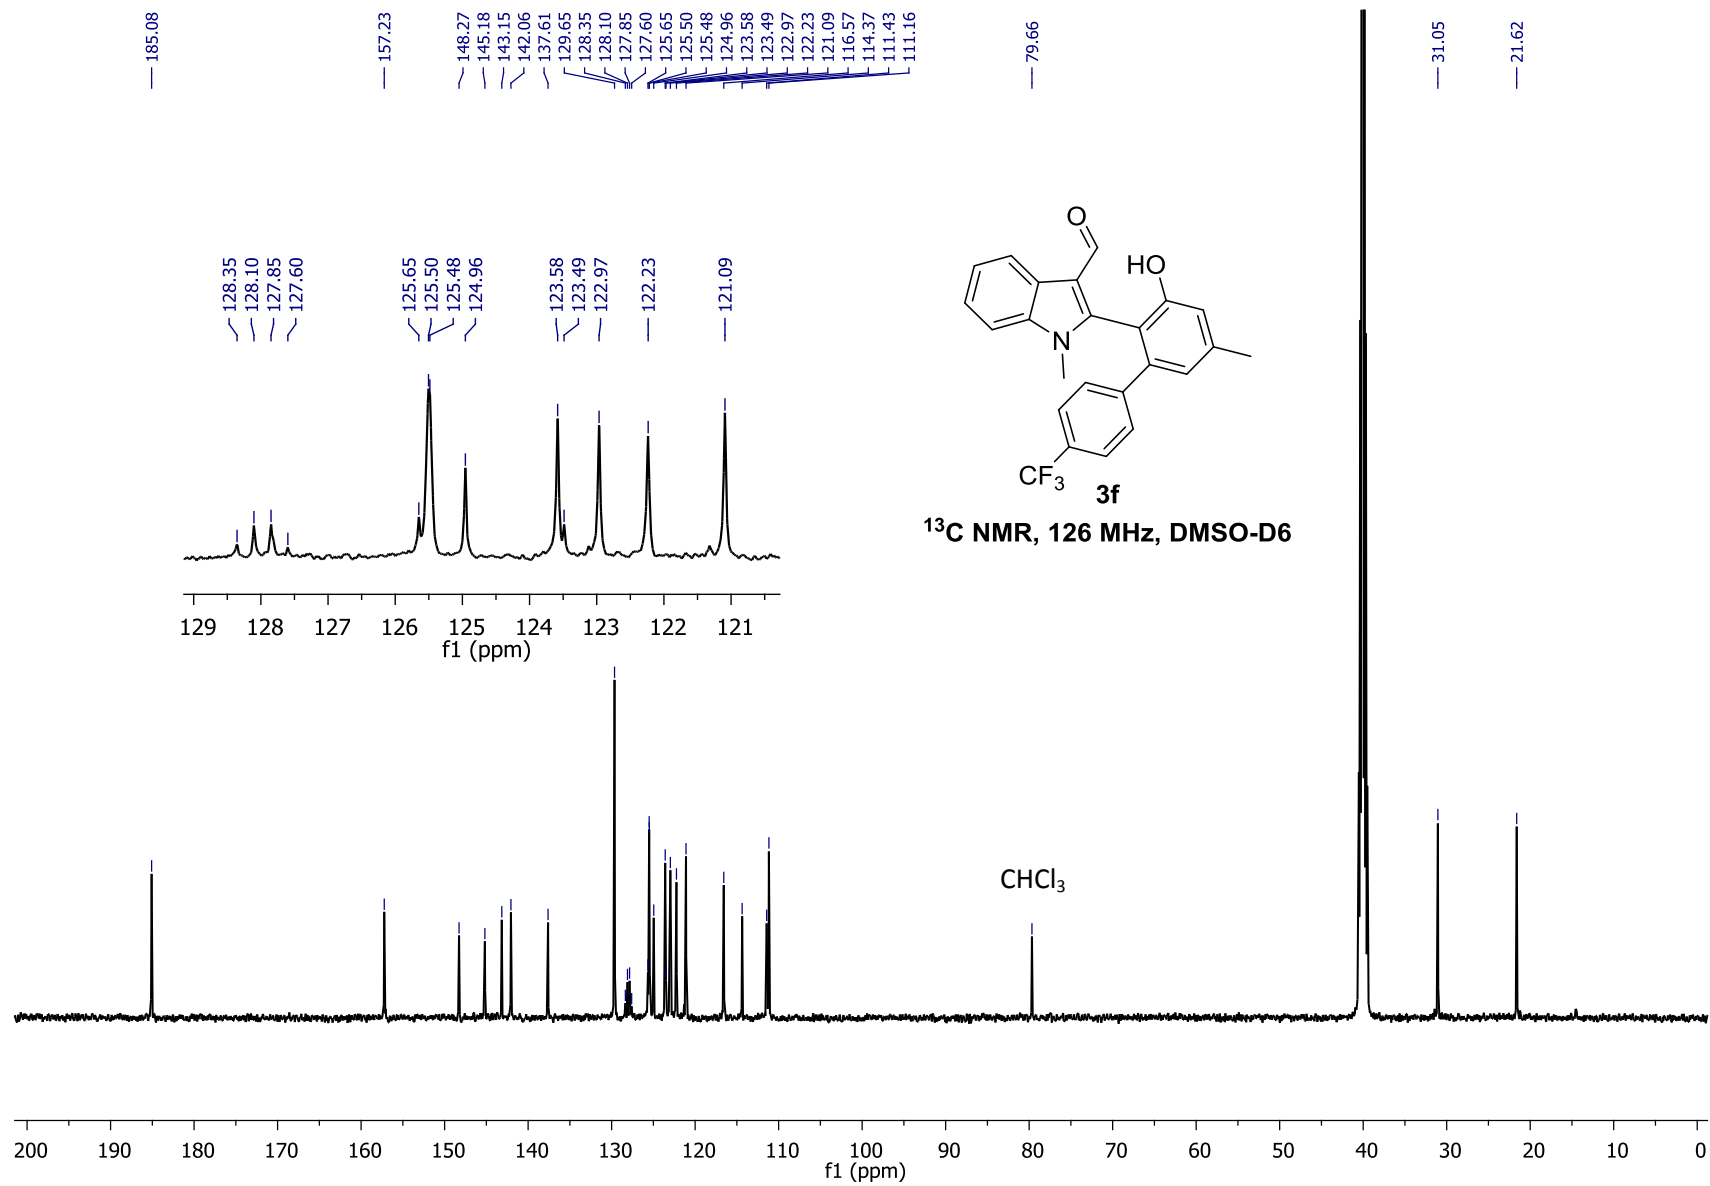

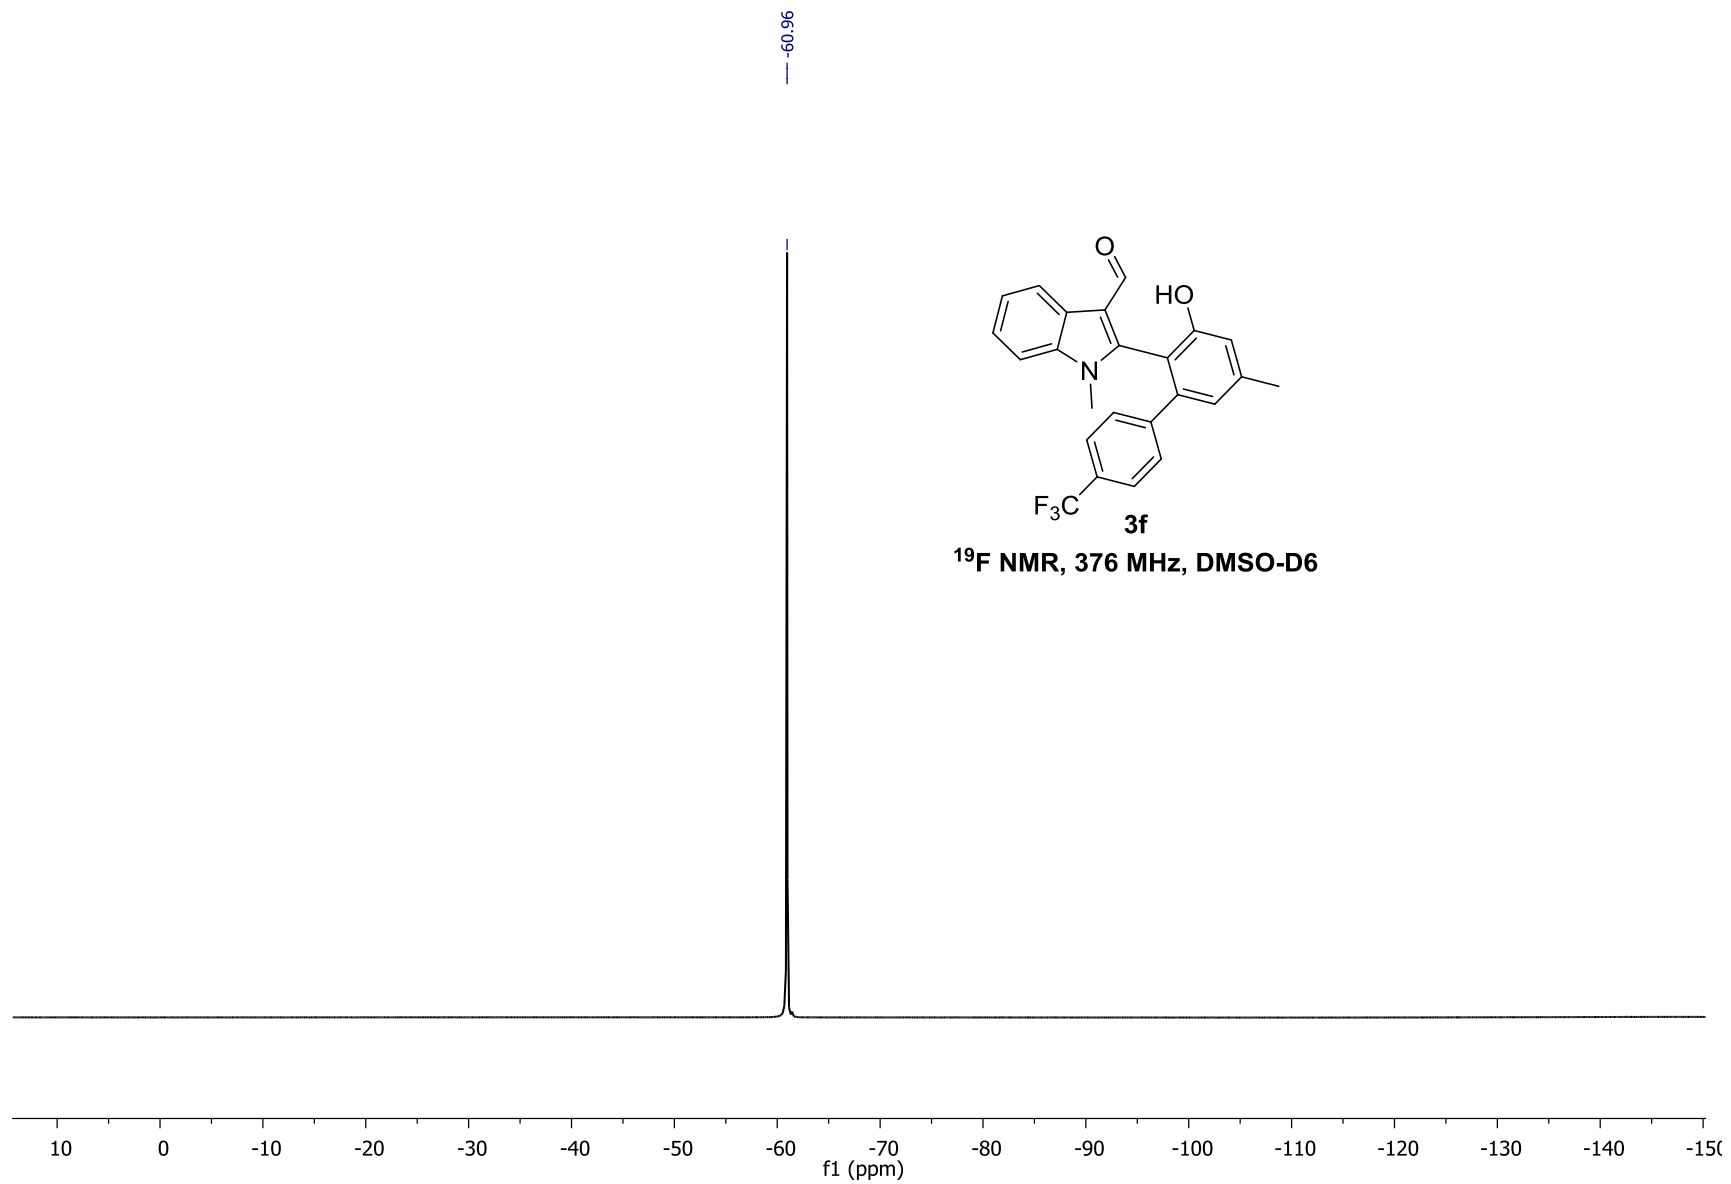

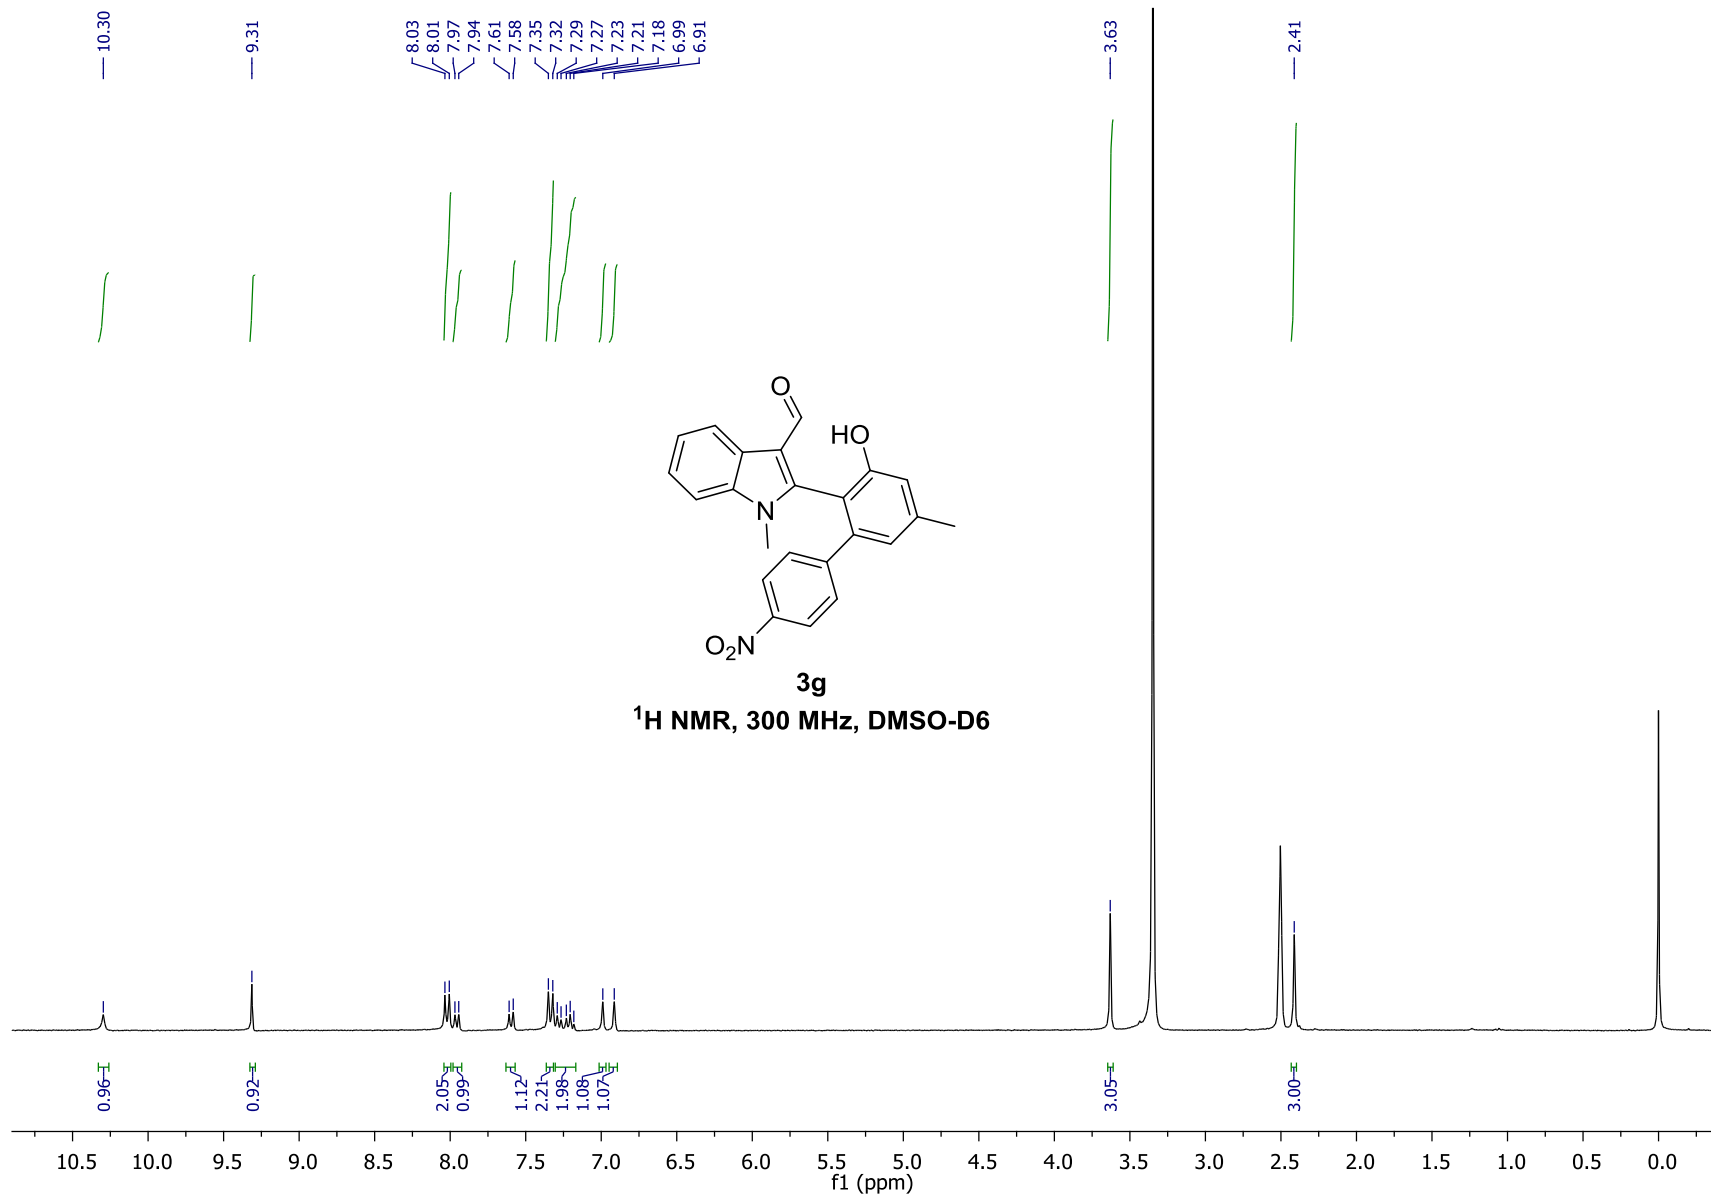

KARNA-M0009

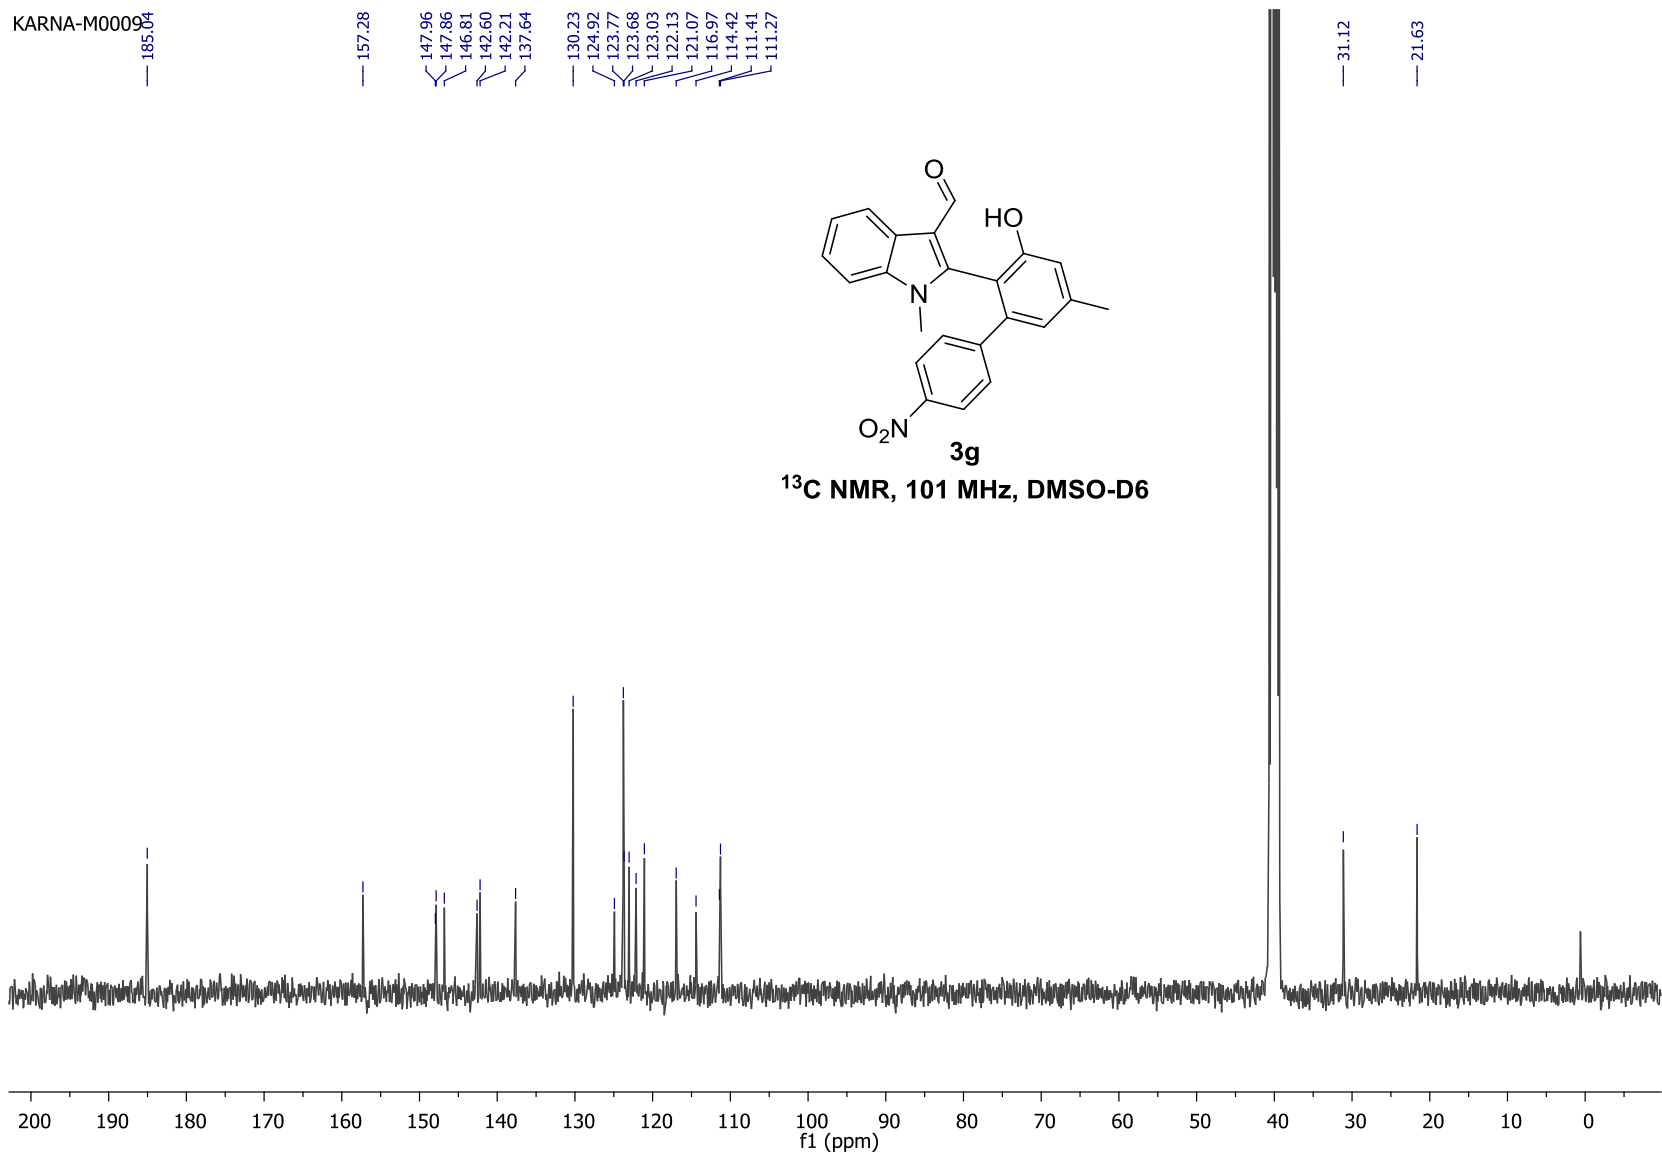

KARNA-M0008

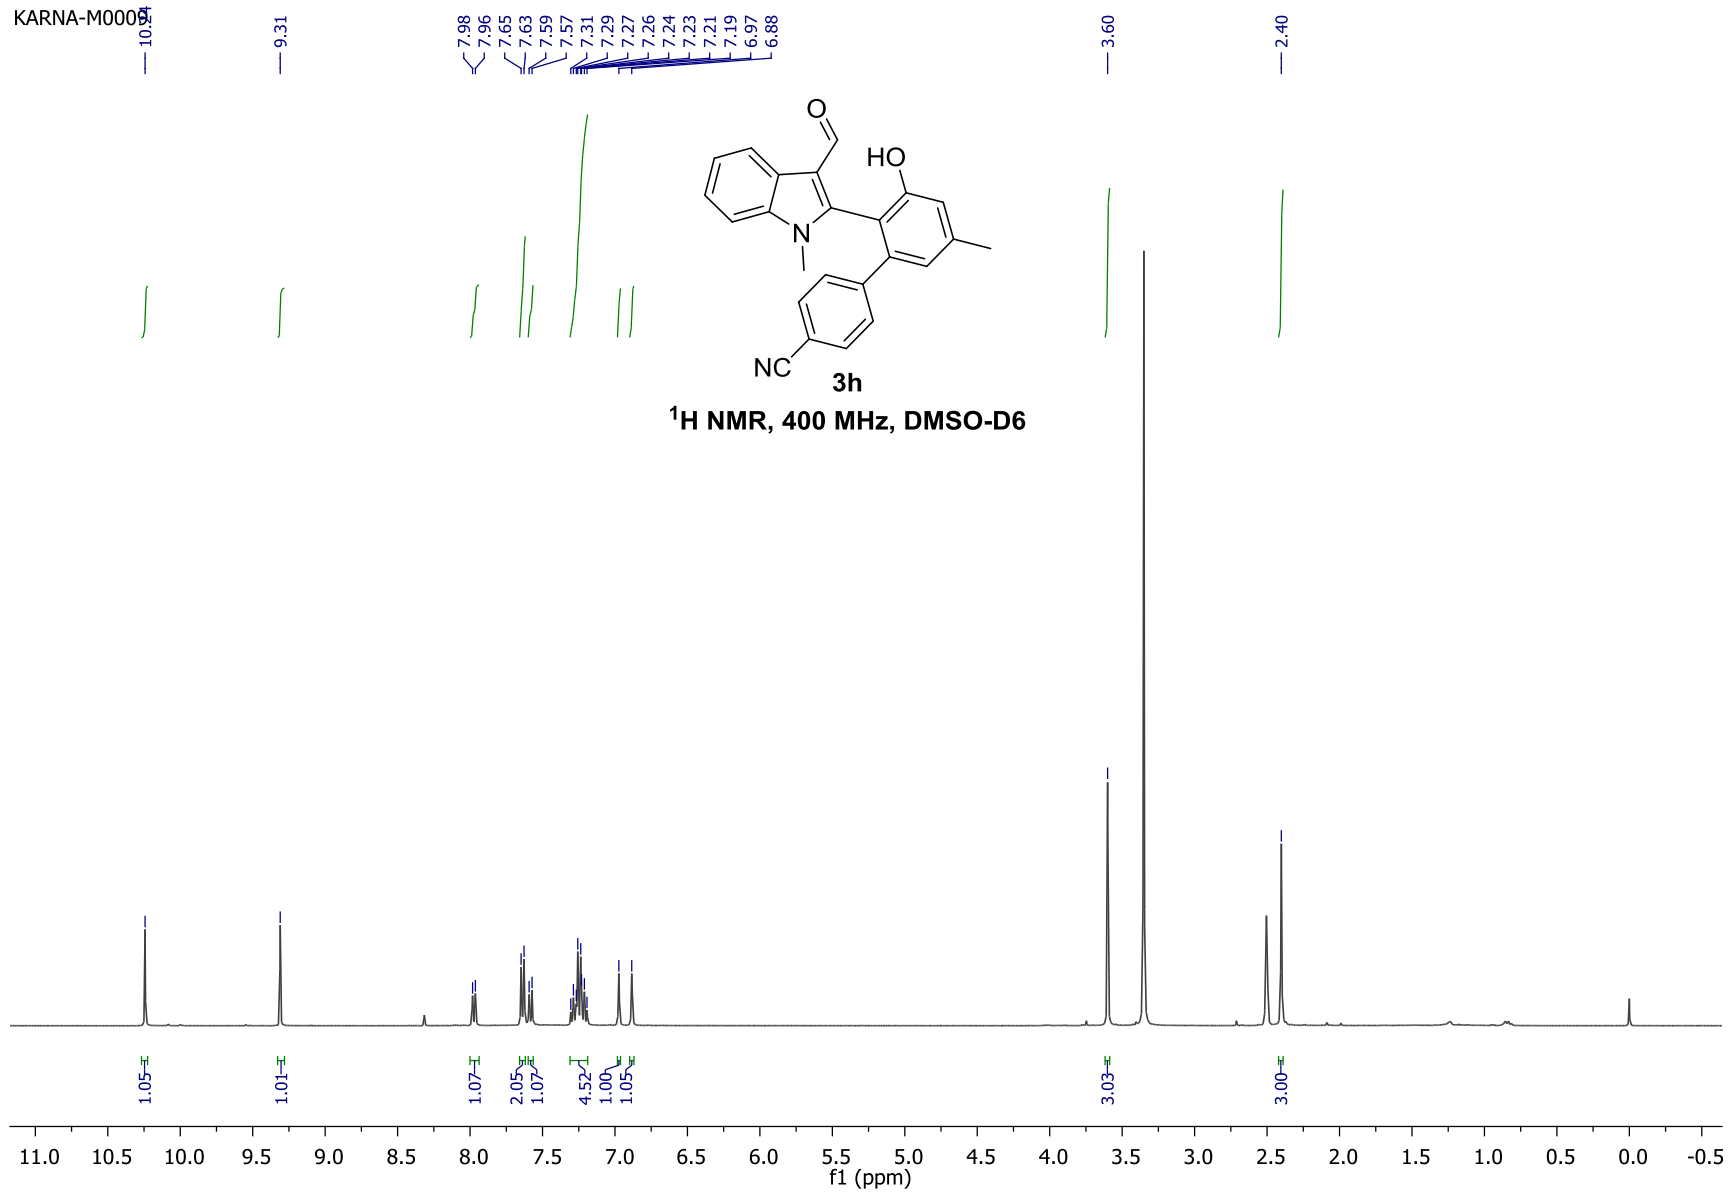

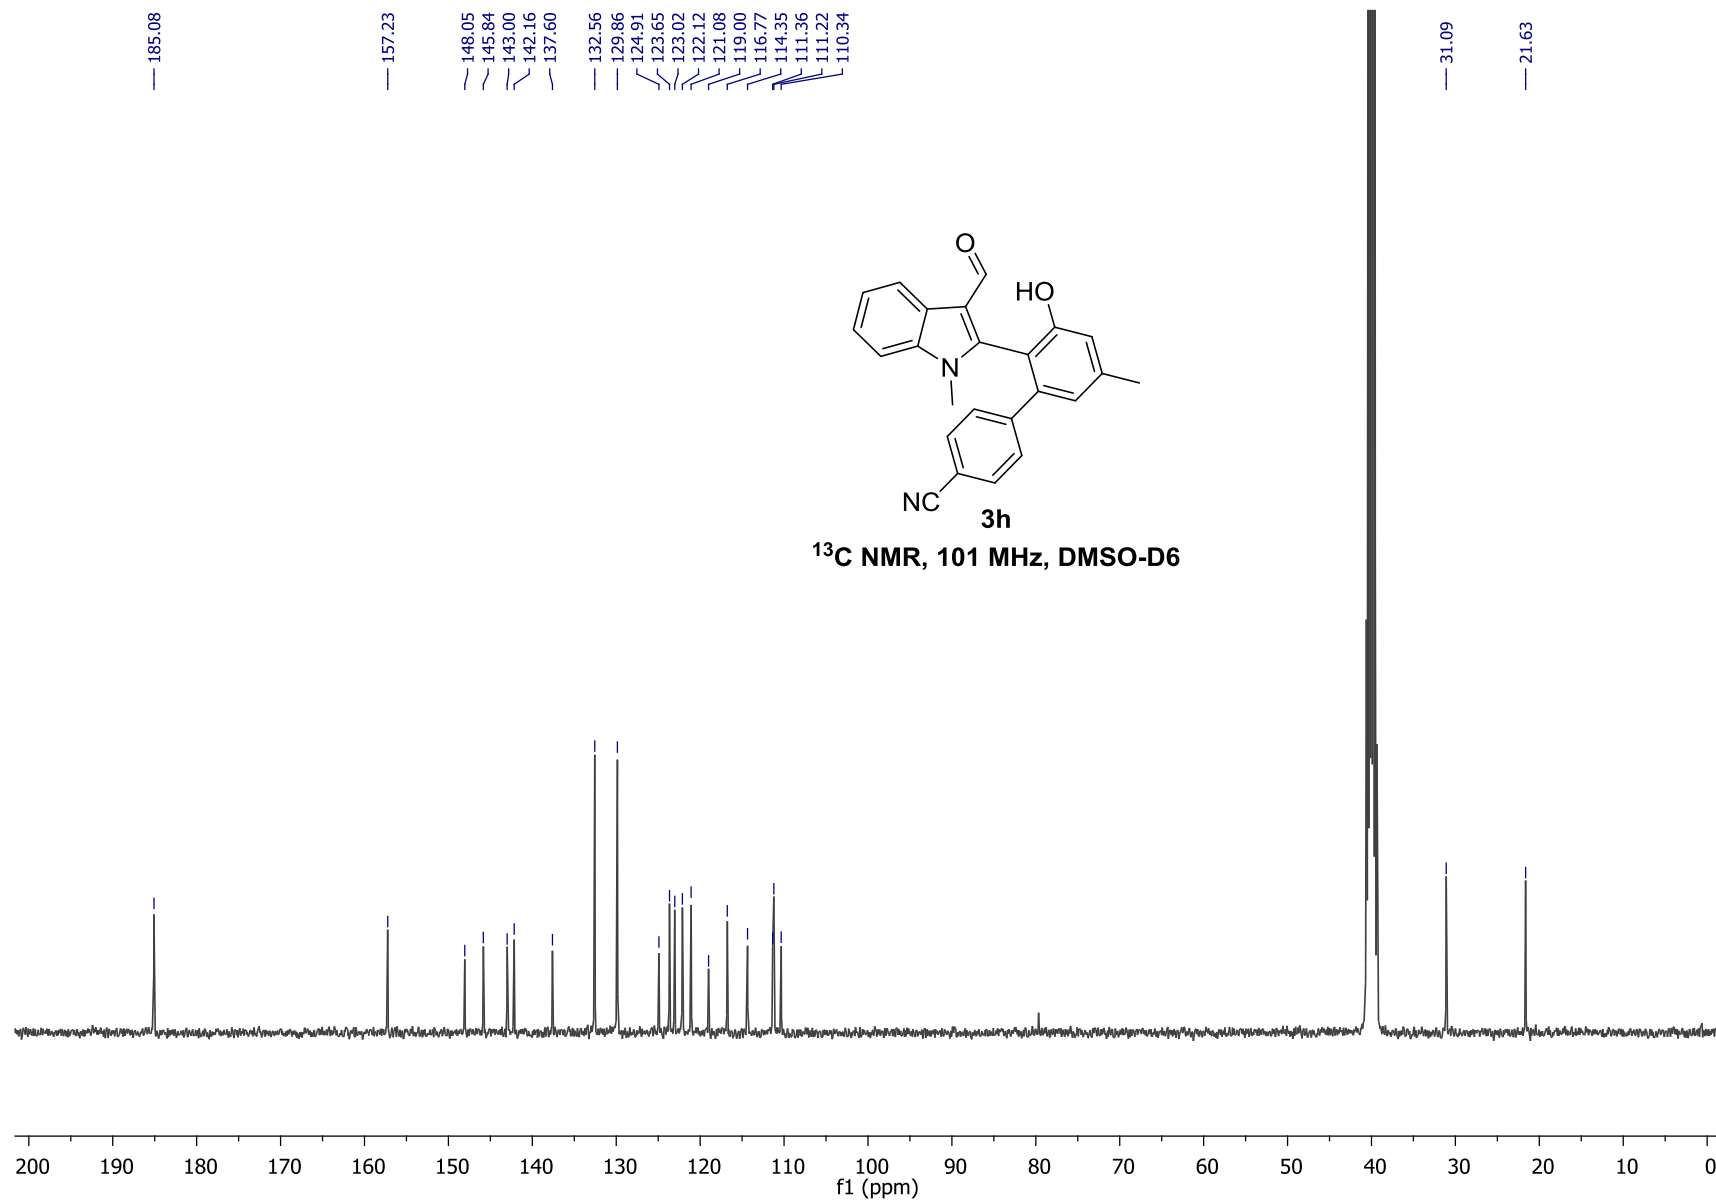

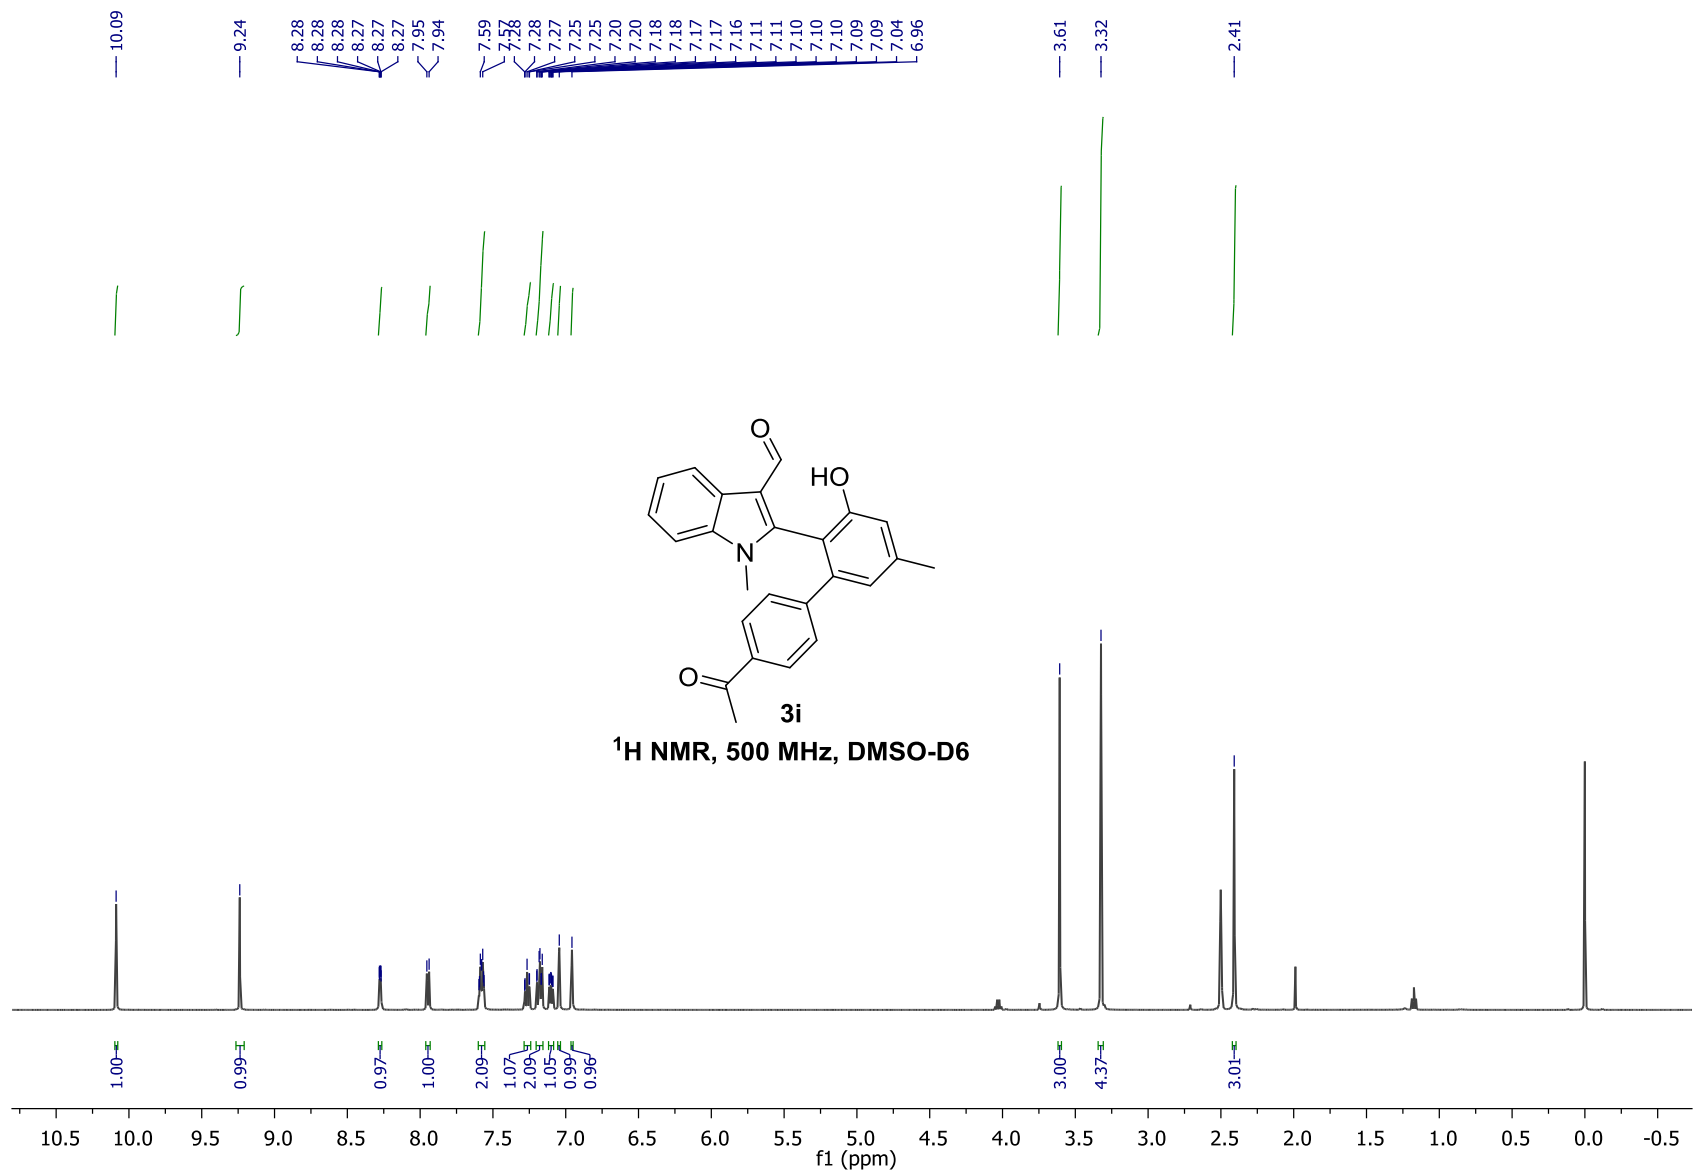

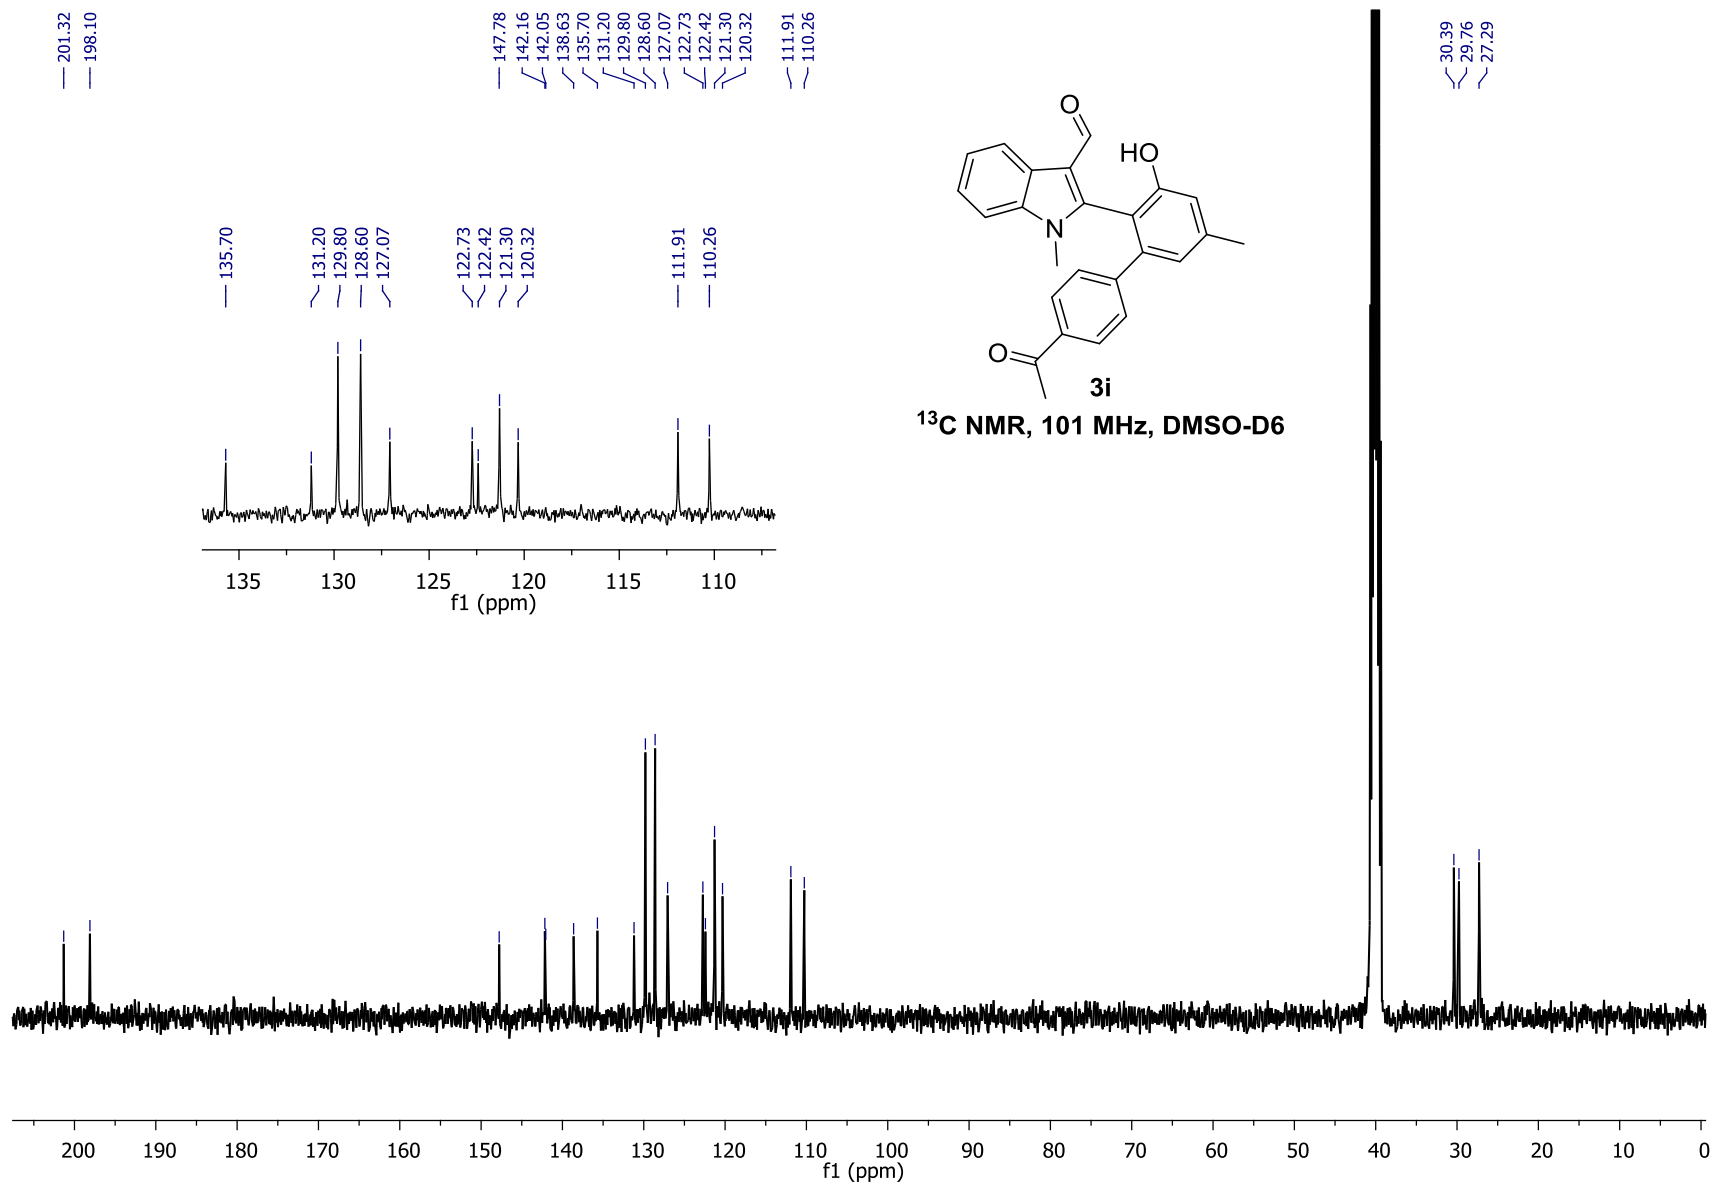



KARNA-M0009

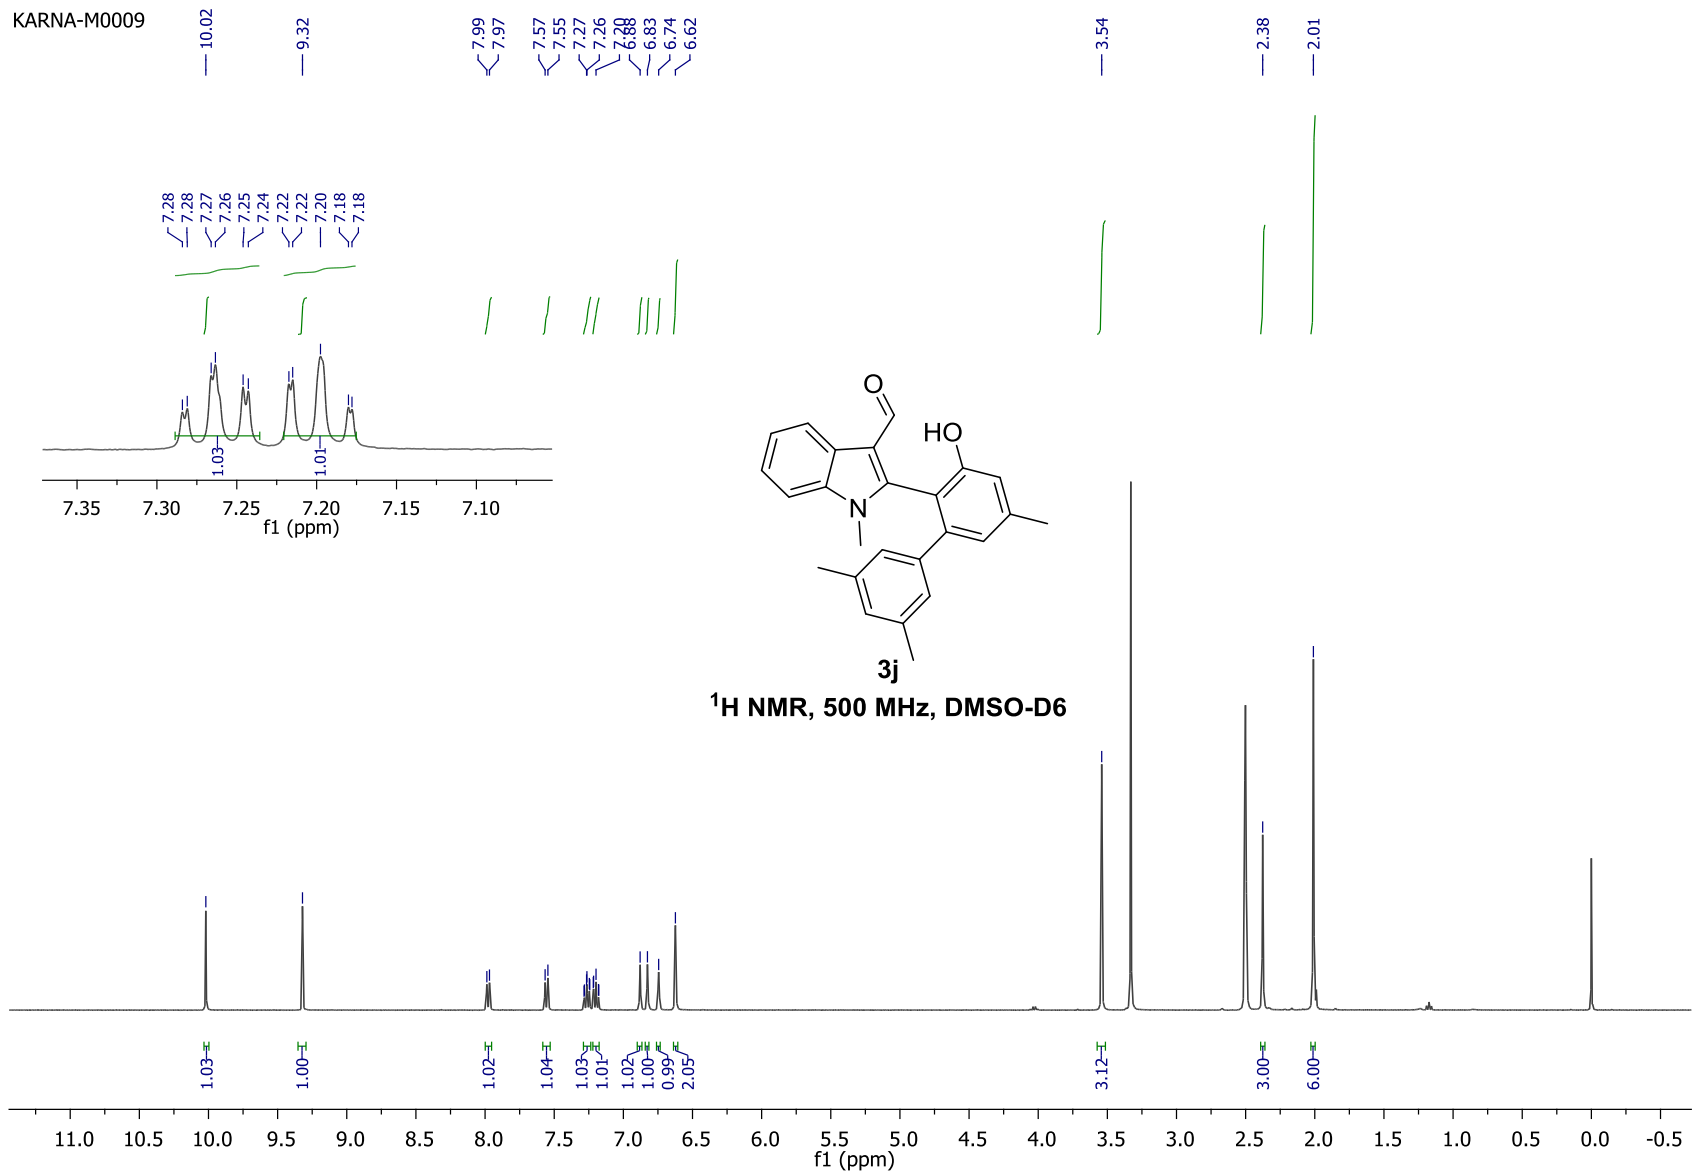

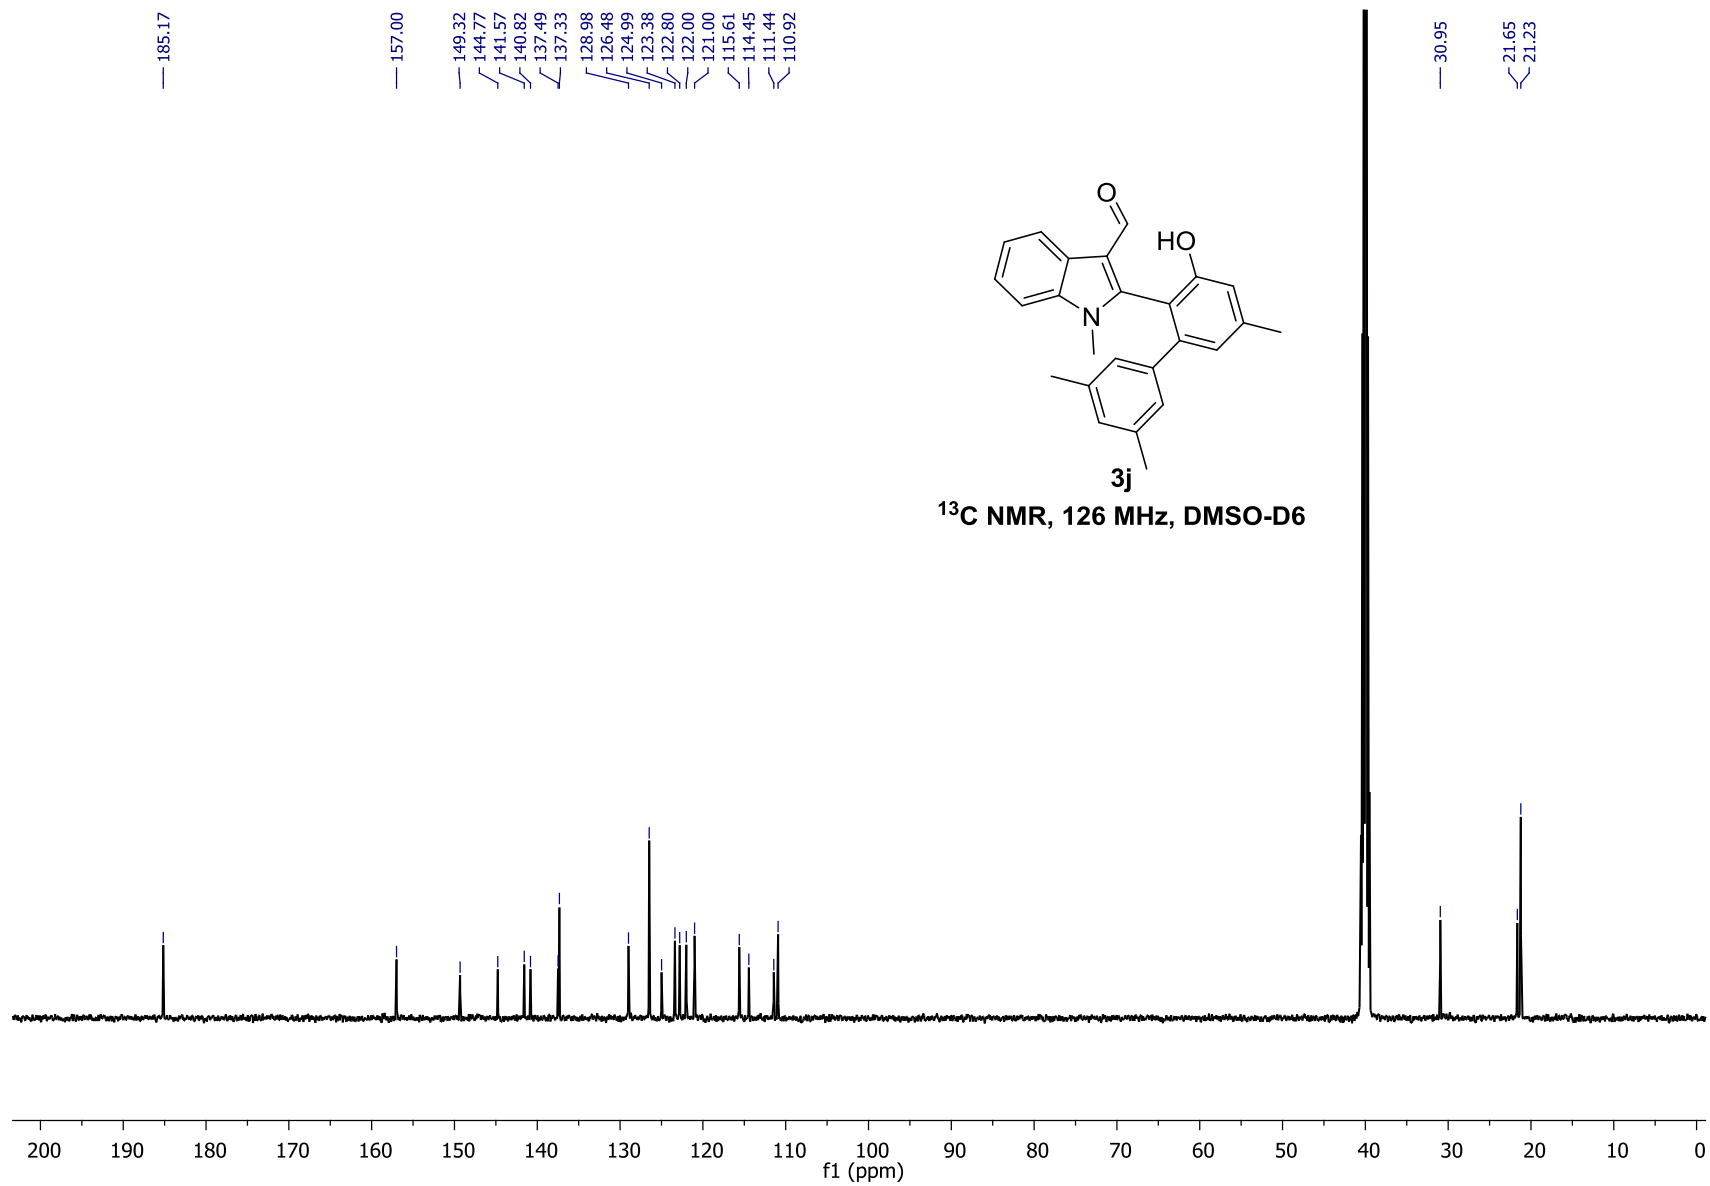

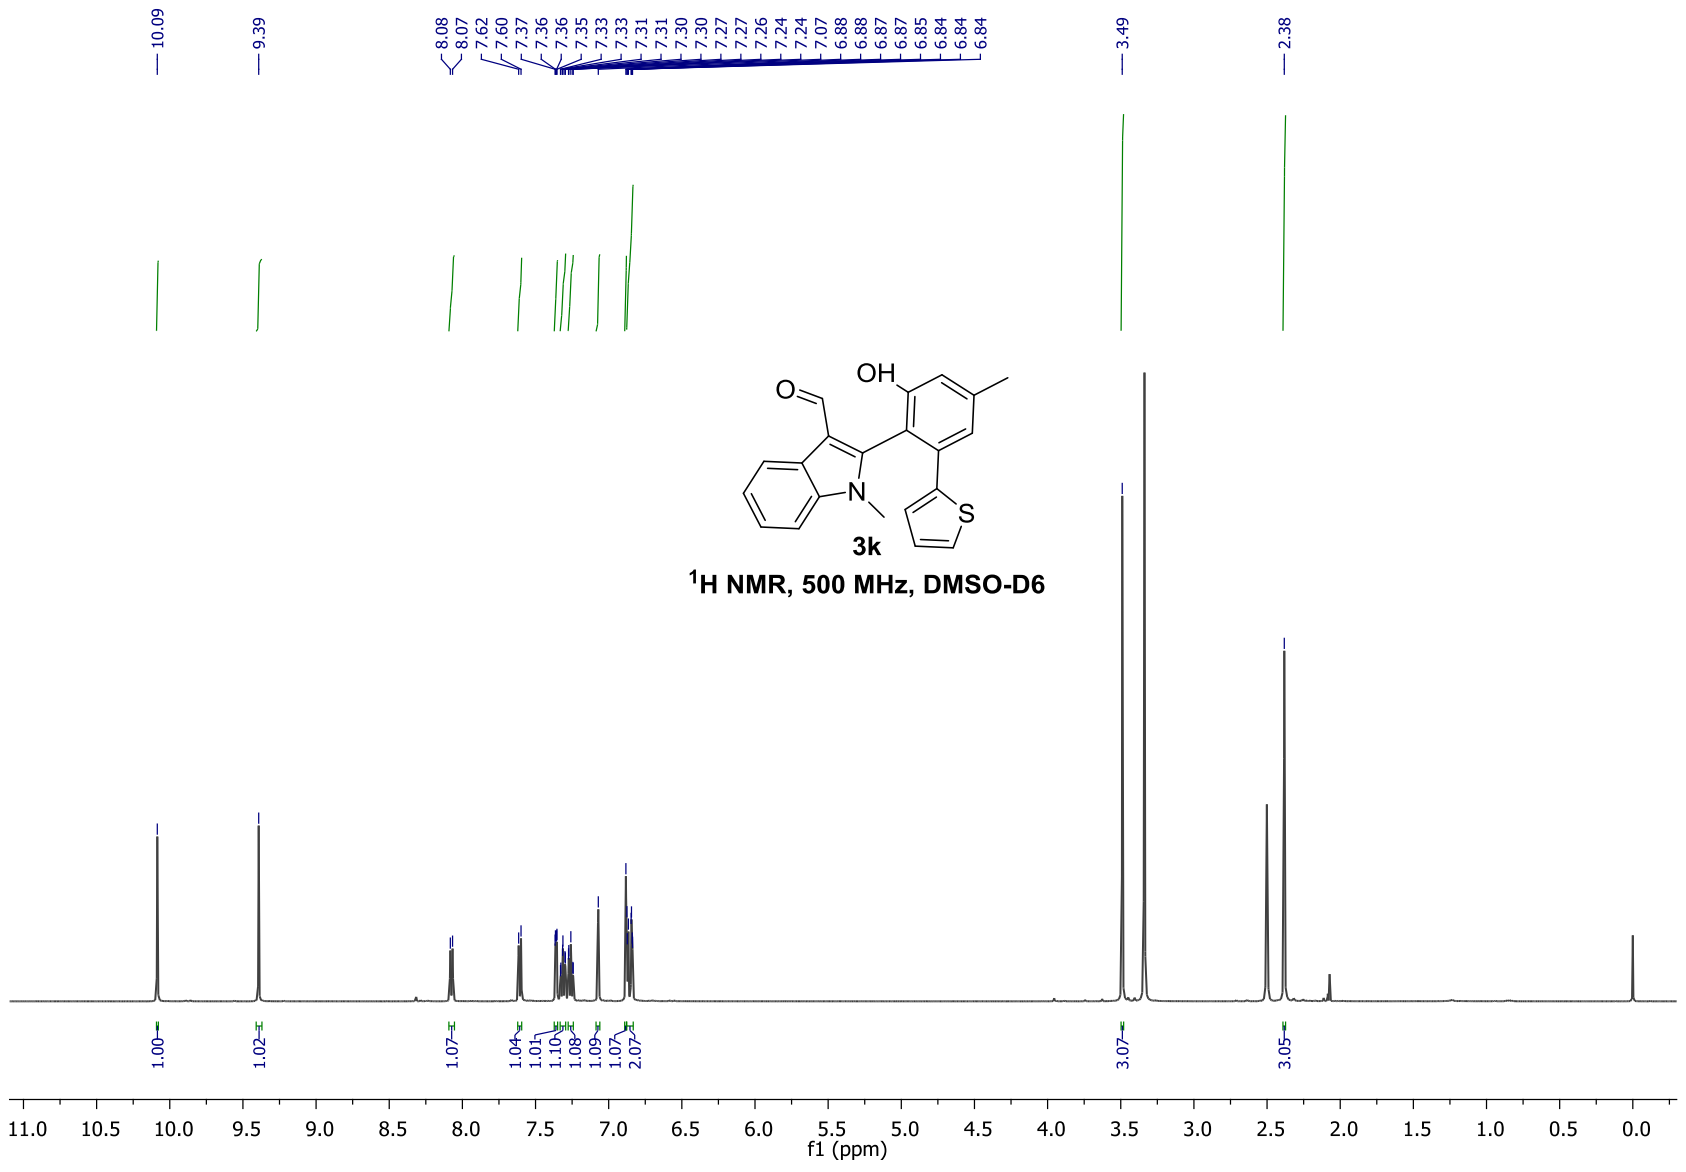

KARNA-M00093

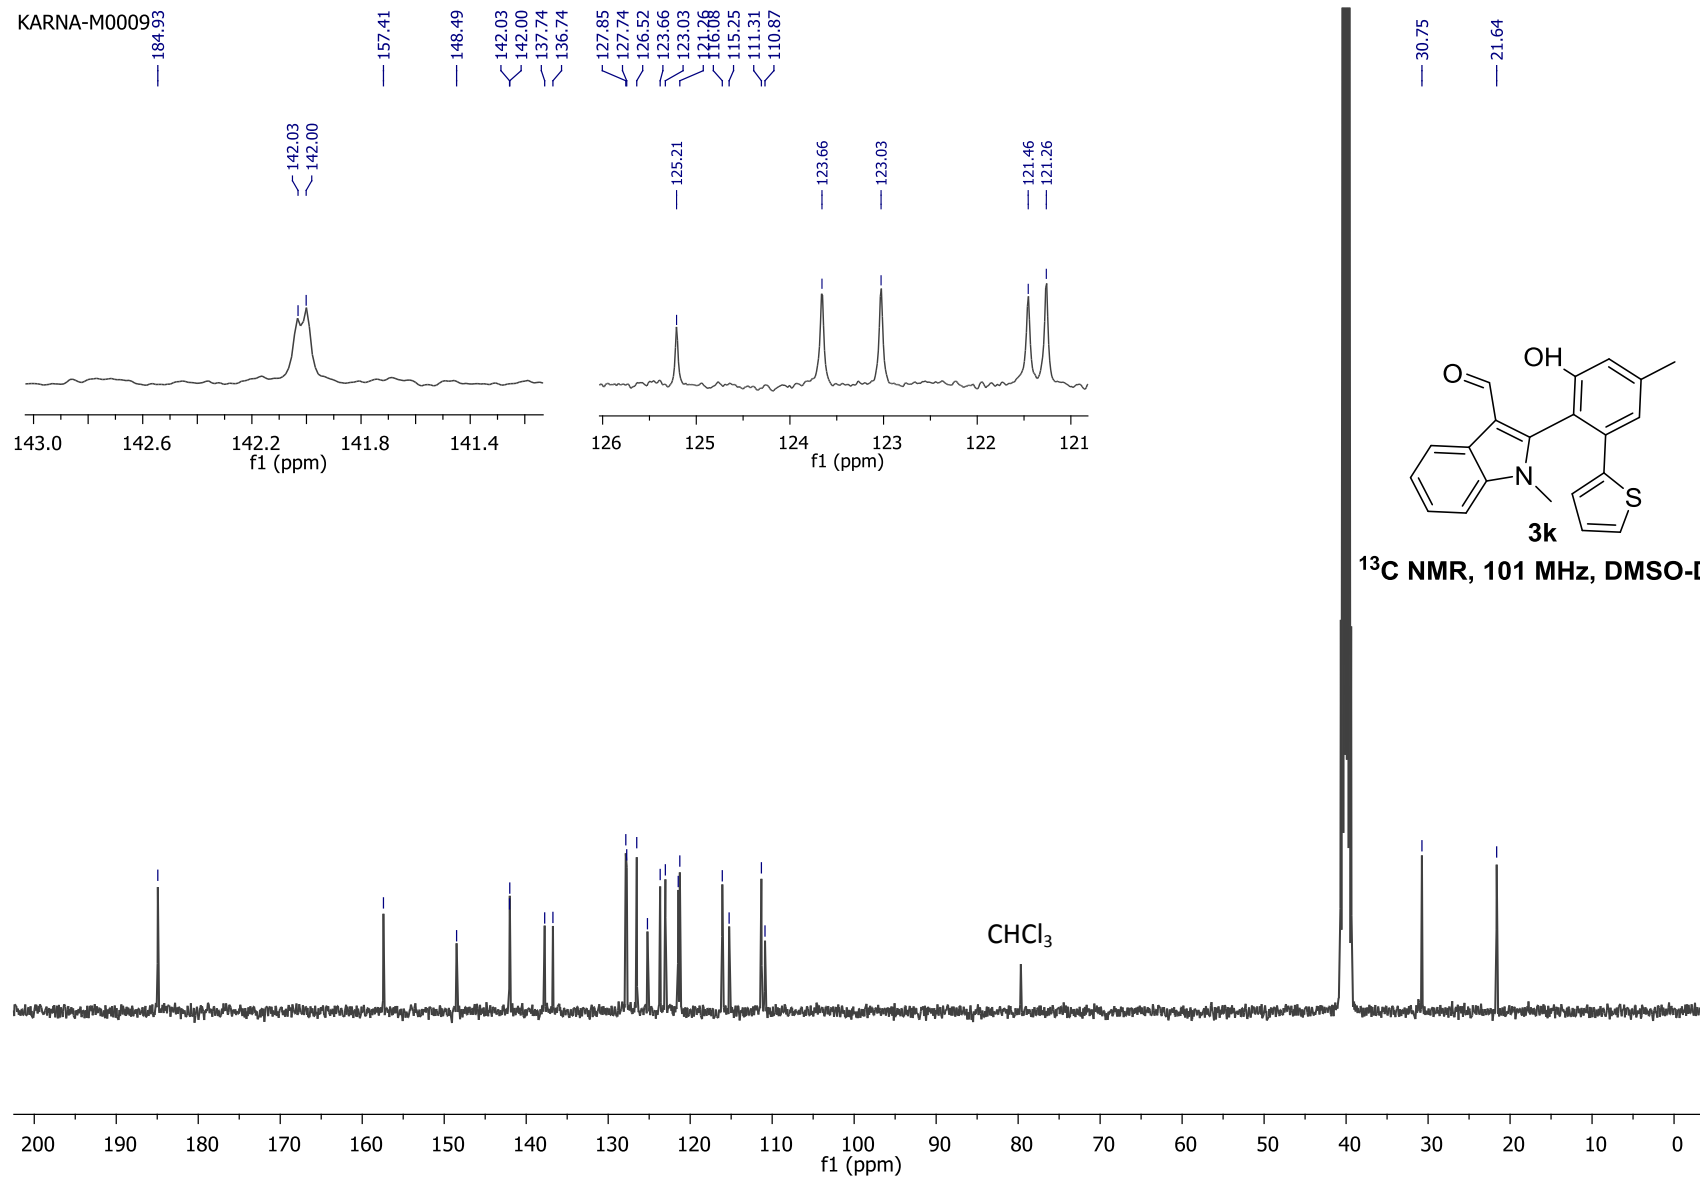

KARNA M0009

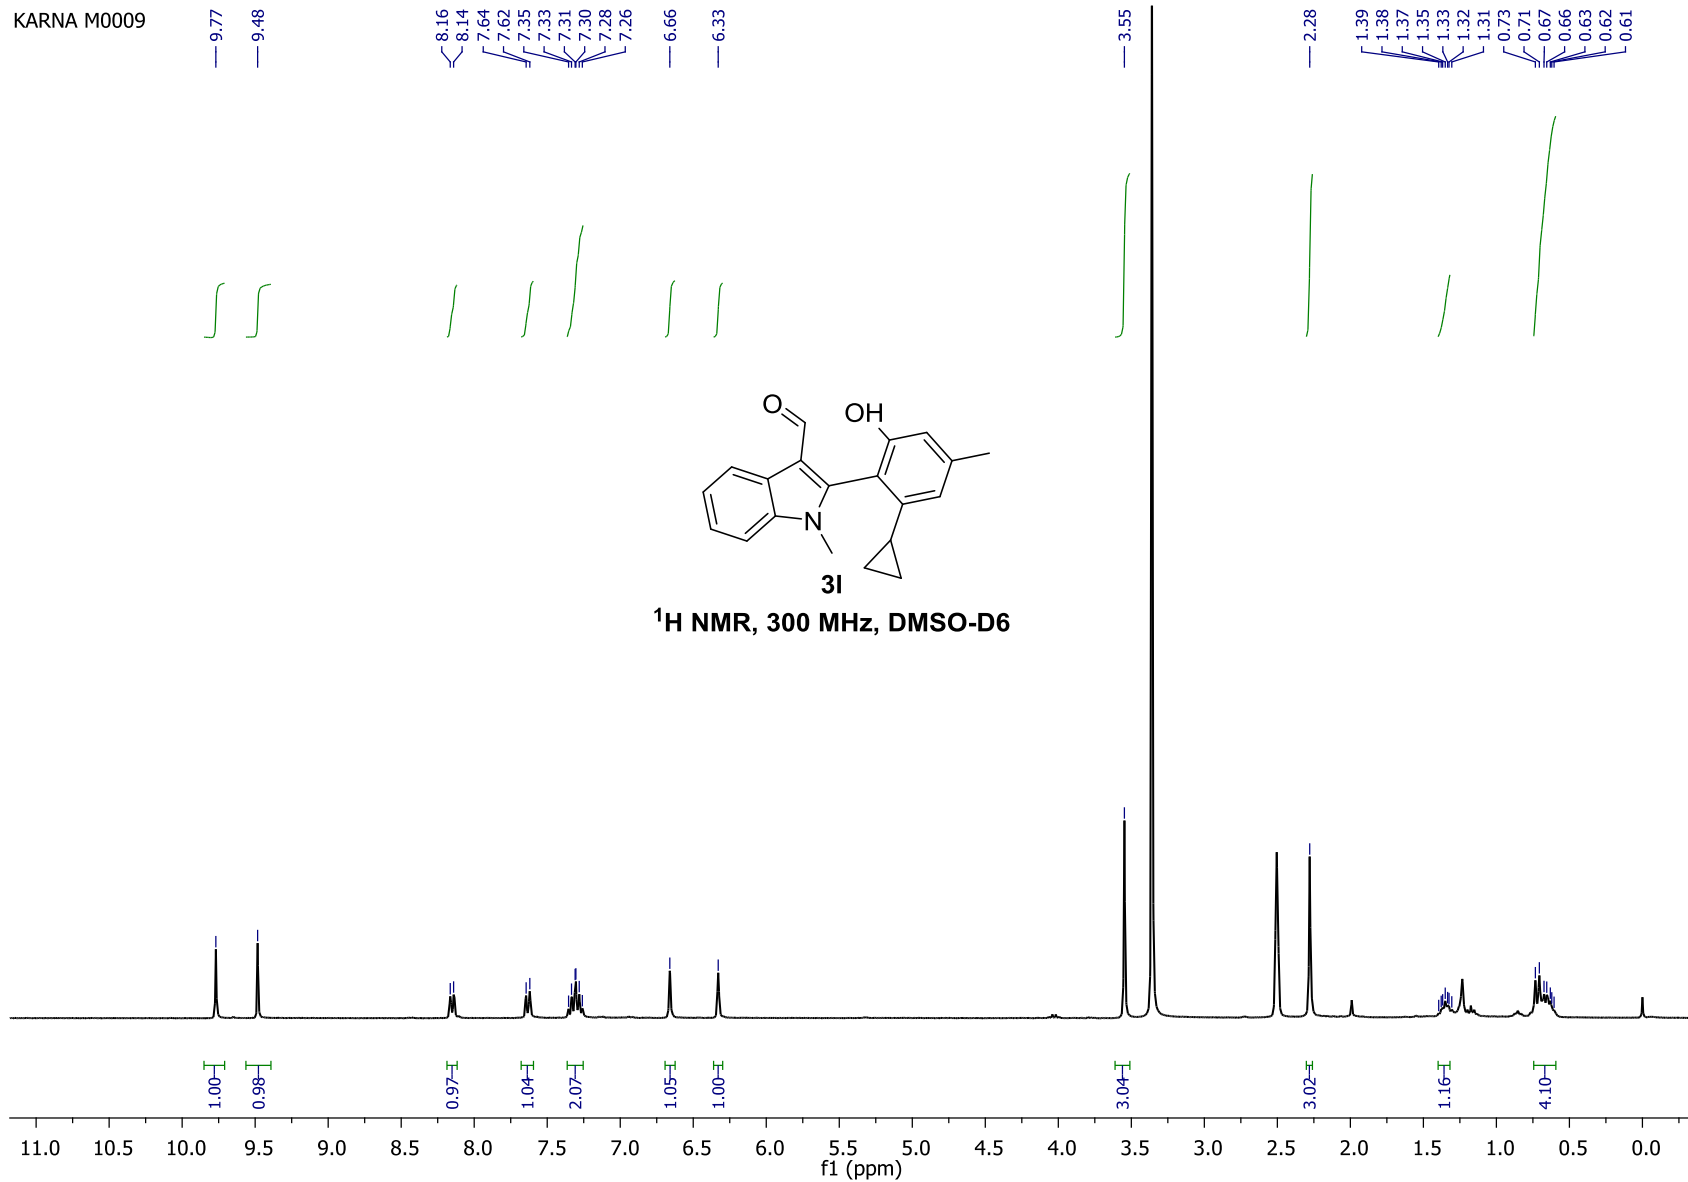

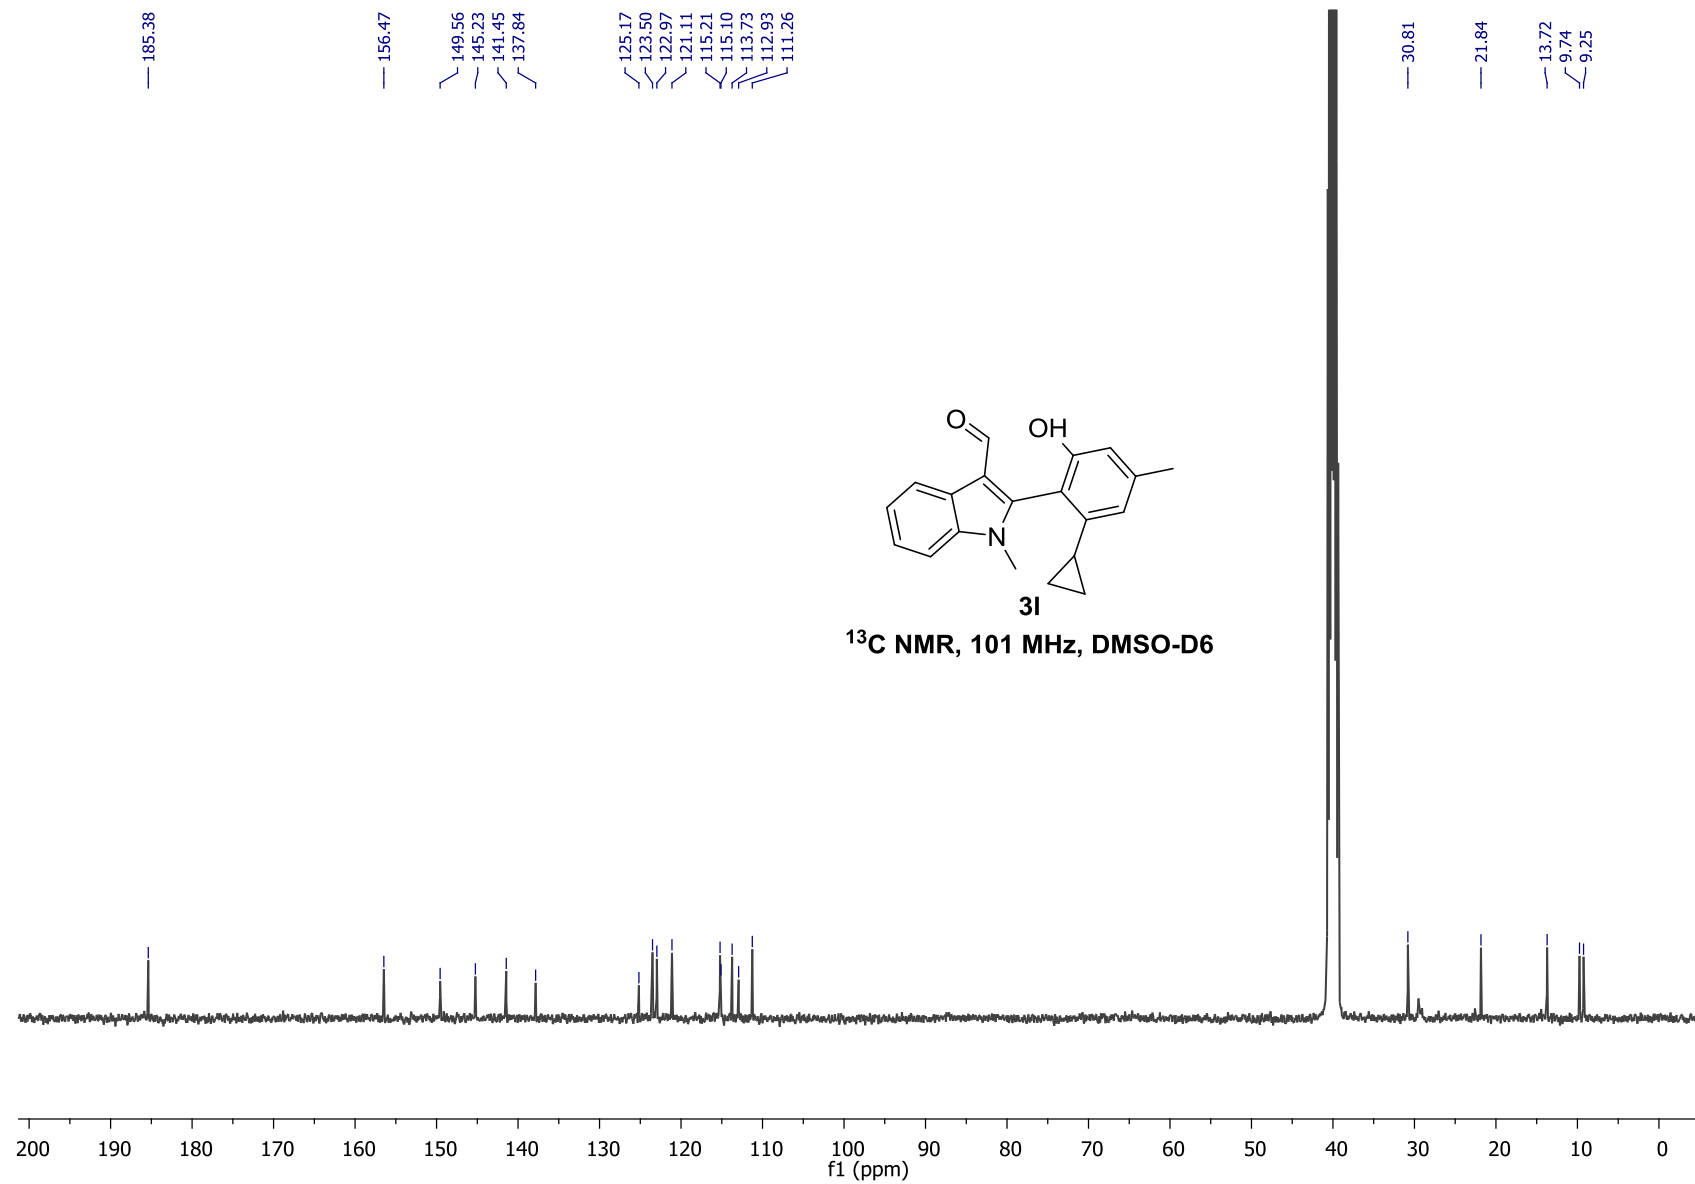

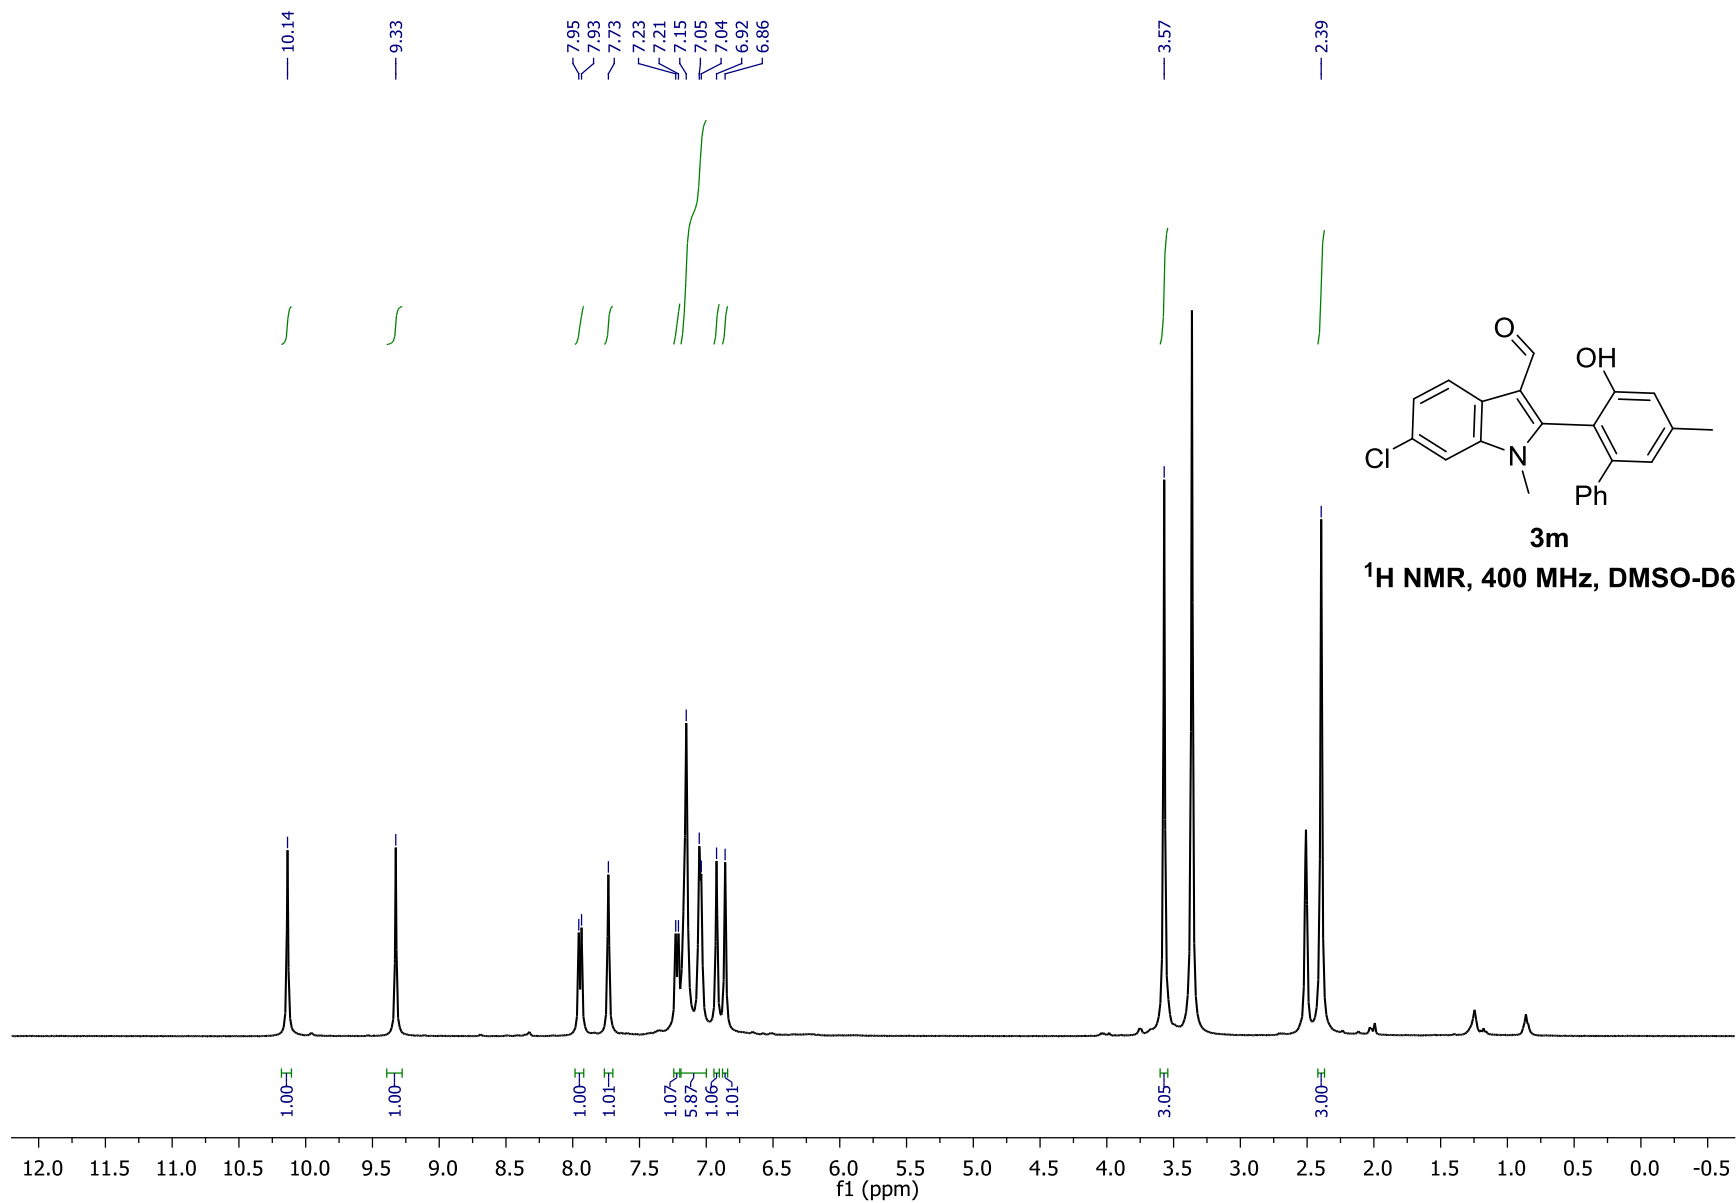

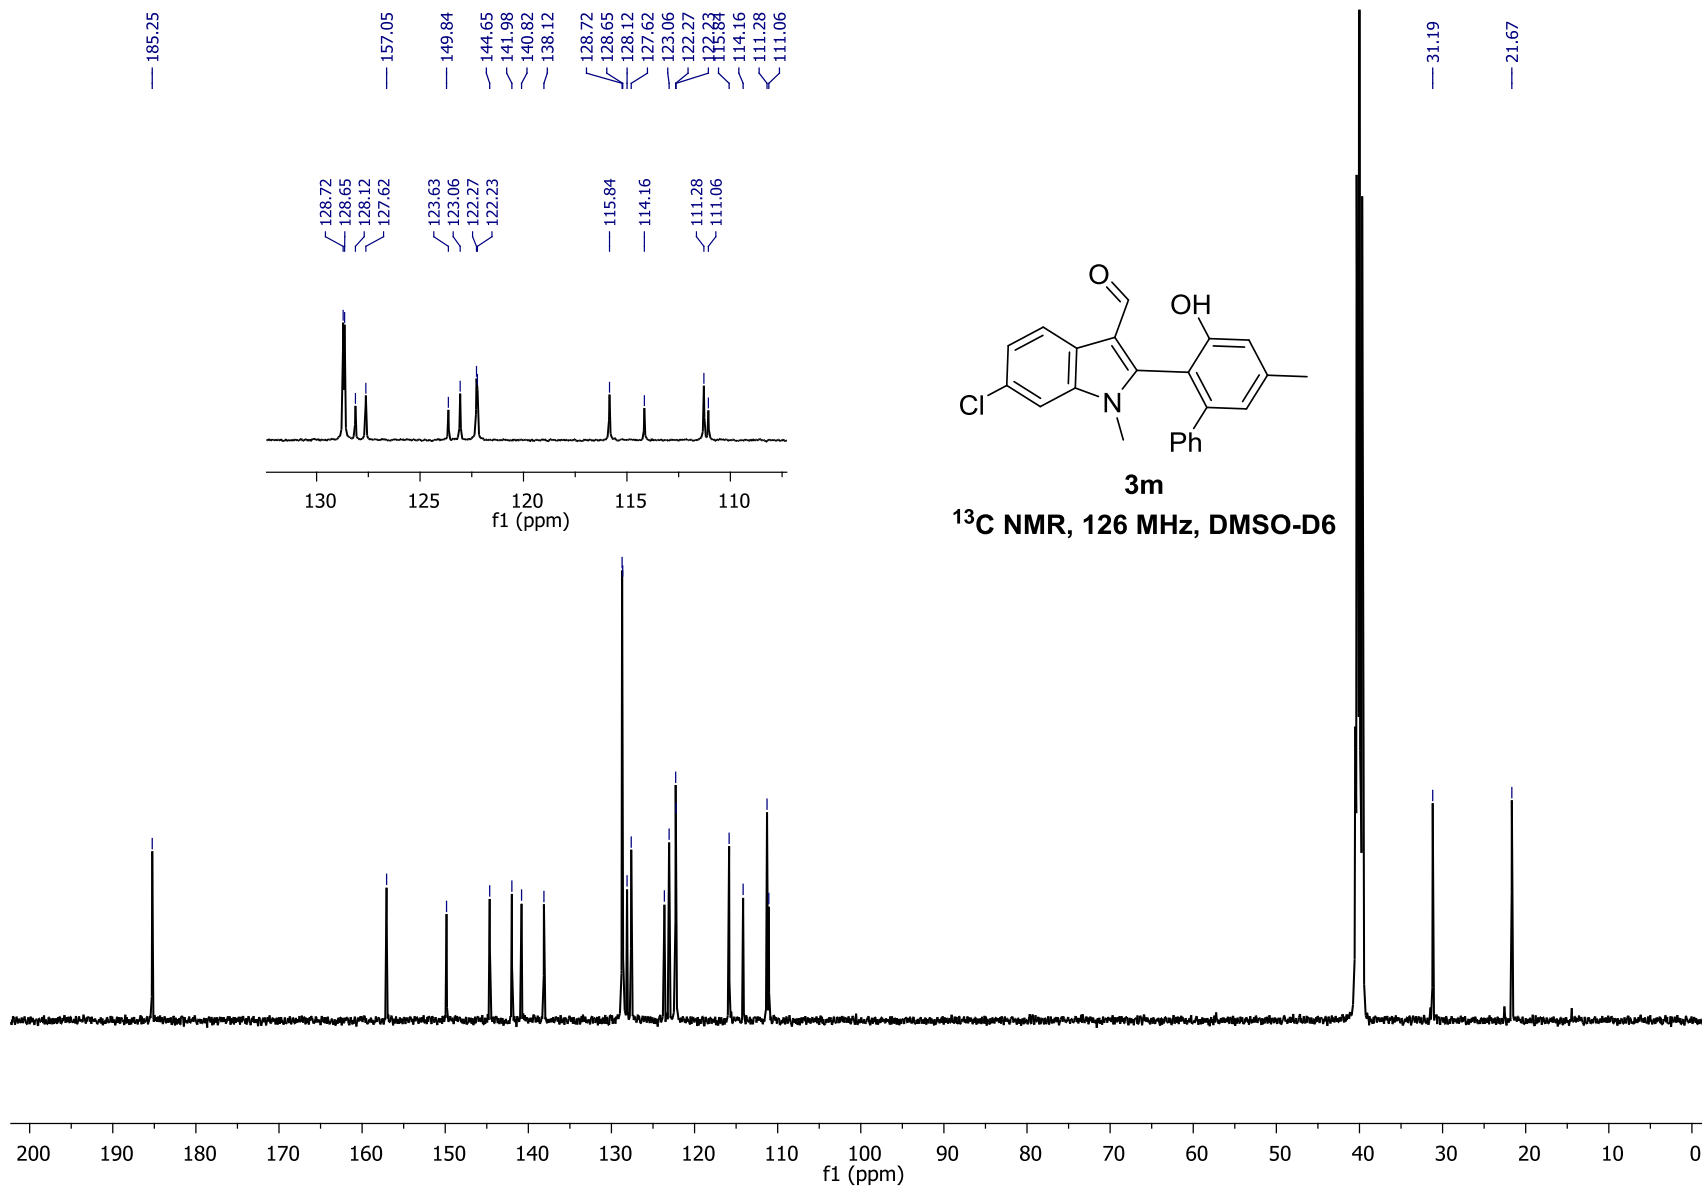



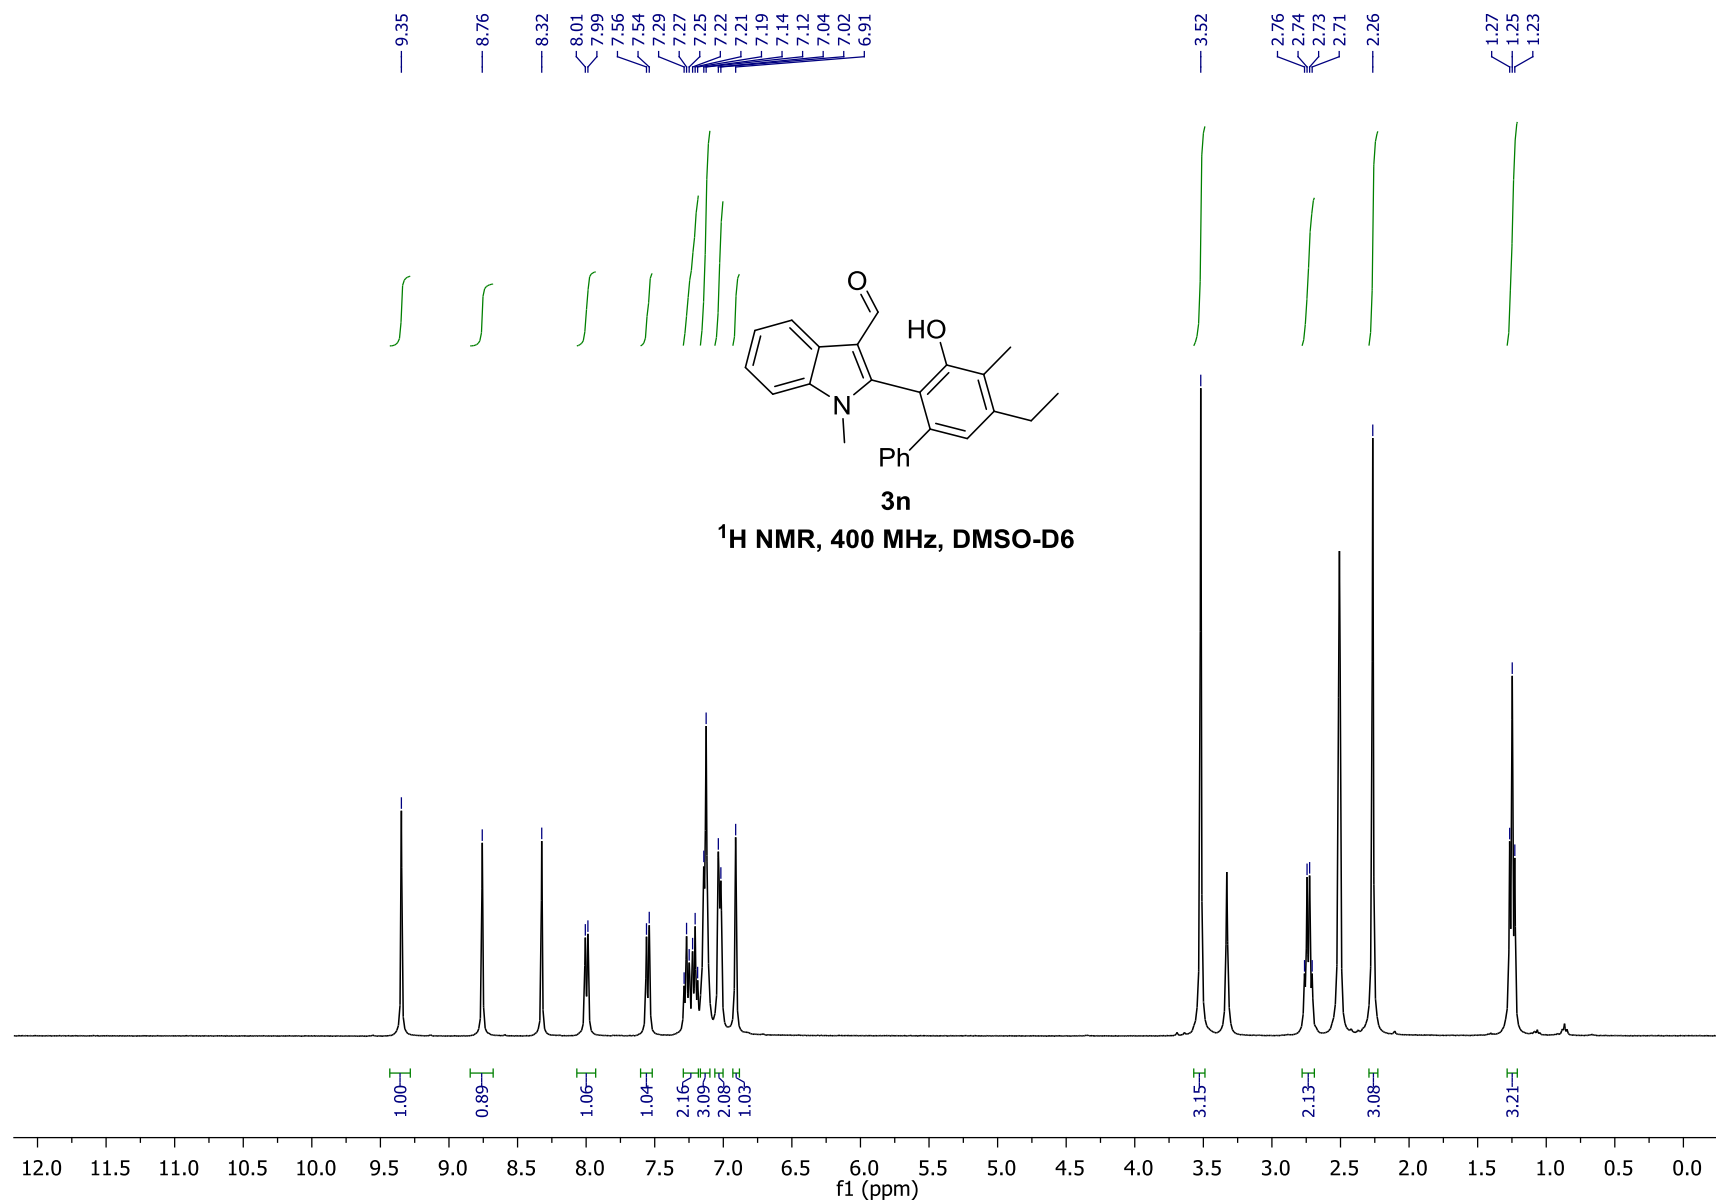

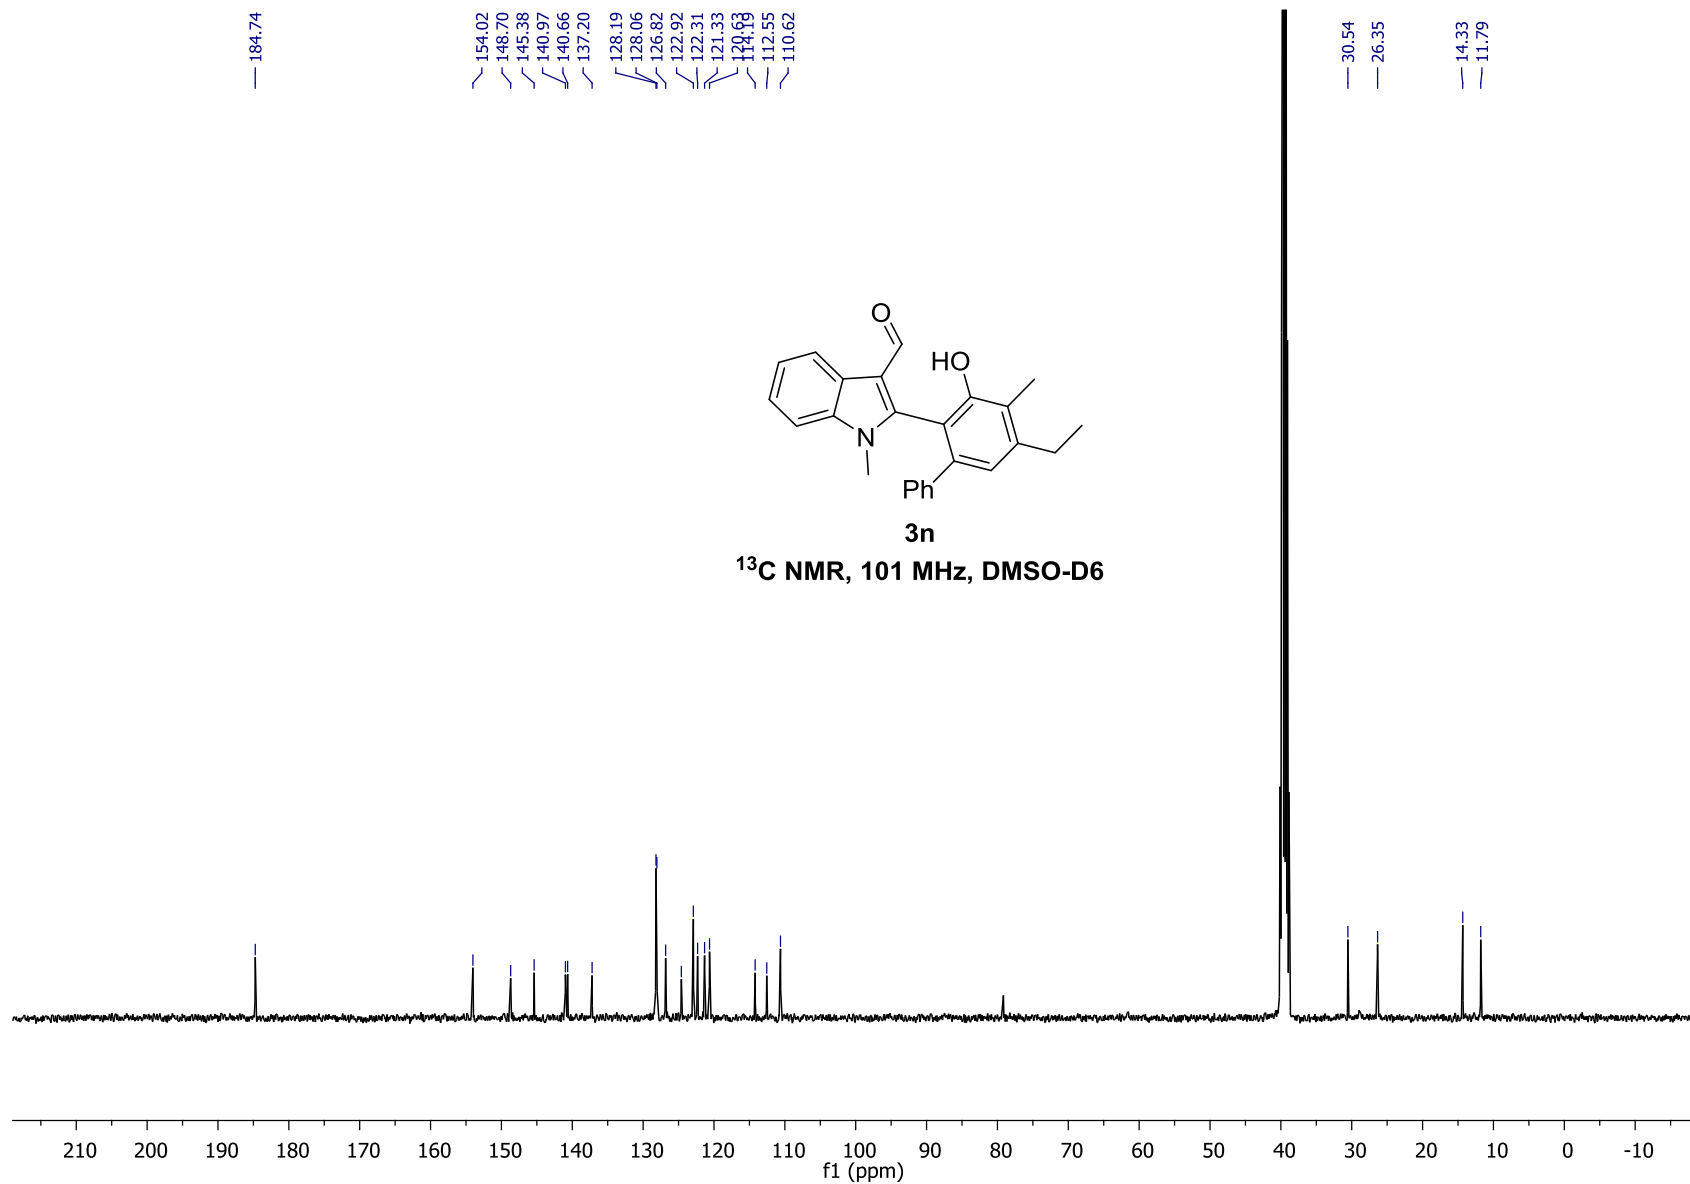

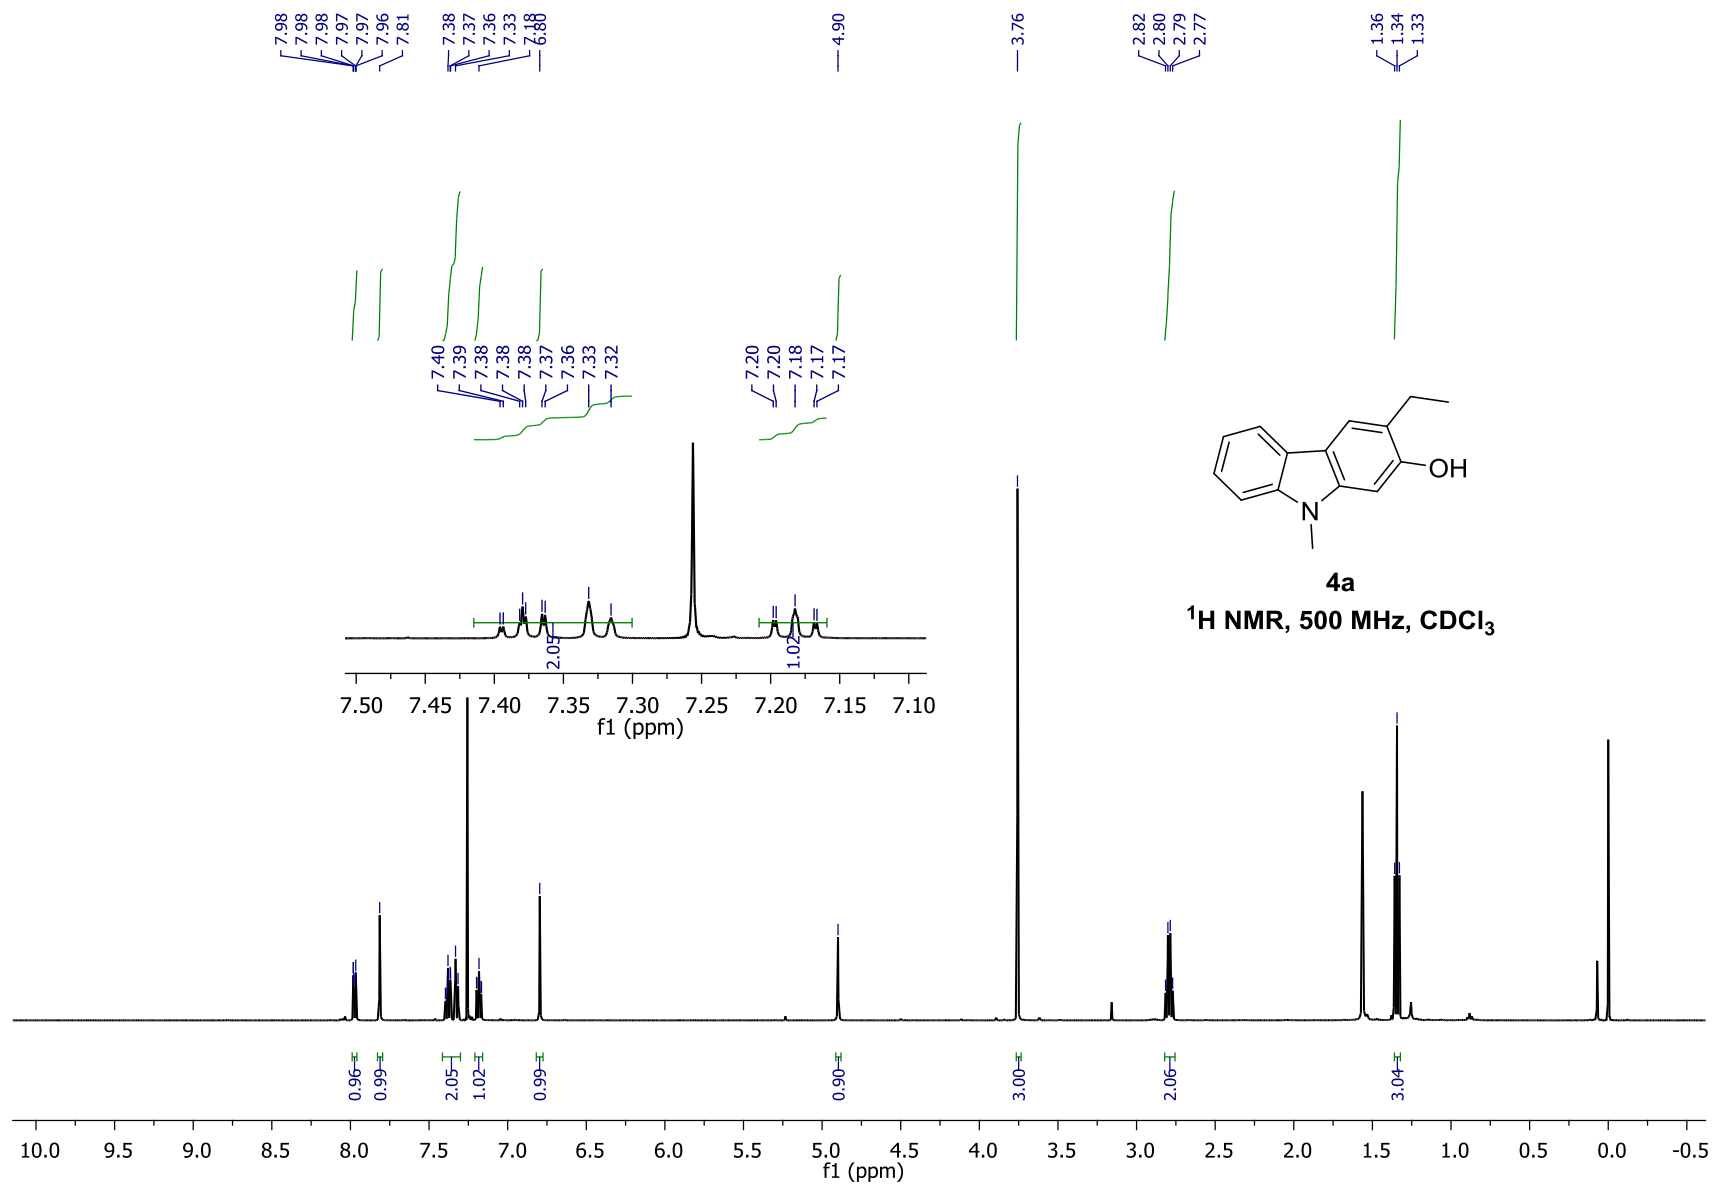

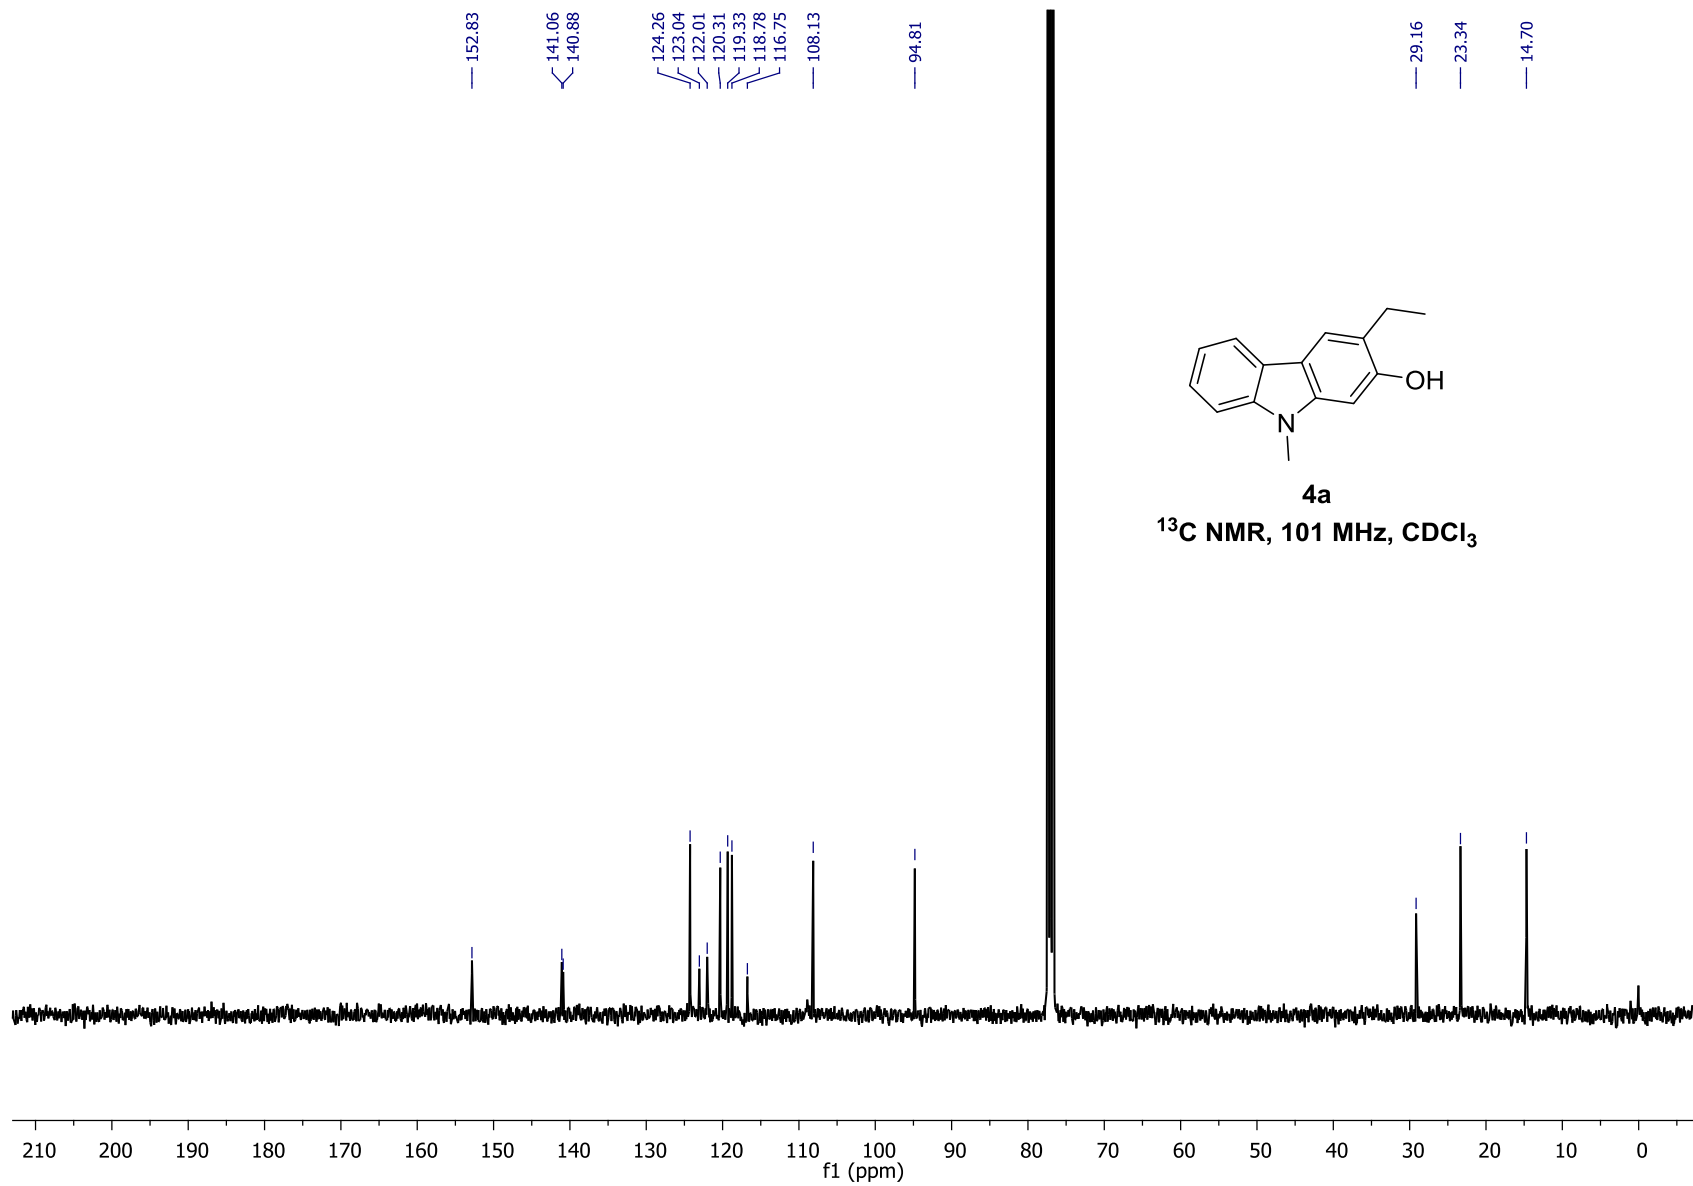

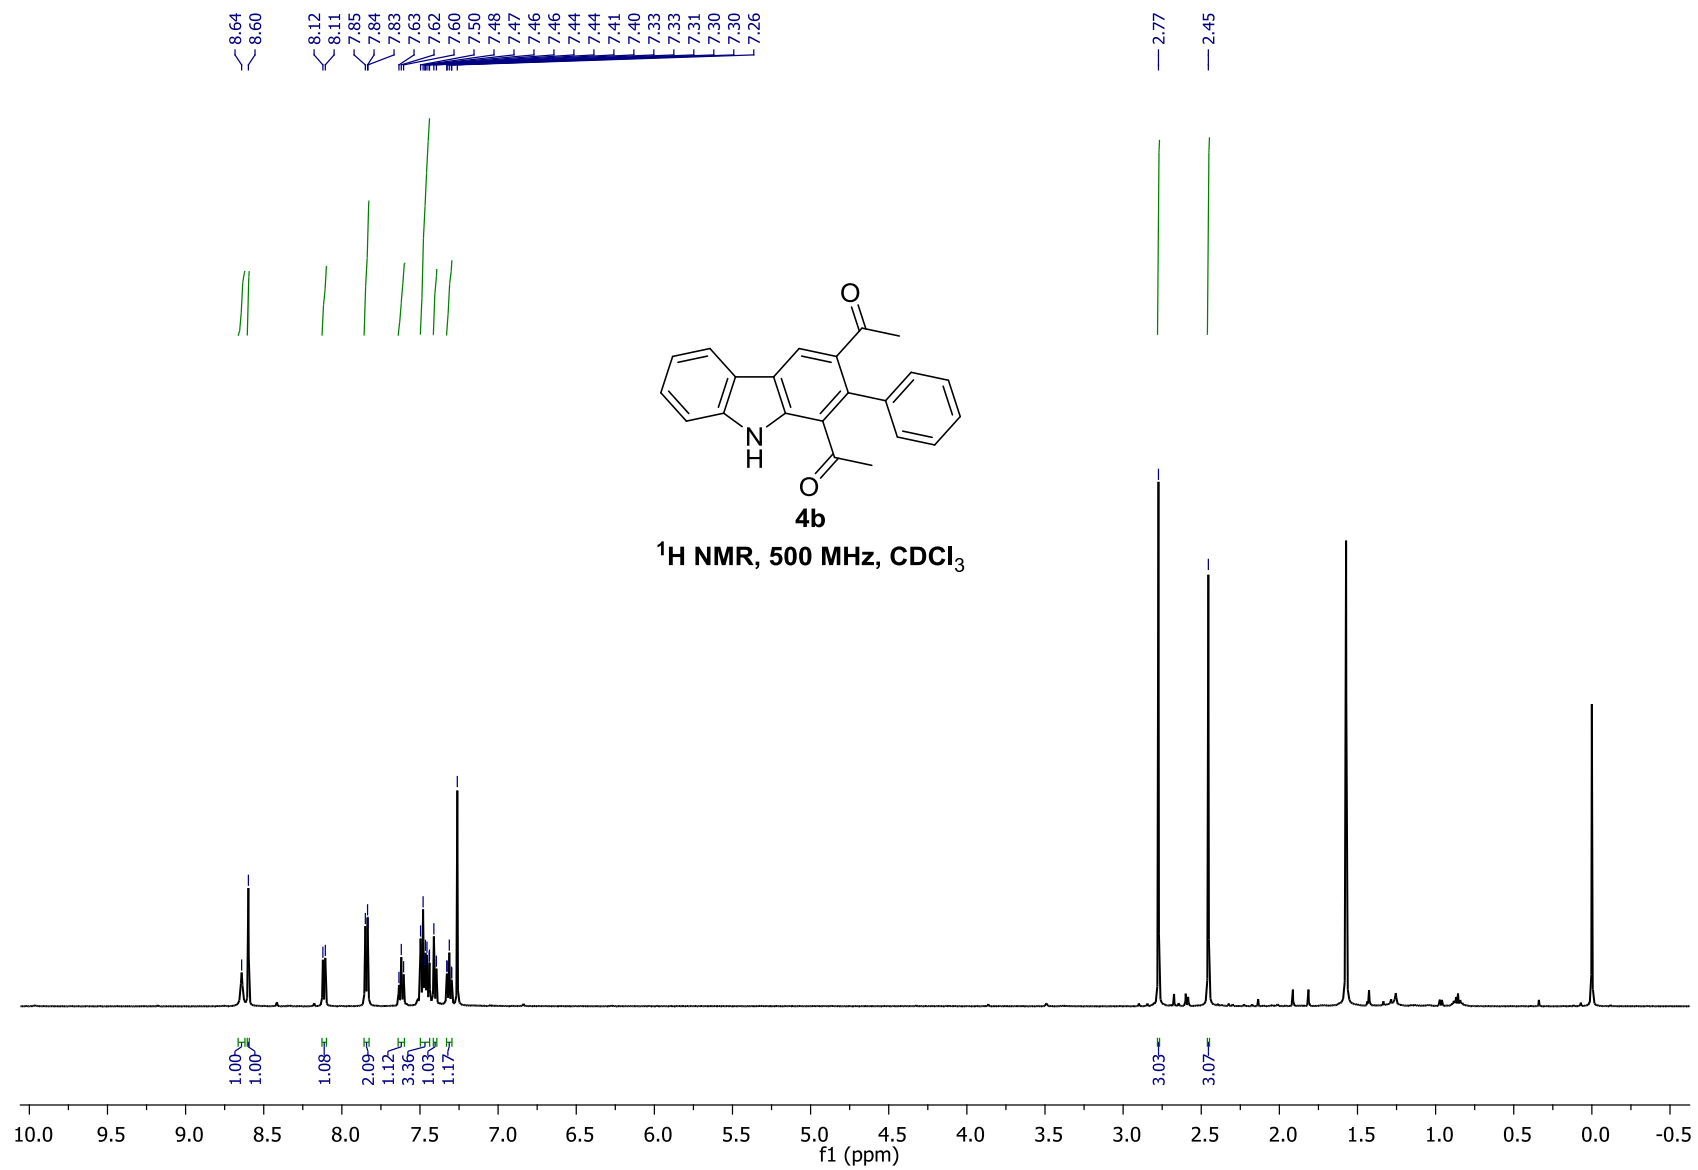

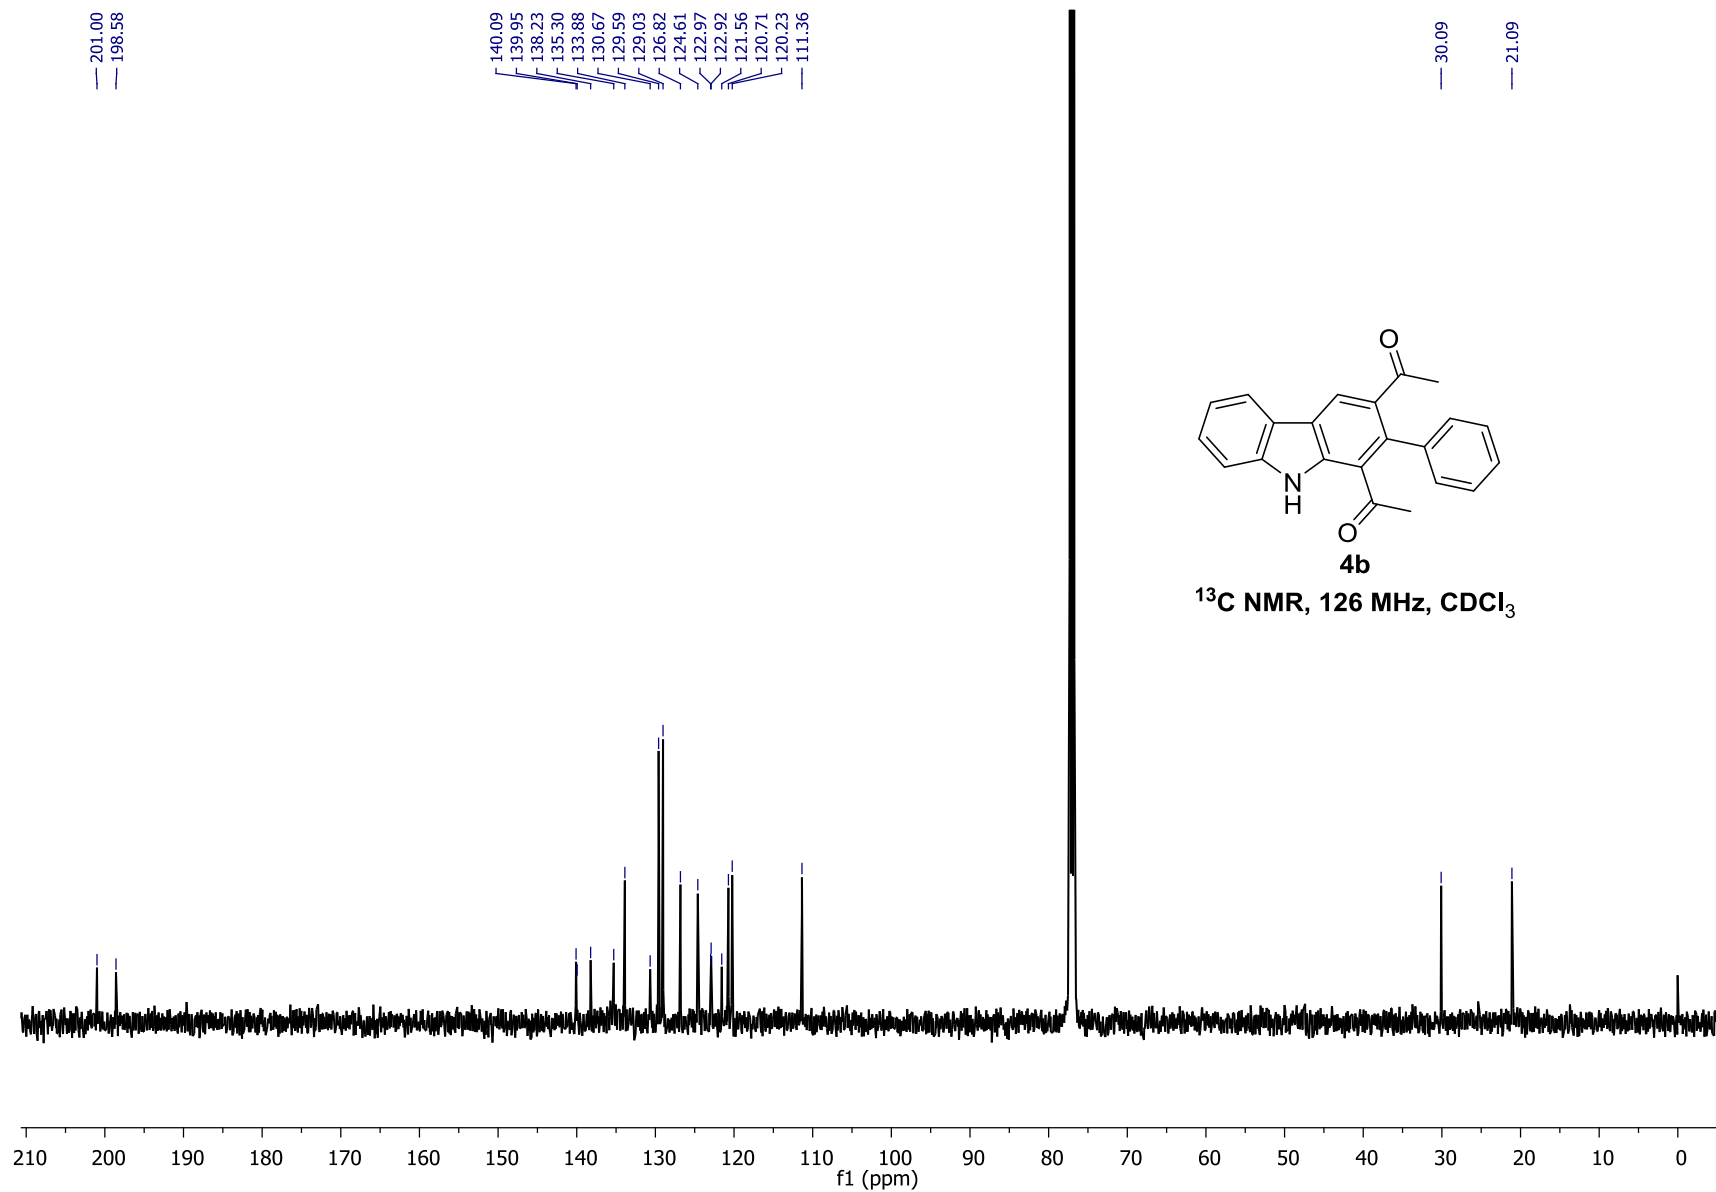

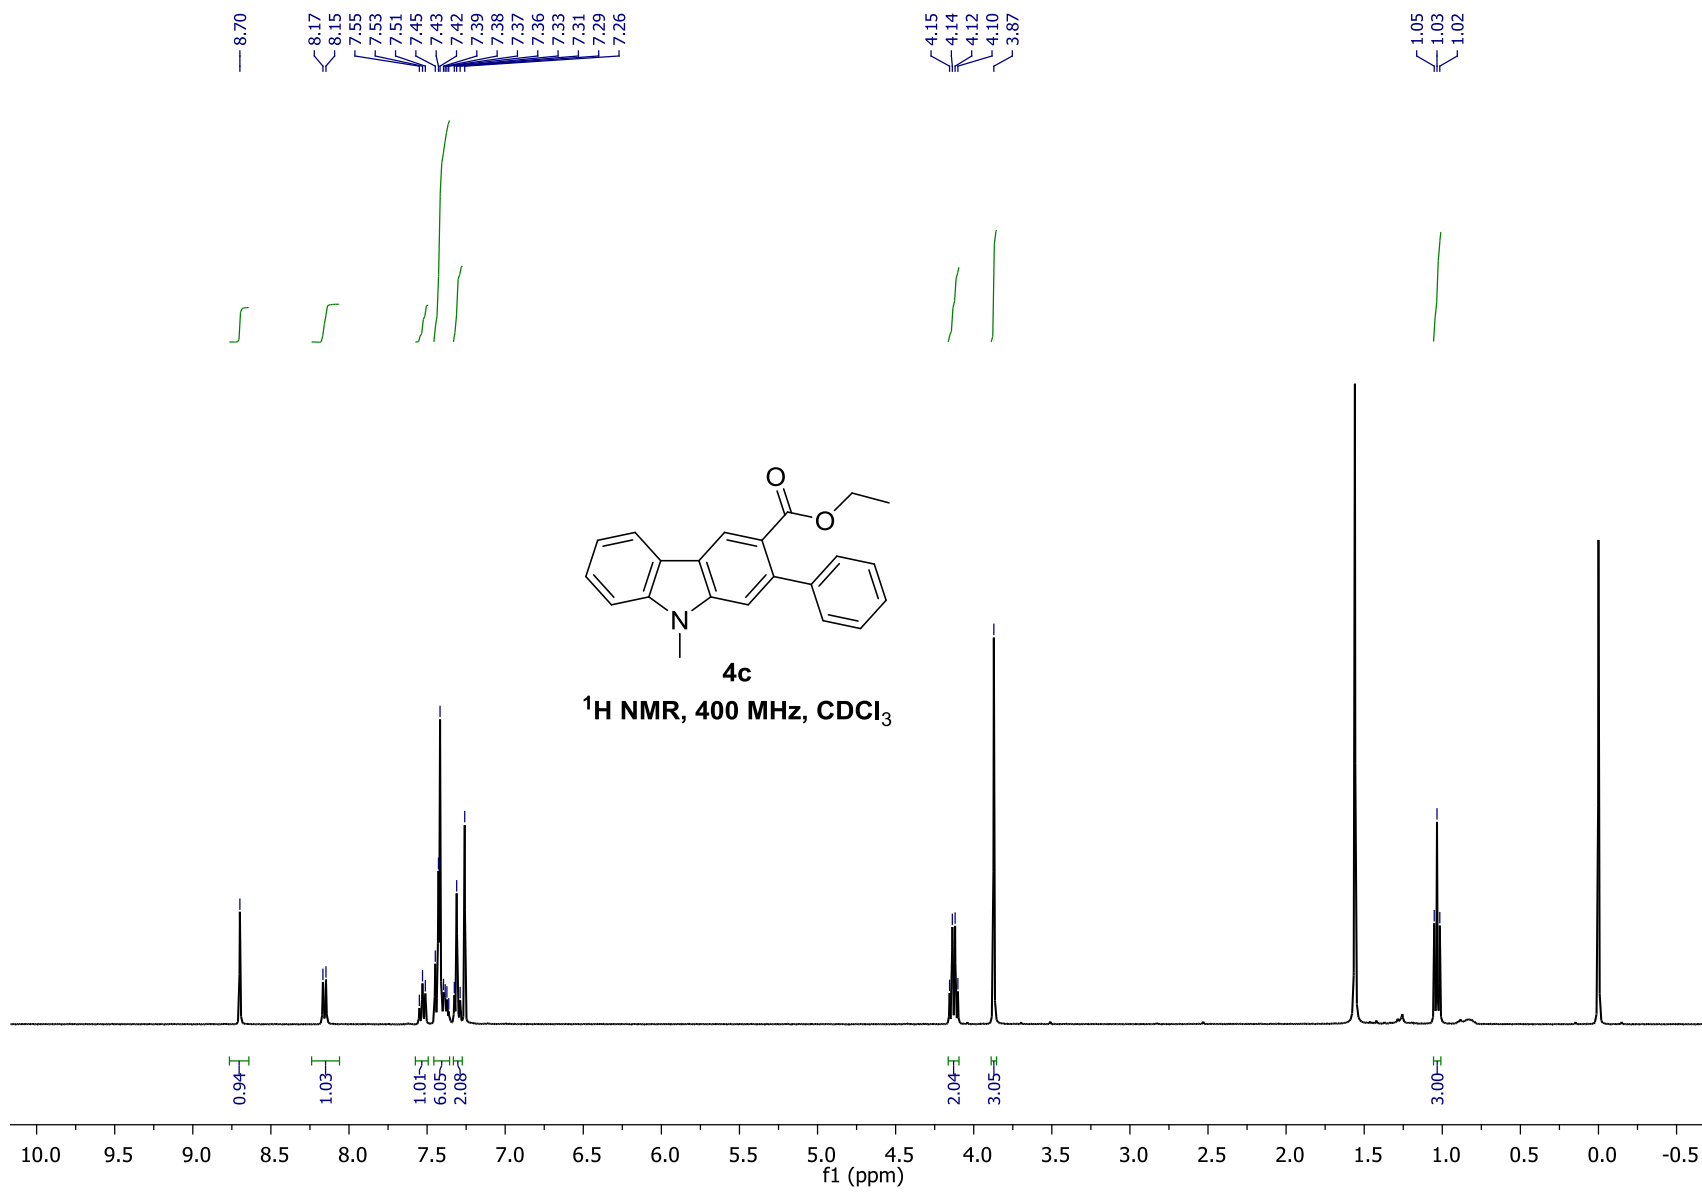

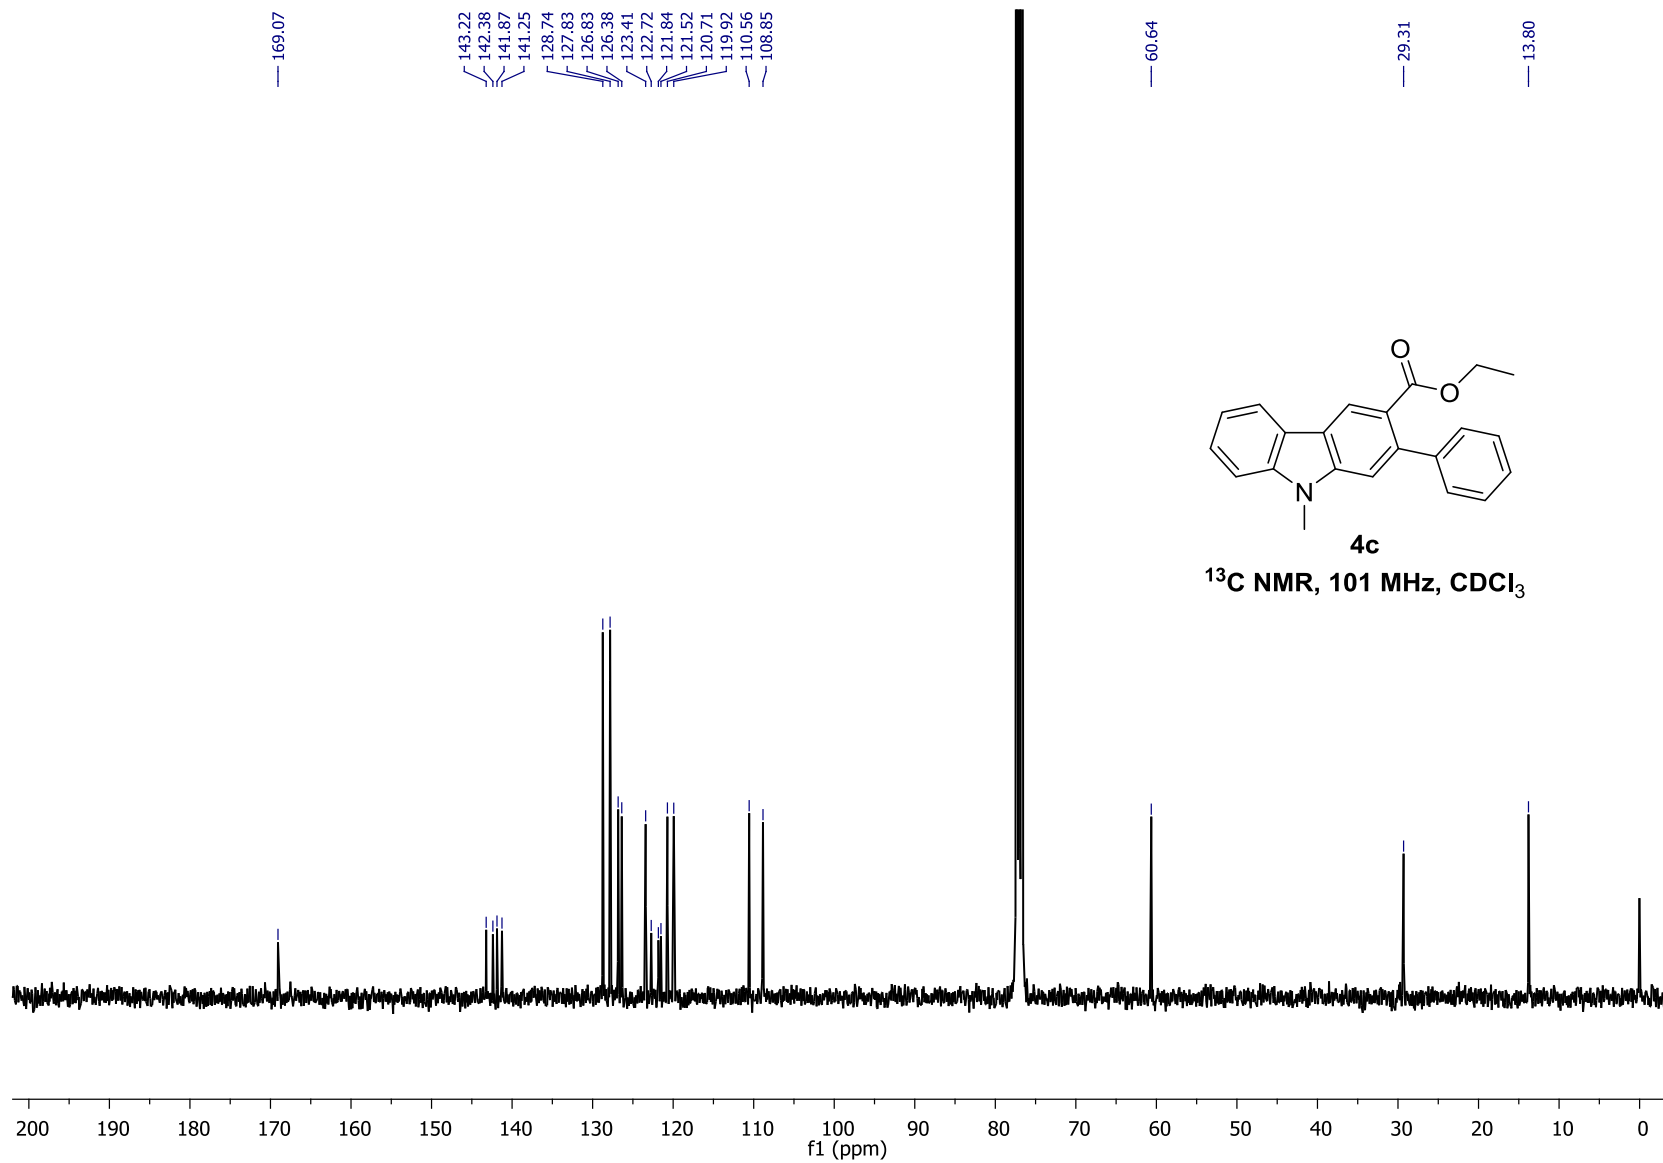



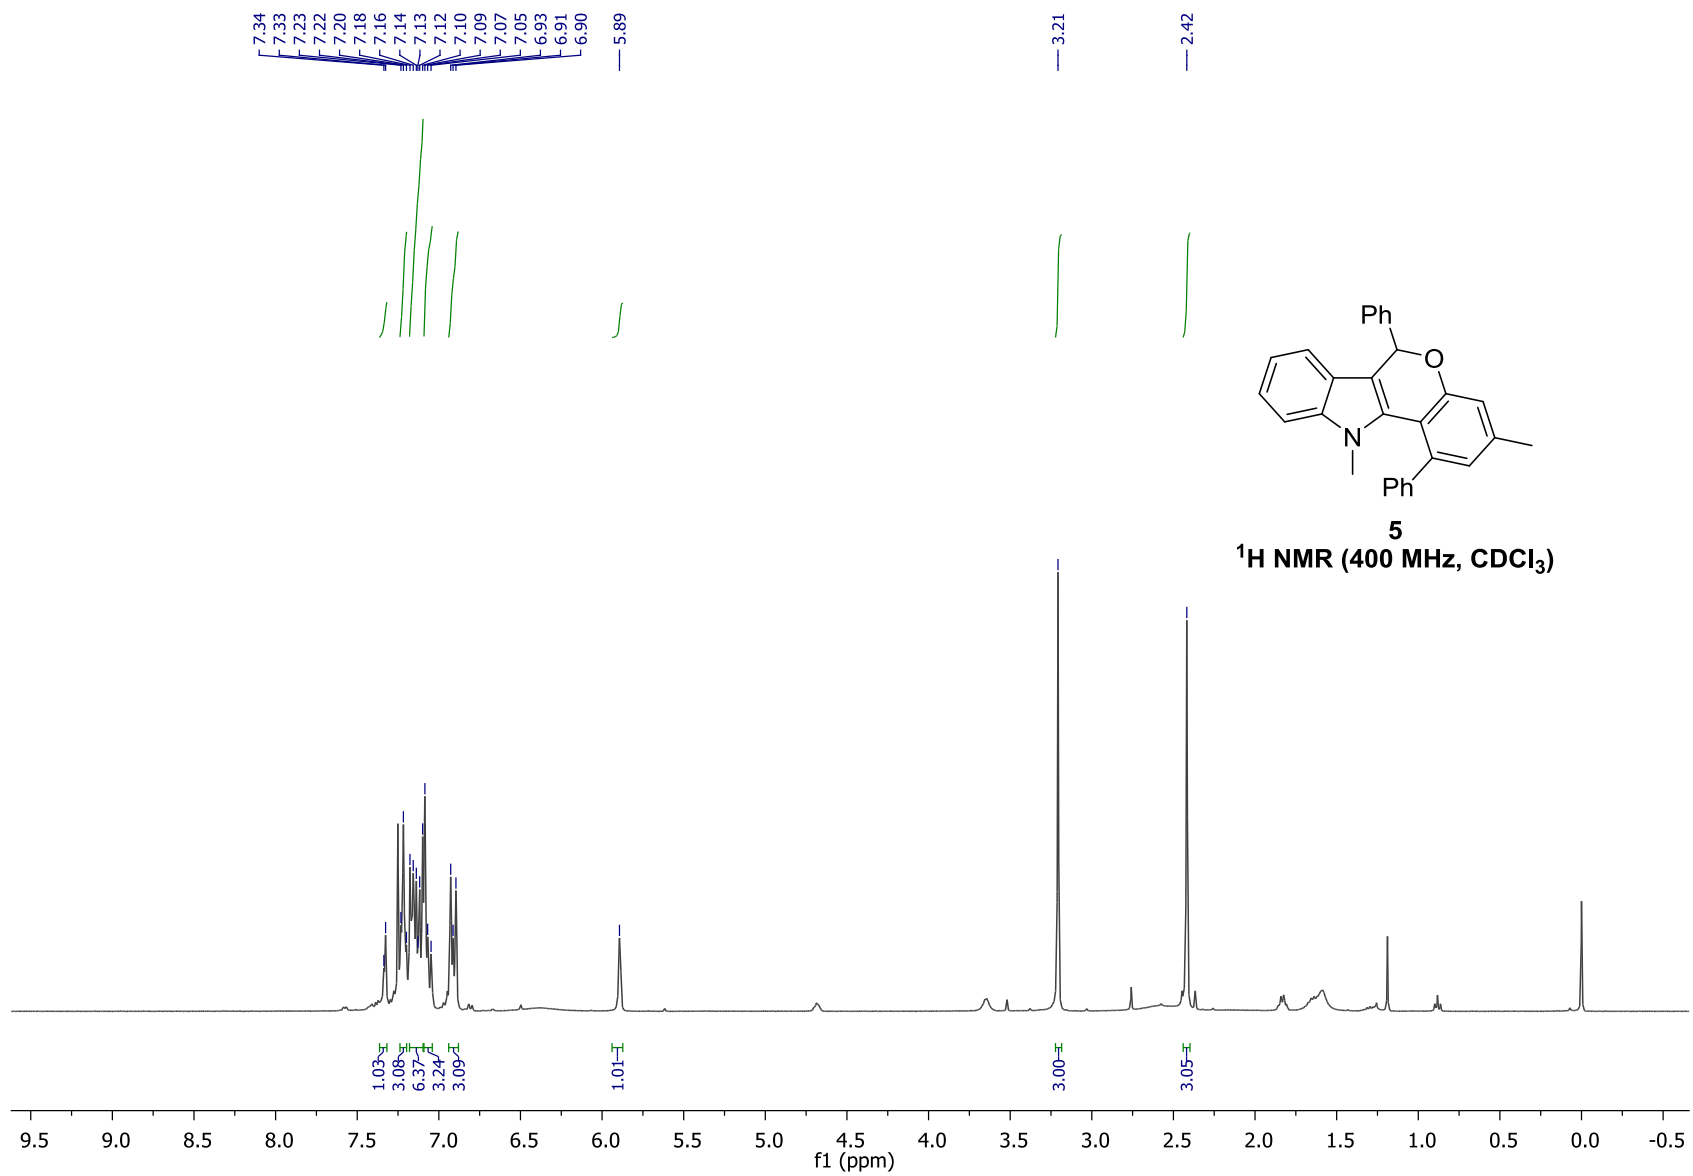

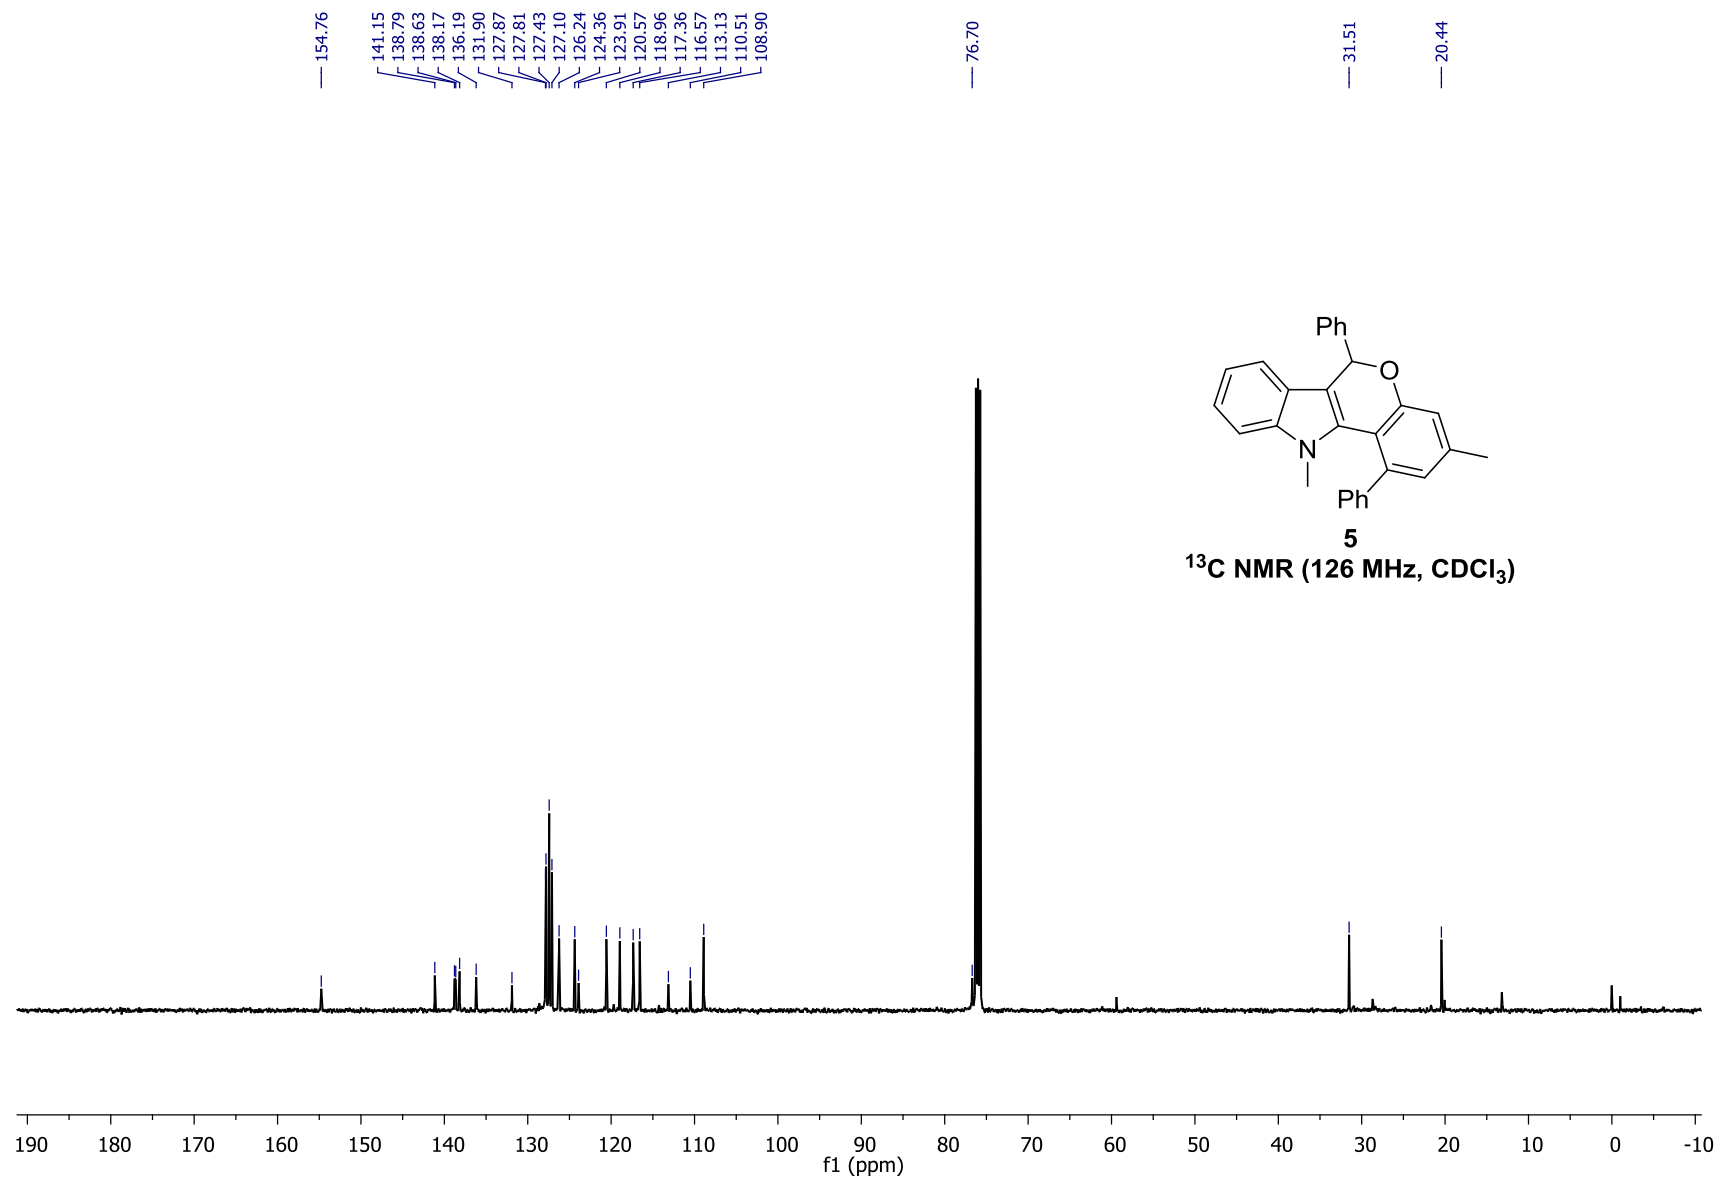

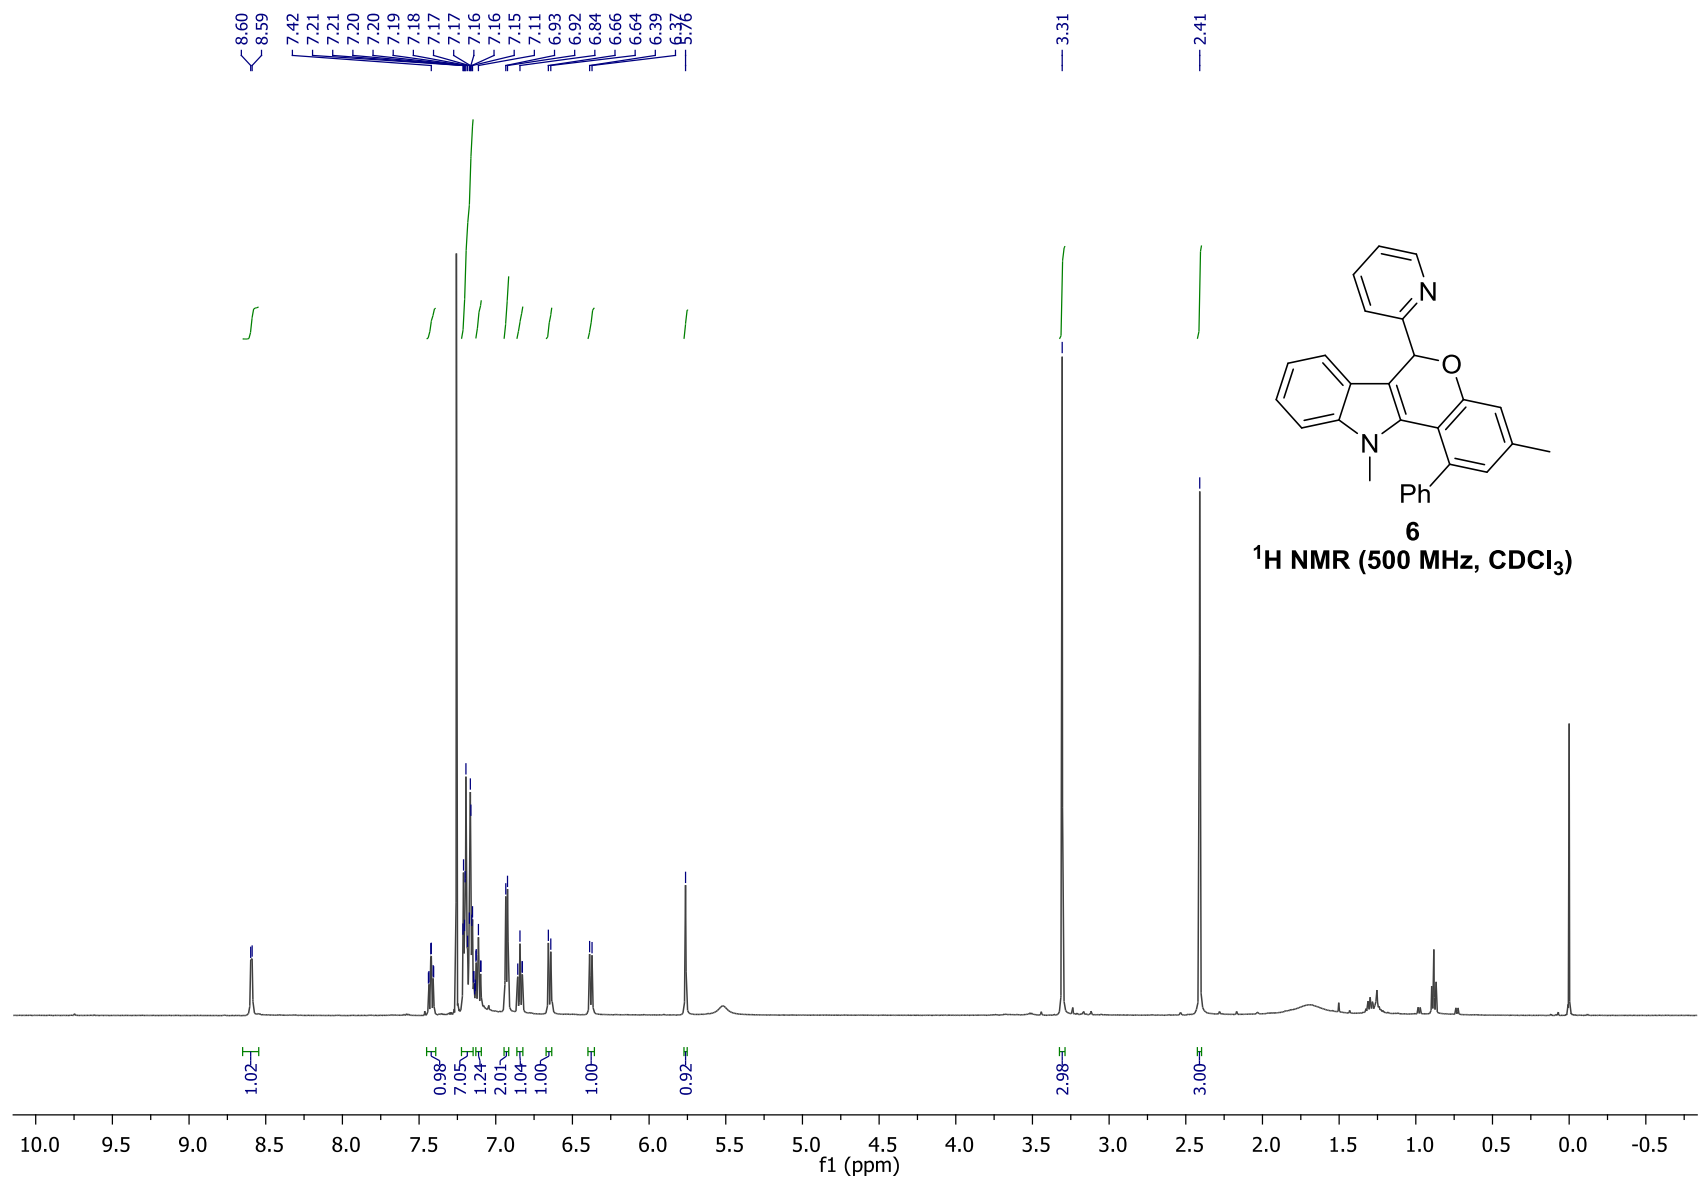

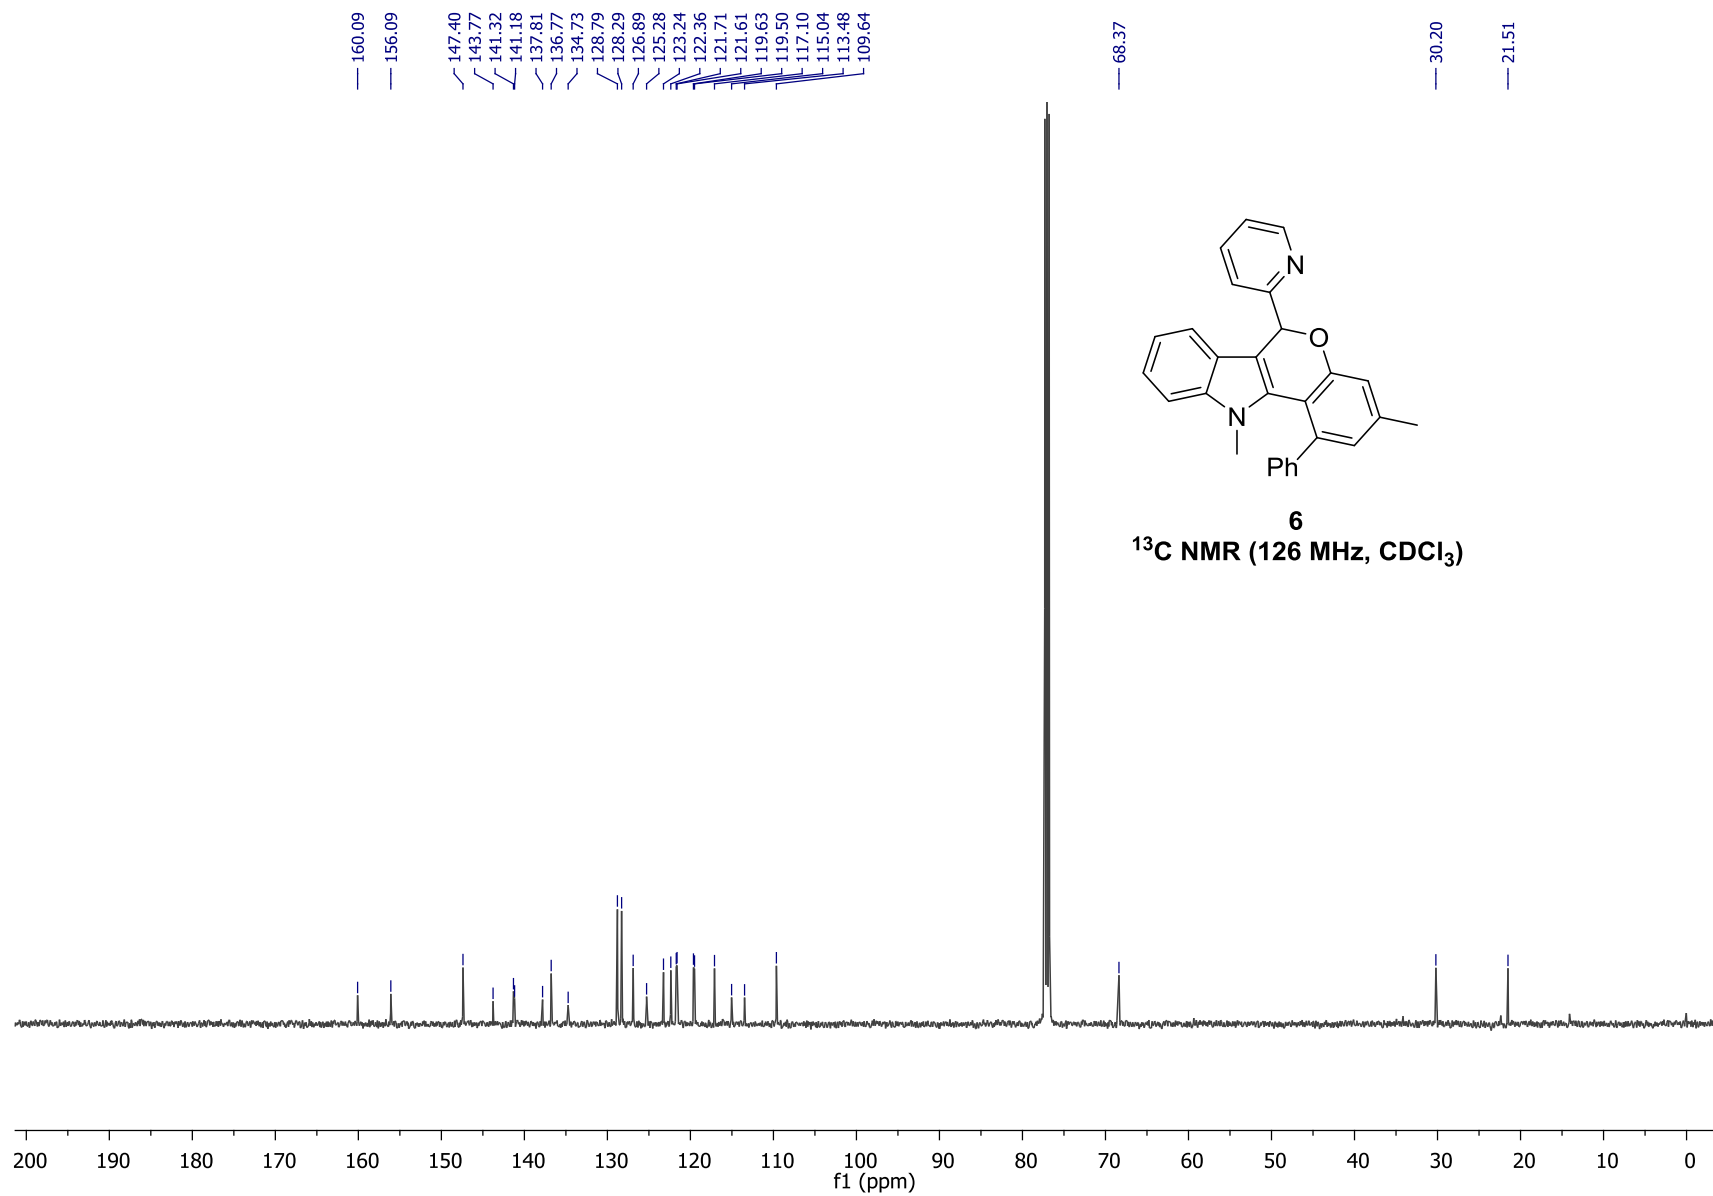

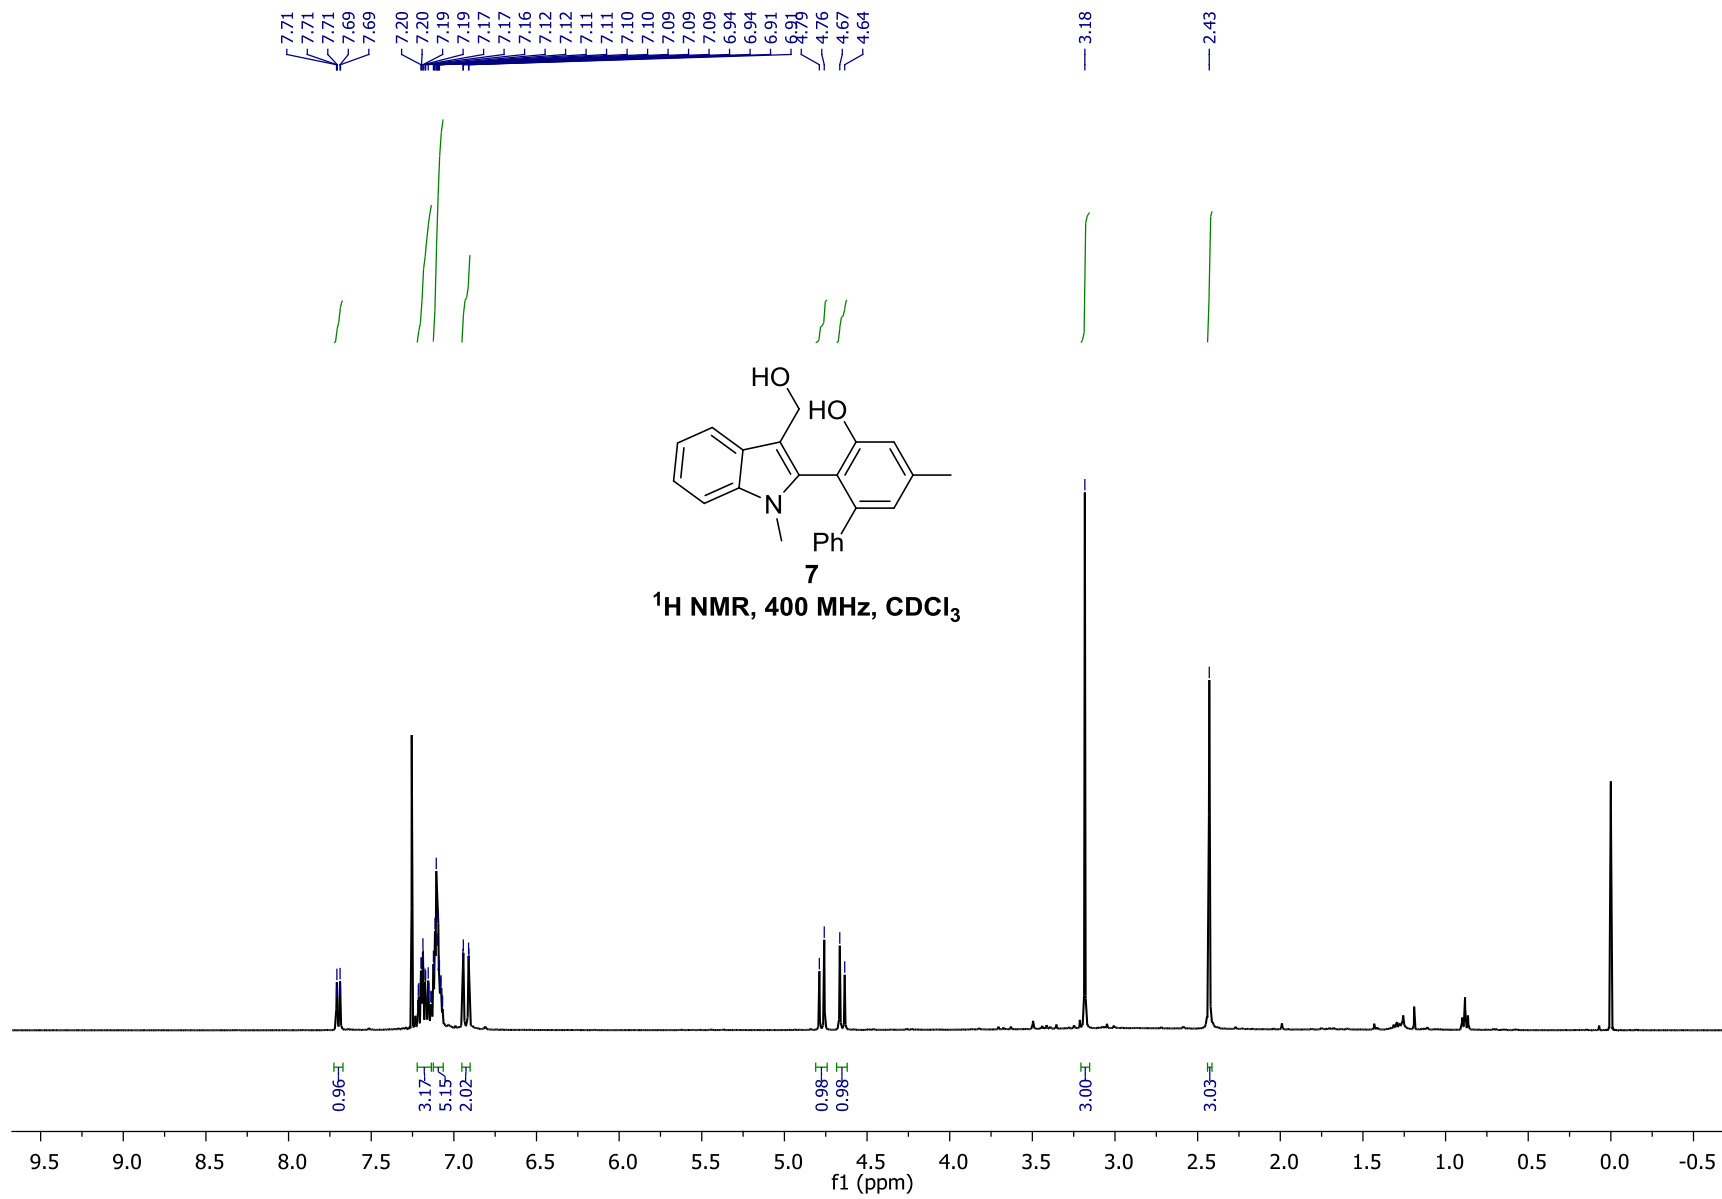

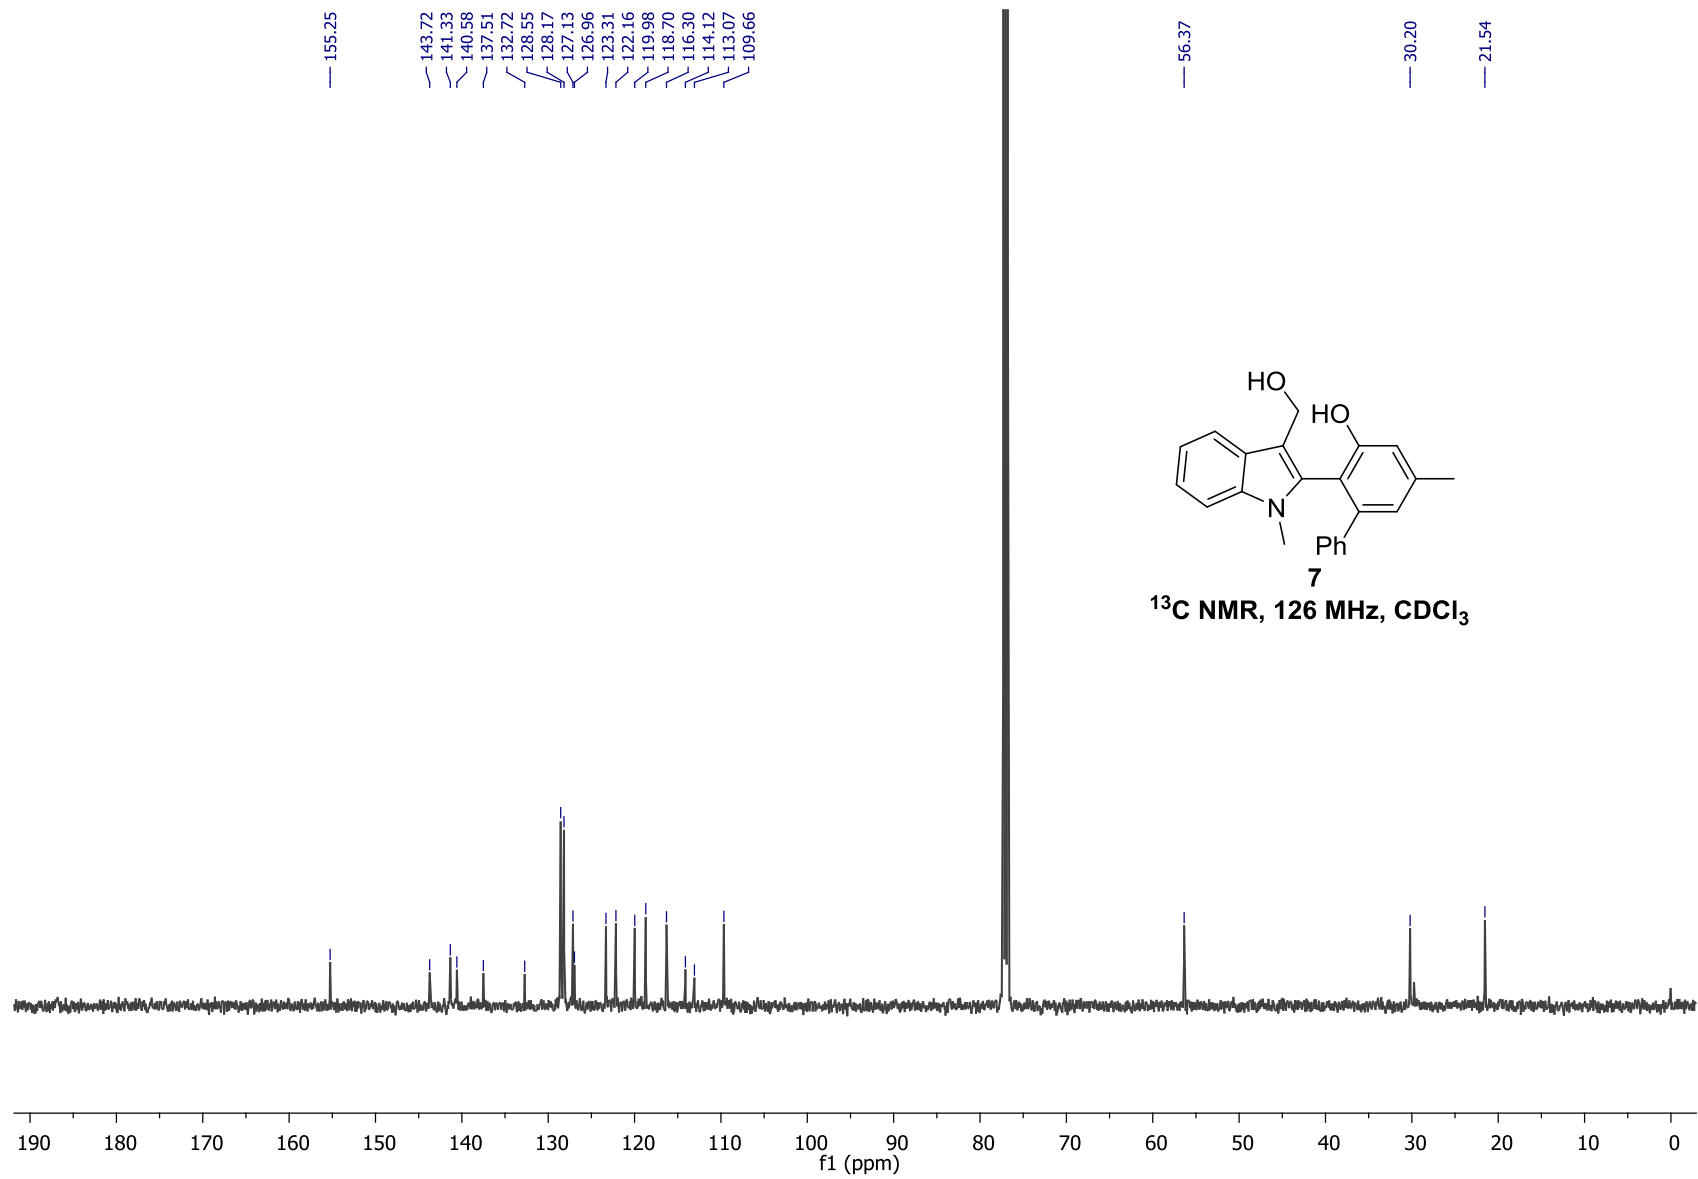

Supplement: d2ob02025d1.pdf [file d2ob02025d1.pdf]
